# Supplementary material for: Benzylidene succinimides as 3C synthons for the asymmetric tandem Mannich reaction/transamidation of cyclic trifluoromethyl ketimines to obtain F3C-containing polycyclic dihydroquinazolinones
Source: Royal Society of Chemistry journal article supplement (doi:10.1039/d0cc08131k), 2021-01-01

# Benzylidene Succinimides as 3C Synthons for the Asymmetric Tandem Mannich Reaction/Transamidation of Cyclic Trifluoromethyl Ketimines to Access CF<sub>3</sub>-Containing Polycyclic Dihydroquinazolinones

Xia-Yan Zhang,<sup>a,b,c,‡</sup> Pei-Hao Dou,<sup>a,b,c,‡</sup> Wen-Ya Lu,<sup>a,b,c</sup> Yong You,<sup>a</sup> Jian-Qiang Zhao,<sup>a</sup> Zhen-Hua Wang,<sup>\*,a</sup> Wei-Cheng Yuan<sup>\*,a</sup>

<sup>a</sup>Institute for Advanced Study, Chengdu University, Chengdu 610106, China

<sup>b</sup>National Engineering Research Center of Chiral Drugs, Chengdu Institute of Organic Chemistry, Chinese Academy of Sciences, Chengdu 610041, China

<sup>c</sup>University of Chinese Academy of Sciences, Beijing, 100049, China

E-mail: yuanwc@cioc.ac.cn

wangzhenhua@cdu.edu.cn

## Supporting Information

### Table of Contents

|                                                                                                 |     |
|-------------------------------------------------------------------------------------------------|-----|
| 1. General experimental information .....                                                       | S1  |
| 2. General experimental procedures for synthesis of compounds <b>1</b> .....                    | S1  |
| 3. General experimental procedures for synthesis of compounds <b>2</b> .....                    | S1  |
| 4. General experimental procedures for asymmetric synthesis of compounds <b>3</b> ....          | S2  |
| 5. Scale-up experiment .....                                                                    | S15 |
| 6. Experimental procedures for synthesis of compound <b>4</b> .....                             | S15 |
| 7. Experimental procedure for synthesis of compound <b>5</b> .....                              | S16 |
| 8. Experimental procedure for synthesis of compound <b>6</b> .....                              | S17 |
| 9. X-ray crystal structure of compound <b>3aa</b> .....                                         | S18 |
| 10. X-ray crystal structure of compound <b>6</b> .....                                          | S19 |
| 11. <sup>1</sup> H, <sup>13</sup> C NMR, and HPLC spectra for compounds <b>3, 4, 5, 6</b> ..... | S20 |

## 1. General experimental information

Reagents were purchased from commercial sources and were used as received unless mentioned otherwise. Reactions were monitored by TLC.  $^1\text{H}$  NMR and  $^{13}\text{C}$  NMR spectra were recorded in  $\text{CDCl}_3$  or  $\text{DMSO-}d_6$ .  $^1\text{H}$  NMR chemical shifts are reported in ppm relative to tetramethylsilane (TMS) with the solvent resonance employed as the internal standard ( $\text{CDCl}_3$  at 7.26 ppm,  $\text{DMSO-}d_6$  at 2.50 ppm). Data are reported as follows: chemical shift, multiplicity (s = singlet, br s = broad singlet, d = doublet, t = triplet, q = quartet, m = multiplet), coupling constants (Hz) and integration.  $^{13}\text{C}$  NMR chemical shifts are reported in ppm from tetramethylsilane (TMS) with the solvent resonance as the internal standard ( $\text{CDCl}_3$  at 77.16 ppm,  $\text{DMSO-}d_6$  at 39.52 ppm). Melting points products were recorded on a Büchi Melting Point B-545. The HRMS were recorded by Bruker micro TOF-Q II mass spectrometer (Bremen, Germany)

## 2. General experimental procedures for synthesis of compounds 1.

Benzylidene succinimides **1** were prepared according to literatures protocol.<sup>1</sup>

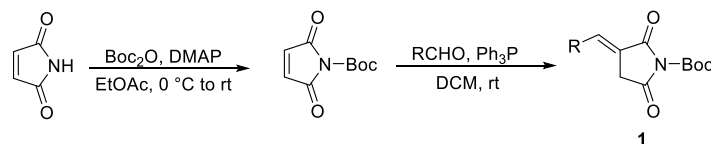

To a solution of maleimide (20 mmol) in ethyl acetate (100 mL), then 0.1 equivalent dimethylaminopyridine (DMAP, 2 mmol) was added. And the reaction mixture cooled to 0 °C, di-*tert*-butyl dicarbonate ( $\text{Boc}_2\text{O}$ , 30 mmol) was added dropwise into solution. After being stirred at room temperature for 20 h, the reaction mixture was quenched by addition of water. The aqueous layer was extracted with  $\text{CH}_2\text{Cl}_2$ . The combined organic layers were dried over anhydrous  $\text{Na}_2\text{SO}_4$ . After filtration, the solution was concentrated under reduced pressure and the resulting crude mixture was purified by silica gel column chromatography to afford compound *N*-Boc protected maleimide.

To a solution of *N*-Boc protected maleimide (6 mmol), triphenylphosphine ( $\text{Ph}_3\text{P}$ , 6.6 mmol) in dichloromethane (10 mL), and then 1.2 equivalent corresponding aldehyde was added. After stirring the mixture for 24 h, the solvent was removed under reduced pressure and the resulting crude mixture was purified by silica gel column chromatography to afford compound **1**.

## 3. General experimental procedures for synthesis of cyclic trifluoromethyl ketimines 2.

Cyclic trifluoromethyl ketimines **2** were prepared according to literatures protocol.<sup>2</sup>

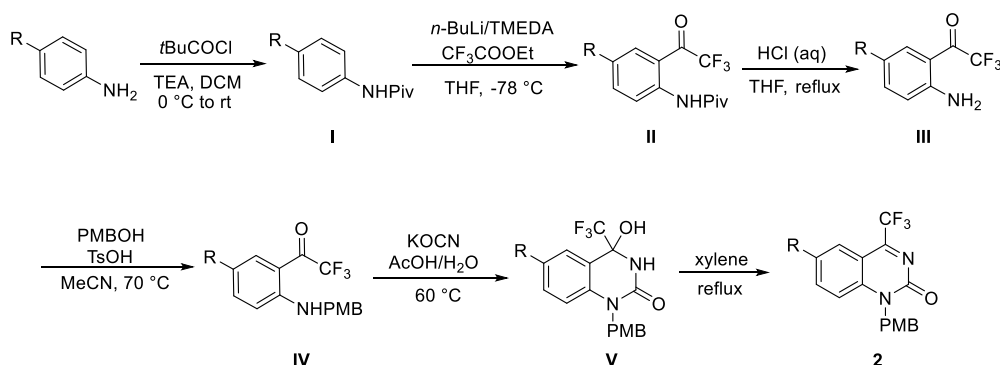

To a solution of corresponding aniline (50 mmol), triethylamine ( $\text{Et}_3\text{N}$ , 50 mmol) in dichloromethane (200 mL) under 0 °C, the pivaloyl chloride ( $\text{PivCl}$ , 50 mmol) was added

dropwise into solution. Stirring the mixture for 3-6 h, after about 150 mL solvent was removed under reduced pressure, white solid product was appeared. And then 100 mL petroleum ether was added, then filtration to afford the products **I**.

To a dried round-bottom flask was added amide **I** (20 mmol), then the device was evacuated and backfilled with argon for 3 times. Anhydrous THF (60 mL) and TMEDA (20 mmol) was added under argon protected atmosphere and the solution was cooled to -78 °C. Then the solution of *n*-BuLi (40 mmol, 1 mol/L) was added dropwise. After the solution was warmed to 0 °C for 4 h, and cooled to -78 °C, CF<sub>3</sub>COOEt (40 mmol) was added. Stirring the mixture at room temperature for another 6 h, the reaction mixture was quenched by addition of water. The aqueous layer was extracted with EtOAc. The combined organic layers were dried over anhydrous Na<sub>2</sub>SO<sub>4</sub>. After filtration, the solution was concentrated under reduced pressure and the resulting crude mixture was purified by silica gel column chromatography (MTBE/EA=50/1) to afford products **II**.

To a solution of **II** was treated with aqueous of HCl solution (6 mol/L, 40 mL), and stirred for 6 h at 80 °C. After that, the reaction mixture was neutralized (pH = 6-7) with a solution of Na<sub>2</sub>CO<sub>3</sub> and extracted with MTBE. The combined organic layers were washed with a saturated aqueous solution of NaCl and dried over anhydrous Na<sub>2</sub>SO<sub>4</sub>. Filtration, evaporation, and column chromatography on silica gel (MTBE/EA=50/1) to afford products **III**.

To a solution of compounds **III** (10 mmol), *p*-toluenesulfonic acid (1.5 mmol) with 50 mL acetonitrile, the mixture was stirred at 70 °C, and then the *p*-methoxybenzyl alcohol (11 mmol) was added dropwise. After the completion of the reaction which was monitored by TLC, the solvent was removed under reduced pressure and crude products **IV** were obtained, which were used without further purification.

To a solution of the crude compounds **IV** (8 mmol), potassium cyanate (24 mmol) with the mixture of AcOH/H<sub>2</sub>O (14/1.4 mL). The mixture was heated to 60 °C till completion. The mixture was cooled to 0 °C and 20 mL H<sub>2</sub>O was added, the products **V** isolated by filtration as a bright yellow solid, which could be washed by water twice.

A round-bottom flask equipped with a condenser with a Dean-Stark trap, was charged with products **V** and xylene (100 mL). The heterogeneous mixture was heated under reflux (137-140 °C) for 24 h. After removed 80 mL solvent, the mixture was cooled to room temperature. The resulting slurry was filtered and the product dried in vacuo at 30 °C to give **2** as a yellow powder.

#### References:

- (a) L. Yan, W. Yang, L. Li, Y. Shen and Z. Jiang, *Chin. J. Chem.*, 2011, **29**, 1906; (b) W.-L. Yang, Y.-Z. Liu, S. Luo, X. Yu, J. S. Fossey and W.-P. Deng, *Chem. Commun.*, 2015, **51**, 9212; (c) B.-L. Zhao and D.-M. Du, *Chem. Commun.*, 2016, **52**, 6162.
- (a) J. W. Corbett, S. S. Ko, J. D. Rodgers, L. A. Gearhart, N. A. Magnus, L. T. Bacheler, S. Diamond, S. Jeffrey, R. M. Klabe, P. S. Anderson, S. K. Erickson-Viitanen, *J. Med. Chem.* 2000, **43**, 2019; (b) N. A. Magnus, P. N. Confalone, L. Storace, M. Patel, C. C. Wood, W. P. Davis, Jr. R. L. Parsons, *J. Org. Chem.* 2003, **68**, 754.

#### 4. General experimental procedures for asymmetric synthesis of compounds **3**.

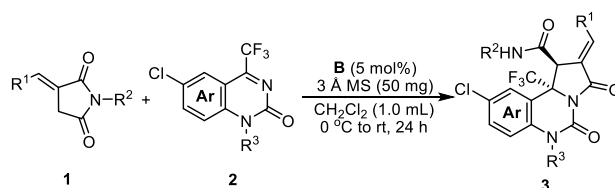

To a solution of catalyst **B** (3.2 mg, 5 mol%) and benzylidene succinimides **1** (0.1 mmol) in CH<sub>2</sub>Cl<sub>2</sub> (1.0 mL) was added cyclic trifluoromethyl ketimine **2** (0.12 mmol) and 3Å molecular sieve (50 mg). Then the mixture was stirred for 12 h at 0 °C, and then continued to run for another 12 h at room temperature. After completion, the reaction mixture was directly purified by flash chromatography on silica gel (dichloromethane/petroleum ether/ ethyl acetate = 8:1:0.5) to give the corresponding product **3**.

**Tert-butyl ((1*S*,10*bR*)-2-((*E*)-benzylidene)-9-chloro-6-(4-methoxybenzyl)-3,5-dioxo-10*b*-(trifluoromethyl)-1,2,3,5,6,10*b*-hexahydropyrrolo[1,2-*c*]quinazoline-1-carbonyl)carbamate (**3aa**).**

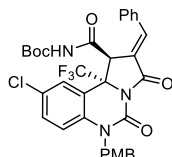

White solid; 62.0 mg, 95% yield; >20:1 *dr*, 98% *ee*;  $[\alpha]_{\text{D}}^{20} = +148.7$  (*c* 1.00, CH<sub>2</sub>Cl<sub>2</sub>); m.p. 163.5-166.2 °C.

**<sup>1</sup>H NMR (400 MHz, CDCl<sub>3</sub>)**  $\delta$  7.75 (s, 1H), 7.57 (dd, *J* = 6.7, 3.0 Hz, 2H), 7.49 (d, *J* = 14.7 Hz, 2H), 7.44-7.35 (m, 3H), 7.22-7.15 (m, 3H), 6.87 (d, *J* = 8.9 Hz, 1H), 6.83 (d, *J* = 8.7 Hz, 2H), 6.49 (s, 1H), 5.23 (d, *J* = 16.3 Hz, 1H), 5.07 (d, *J* = 16.3 Hz, 1H), 3.75 (s, 3H), 1.58 (s, 9H).

**<sup>13</sup>C NMR (101 MHz, CDCl<sub>3</sub>)**  $\delta$  166.3, 159.1, 150.9, 146.8, 137.3, 136.6, 133.3, 131.6, 131.0, 130.4, 129.7, 129.1, 128.3, 128.0, 127.3, 126.9, 126.3, 124.5 (q, *J* = 289.6 Hz, 1C), 118.0, 117.2, 114.4, 84.8, 67.3 (q, *J* = 30.0 Hz, 1C), 55.3, 46.2, 45.1, 28.1.

**HPLC analysis:** Chiralpak AD-H column (*n*-hexane/ *i*-PrOH = 75/25; flow rate: 1.0 mL/min;  $\lambda$  = 254 nm;  $t_{\text{minor}}$  = 7.00 min,  $t_{\text{major}}$  = 9.71 min).

**HRMS (ESI)** Calcd. for C<sub>33</sub>H<sub>30</sub>ClF<sub>3</sub>N<sub>3</sub>O<sub>6</sub> [M+H]<sup>+</sup>: 656.1775; found: 656.1771.

**Tert-butyl ((1*S*,10*bR*)-9-chloro-6-(4-methoxybenzyl)-2-((*E*)-2-methylbenzylidene)-3,5-dioxo-10*b*-(trifluoromethyl)-1,2,3,5,6,10*b*-hexahydropyrrolo[1,2-*c*]quinazoline-1-carbonyl)carbamate (**3ba**).**

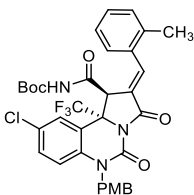

White solid; 63.7 mg, 95% yield; >20:1 *dr*, 98% *ee*;  $[\alpha]_{\text{D}}^{20} = +138.1$  (*c* 1.00, CH<sub>2</sub>Cl<sub>2</sub>); m.p. 130.6-133.2 °C.

**<sup>1</sup>H NMR (400 MHz, CDCl<sub>3</sub>)**  $\delta$  7.91 (s, 1H), 7.47-7.34 (m, 2H), 7.29 (dd, *J* = 16.2, 7.4 Hz, 2H), 7.22 (d, *J* = 6.5 Hz, 1H), 7.21-7.13 (m, 4H), 6.86 (d, *J* = 9.0 Hz, 1H), 6.83 (d, *J* = 8.6 Hz, 2H), 6.21 (s, 1H), 5.20 (d, *J* = 16.3 Hz, 1H), 5.08 (d, *J* = 16.2 Hz, 1H), 3.74 (s, 3H), 2.29 (s, 3H), 1.47 (s, 9H).

**<sup>13</sup>C NMR (101 MHz, CDCl<sub>3</sub>)**  $\delta$  165.5, 159.0, 150.3, 146.8, 142.6, 137.6, 136.9, 136.5, 132.9, 130.9, 130.6, 129.7, 129.0, 128.3, 128.0, 127.4, 127.3, 126.8, 126.2, 124.5 (q, *J* = 289.3 Hz, 1C), 118.0, 117.1, 114.4, 84.4, 67.1 (q, *J* = 29.2 Hz, 1C), 55.3, 46.2, 44.7, 27.9, 19.8.

**HPLC analysis:** Chiralpak AD-H column (*n*-hexane/ *i*-PrOH = 75/25; flow rate: 1.0 mL/min;  $\lambda$  = 254 nm;  $t_{\text{minor}}$  = 5.51 min,  $t_{\text{major}}$  = 7.02 min).

**HRMS (ESI)** Calcd. for  $\text{C}_{34}\text{H}_{32}\text{ClF}_3\text{N}_3\text{O}_6$   $[\text{M}+\text{H}]^+$ : 670.1932; found: 670.1925.

**Tert-butyl ((1*S*,10*B**R*)-9-chloro-6-(4-methoxybenzyl)-2-((*E*)-2-methoxybenzylidene)-3,5-dioxo-10*b*-(trifluoromethyl)-1,2,3,5,6,10*b*-hexahydropyrrolo[1,2-*c*]quinazoline-1-carbonyl carbamate (3ca).**

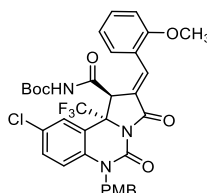

White solid; 60.2 mg, 88% yield; >20:1 *dr*, 98% *ee*;  $[\alpha]_{\text{D}}^{20}$  = +174.4 (*c* 1.00,  $\text{CH}_2\text{Cl}_2$ ); m.p. 153.8-155.2 °C.

**$^1\text{H}$  NMR (400 MHz,  $\text{CDCl}_3$ )**  $\delta$  7.96 (s, 1H), 7.46-7.40 (m, 2H), 7.39-7.31 (m, 2H), 7.17 (dd,  $J$  = 8.8, 2.5 Hz, 3H), 6.93 (dd,  $J$  = 9.9, 8.0 Hz, 2H), 6.83 (dd,  $J$  = 14.6, 8.8 Hz, 3H), 6.35 (s, 1H), 5.23 (d,  $J$  = 16.3 Hz, 1H), 5.06 (d,  $J$  = 16.3 Hz, 1H), 3.86 (s, 3H), 3.74 (s, 3H), 1.49 (s, 9H).

**$^{13}\text{C}$  NMR (101 MHz,  $\text{CDCl}_3$ )**  $\delta$  166.0, 159.0, 157.7, 150.5, 146.9, 140.7, 136.5, 133.3, 131.6, 130.8, 129.3, 128.3, 128.0, 127.4, 127.3, 126.8, 124.5 (q,  $J$  = 289.4 Hz, 1C), 122.4, 120.5, 118.2, 117.1, 114.4, 111.3, 84.3, 67.0 (q,  $J$  = 29.5 Hz, 1C), 55.5, 55.3, 46.1, 45.5, 28.0.

**HPLC analysis:** Chiralpak AD-H column (*n*-hexane/ *i*-PrOH = 75/25; flow rate: 1.0 mL/min;  $\lambda$  = 254 nm;  $t_{\text{minor}}$  = 5.66 min,  $t_{\text{major}}$  = 7.37 min).

**HRMS (ESI)** Calcd. for  $\text{C}_{34}\text{H}_{32}\text{ClF}_3\text{N}_3\text{O}_7$   $[\text{M}+\text{H}]^+$ : 686.1881; found: 686.1884.

**Tert-butyl ((1*S*,10*B**R*)-9-chloro-2-((*E*)-2-fluorobenzylidene)-6-(4-methoxybenzyl)-3,5-dioxo-10*b*-(trifluoromethyl)-1,2,3,5,6,10*b*-hexahydropyrrolo[1,2-*c*]quinazoline-1-carbonyl carbamate (3da).**

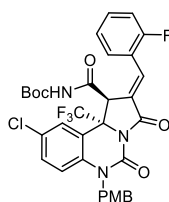

White solid; 67.9 mg, 99% yield; >20:1 *dr*, 97% *ee*;  $[\alpha]_{\text{D}}^{20}$  = +154.4 (*c* 1.00,  $\text{CH}_2\text{Cl}_2$ ); m.p. 146.5-149.8 °C.

**$^1\text{H}$  NMR (400 MHz,  $\text{CDCl}_3$ )**  $\delta$  7.83 (s, 1H), 7.59-7.42 (m, 3H), 7.42-7.34 (m, 1H), 7.22-7.07 (m, 5H), 6.87 (d,  $J$  = 8.9 Hz, 1H), 6.82 (d,  $J$  = 8.6 Hz, 2H), 6.37 (s, 1H), 5.22 (d,  $J$  = 16.2 Hz, 1H), 5.06 (d,  $J$  = 16.2 Hz, 1H), 3.74 (s, 3H), 1.52 (s, 9H).

**$^{13}\text{C}$  NMR (101 MHz,  $\text{CDCl}_3$ )**  $\delta$  165.6, 160.6 (d,  $J$  = 252.8 Hz, 1C), 159.1, 150.7 (d,  $J$  = 4.6 Hz, 1C), 146.7, 136.5, 132.1 (d,  $J$  = 8.5 Hz, 1C), 130.9, 129.8, 129.7, 129.6, 129.4, 128.4, 128.0, 127.3, 126.9, 124.5 (d,  $J$  = 3.6 Hz, 1C), 124.4 (q,  $J$  = 289.9 Hz, 1C), 121.4 (d,  $J$  = 13.4 Hz, 1C), 117.9, 117.2, 116.4 (d,  $J$  = 21.8 Hz, 1C), 114.4, 84.7, 67.23 (q,  $J$  = 29.8 Hz, 1C), 55.3, 46.2, 45.3, 28.0.

**HPLC analysis:** Chiralpak AD-H column (*n*-hexane/ *i*-PrOH = 75/25; flow rate: 1.0 mL/min;  $\lambda$  = 254 nm;  $t_{\text{minor}}$  = 5.60 min,  $t_{\text{major}}$  = 8.16 min).

**HRMS (ESI)** Calcd. for  $\text{C}_{33}\text{H}_{29}\text{ClF}_4\text{N}_3\text{O}_6$   $[\text{M}+\text{H}]^+$ : 674.1681; found: 674.1674.

***Tert*-butyl ((1*S*,10*bR*)-9-chloro-2-((*E*)-2-chlorobenzylidene)-6-(4-methoxybenzyl)-3,5-dioxo-10*b*-(trifluoromethyl)-1,2,3,5,6,10*b*-hexahydropyrrolo[1,2-*c*]quinazoline-1-carbonyl carbamate (3ea).**

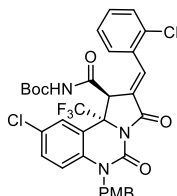

White solid; 70.1 mg, 99% yield; >20:1 *dr*, 96% *ee*;  $[\alpha]_{\text{D}}^{20}$  = +118.0 (*c* 1.00,  $\text{CH}_2\text{Cl}_2$ ); m.p. 151.4-154.3 °C.

**$^1\text{H}$  NMR (400 MHz,  $\text{CDCl}_3$ )**  $\delta$  7.94 (s, 1H), 7.49-7.35 (m, 4H), 7.35-7.27 (m, 2H), 7.20-7.13 (m, 3H), 6.86 (d,  $J$  = 9.0 Hz, 1H), 6.82 (d,  $J$  = 8.7 Hz, 2H), 6.28 (s, 1H), 5.20 (d,  $J$  = 16.3 Hz, 1H), 5.09 (d,  $J$  = 16.3 Hz, 1H), 3.74 (s, 3H), 1.47 (s, 9H).

**$^{13}\text{C}$  NMR (101 MHz,  $\text{CDCl}_3$ )**  $\delta$  169.3, 165.2, 159.1, 150.4, 146.7, 136.5, 134.7, 134.4, 132.3, 131.0, 130.9, 130.2, 130.1, 129.1, 128.4, 128.0, 127.2, 127.1, 126.8, 124.4 (q,  $J$  = 289.7 Hz, 1C), 117.9, 117.2, 114.4, 84.6, 67.2 (q,  $J$  = 29.4 Hz, 1C), 55.3, 46.2, 44.7, 28.0.

**HPLC analysis:** Chiralpak AD-H column (*n*-hexane/ *i*-PrOH = 75/25; flow rate: 1.0 mL/min;  $\lambda$  = 254 nm;  $t_{\text{minor}}$  = 5.51 min,  $t_{\text{major}}$  = 7.54 min).

**HRMS (ESI)** Calcd. for  $\text{C}_{33}\text{H}_{29}\text{Cl}_2\text{F}_3\text{N}_3\text{O}_6$   $[\text{M}+\text{H}]^+$ : 690.1386; found: 690.1404.

***Tert*-butyl ((1*S*,10*bR*)-2-((*E*)-2-bromobenzylidene)-9-chloro-6-(4-methoxybenzyl)-3,5-dioxo-10*b*-(trifluoromethyl)-1,2,3,5,6,10*b*-hexahydropyrrolo[1,2-*c*]quinazoline-1-carbonyl carbamate (3fa).**

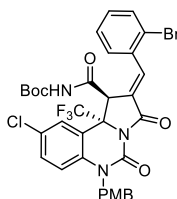

White solid; 72.1 mg, 98% yield; >20:1 *dr*, 97% *ee*;  $[\alpha]_{\text{D}}^{20}$  = +109.3 (*c* 1.00,  $\text{CH}_2\text{Cl}_2$ ); m.p. 150.2-152.7 °C.

**$^1\text{H}$  NMR (400 MHz,  $\text{CDCl}_3$ )**  $\delta$  7.88 (s, 1H), 7.63 (d,  $J$  = 7.9 Hz, 1H), 7.44-7.29 (m, 4H), 7.25-7.09 (m, 4H), 6.86 (d,  $J$  = 9.0 Hz, 1H), 6.83 (d,  $J$  = 8.6 Hz, 2H), 6.22 (s, 1H), 5.19 (d,  $J$  = 16.3 Hz, 1H), 5.10 (d,  $J$  = 16.3 Hz, 1H), 3.75 (s, 3H), 1.46 (s, 9H).

**$^{13}\text{C}$  NMR (101 MHz,  $\text{CDCl}_3$ )**  $\delta$  169.3, 165.1, 159.1, 150.4, 146.7, 136.7, 136.5, 134.4, 133.3, 131.0, 130.9, 130.2, 129.2, 128.4, 128.0, 127.7, 127.3, 126.8, 124.4 (q,  $J$  = 289.3 Hz, 1C), 124.3, 117.9, 117.3, 114.5, 84.7, 67.2 (q,  $J$  = 29.6 Hz, 1C), 55.4, 46.3, 44.6, 28.1, 28.0.

**HPLC analysis:** Chiralpak AD-H column (*n*-hexane/ *i*-PrOH = 80/20; flow rate: 1.0 mL/min;  $\lambda$  = 254 nm;  $t_{\text{minor}}$  = 7.51 min,  $t_{\text{major}}$  = 10.54 min).

**HRMS (ESI)** Calcd. for C<sub>33</sub>H<sub>29</sub>BrClF<sub>3</sub>N<sub>3</sub>O<sub>6</sub> [M+H]<sup>+</sup>: 734.0880; found: 734.0884.

***Tert*-butyl ((1*S*,10*bR*)-9-chloro-6-(4-methoxybenzyl)-2-((*E*)-3-methylbenzylidene)-3,5-dioxo-10*b*-(trifluoromethyl)-1,2,3,5,6,10*b*-hexahydropyrrolo[1,2-*c*]quinazoline-1-carbonyl) carbamate (3ga).**

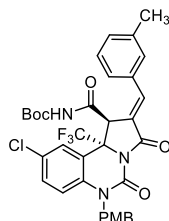

White solid; 66.8 mg, 99% yield; >20:1 *dr*, 98% *ee*;  $[\alpha]_{\text{D}}^{20}$  = +142.8 (*c* 1.00, CH<sub>2</sub>Cl<sub>2</sub>); m.p. 159.2-162.9 °C.

**<sup>1</sup>H NMR (300 MHz, DMSO-*d*<sub>6</sub>)**  $\delta$  11.39 (s, 1H), 7.77 (s, 1H), 7.63 (s, 1H), 7.59-7.46 (m, 3H), 7.46-7.32 (m, 2H), 7.20 (m, 3H), 6.91 (d, *J* = 8.3 Hz, 2H), 5.18 (dd, *J* = 34.5, 16.4 Hz, 3H), 3.71 (s, 3H), 2.41 (s, 3H), 1.41 (s, 9H).

**<sup>13</sup>C NMR (101 MHz, DMSO-*d*<sub>6</sub>)**  $\delta$  165.7, 158.6, 151.1, 148.0, 145.8, 138.6, 136.4, 136.0, 133.9, 132.5, 131.6, 131.3, 130.1, 129.1, 127.9, 127.4, 127.0, 126.6, 125.8, 124.1 (q, *J* = 240.8 Hz, 1C), 118.0, 116.8, 114.2, 81.8, 66.2 (q, *J* = 27.9 Hz, 1C), 55.1, 47.8, 44.8, 27.5, 20.9.

**HPLC analysis:** Chiralpak AD-H column (*n*-hexane/ *i*-PrOH = 75/25; flow rate: 1.0 mL/min;  $\lambda$  = 254 nm;  $t_{\text{minor}}$  = 6.37 min,  $t_{\text{major}}$  = 7.89 min).

**HRMS (ESI)** Calcd. for C<sub>34</sub>H<sub>32</sub>ClF<sub>3</sub>N<sub>3</sub>O<sub>6</sub> [M+H]<sup>+</sup>: 670.1932; found: 670.1926.

***Tert*-butyl ((1*S*,10*bR*)-9-chloro-2-((*E*)-3-chlorobenzylidene)-6-(4-methoxybenzyl)-3,5-dioxo-10*b*-(trifluoromethyl)-1,2,3,5,6,10*b*-hexahydropyrrolo[1,2-*c*]quinazoline-1-carbonyl) carbamate (3ha).**

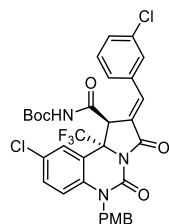

White solid; 65.8 mg, 95% yield; >20:1 *dr*, 96% *ee*;  $[\alpha]_{\text{D}}^{20}$  = +130.6 (*c* 1.00, CH<sub>2</sub>Cl<sub>2</sub>); m.p. 145.2-147.5 °C.

**<sup>1</sup>H NMR (300 MHz, CDCl<sub>3</sub>)**  $\delta$  7.61 (s, 1H), 7.42 (s, 1H), 7.41-7.35 (m, 2H), 7.33-6.99 (m, 6H), 6.81 (d, *J* = 8.9 Hz, 1H), 6.75 (d, *J* = 8.7 Hz, 2H), 6.35 (s, 1H), 5.15 (d, *J* = 16.3 Hz, 1H), 5.00 (d, *J* = 16.3 Hz, 1H), 3.68 (s, 3H), 1.49 (s, 9H).

**<sup>13</sup>C NMR (151 MHz, CDCl<sub>3</sub>)**  $\delta$  165.9, 159.2, 150.8, 146.7, 136.6, 135.8, 135.2, 135.1, 131.1, 130.4, 130.3, 129.7, 129.6, 128.4, 128.0, 127.3, 127.2, 126.8, 124.4 (q, *J* = 289.1 Hz, 1C), 117.8, 117.3, 114.5, 114.4, 85.3, 67.5 (q, *J* = 28.2 Hz, 1C), 55.4, 46.4, 44.8, 28.1.

**HPLC analysis:** Chiralpak AD-H column (*n*-hexane/ *i*-PrOH = 75/25; flow rate: 1.0 mL/min;  $\lambda$  = 254 nm;  $t_{\text{minor}}$  = 6.94 min,  $t_{\text{major}}$  = 9.56 min).

**HRMS (ESI)** Calcd. for  $\text{C}_{33}\text{H}_{29}\text{Cl}_2\text{F}_3\text{N}_3\text{O}_6$   $[\text{M}+\text{H}]^+$ : 690.1386; found: 690.1380.

***Tert*-butyl ((1*S*,10*bR*)-9-chloro-6-(4-methoxybenzyl)-2-((*E*)-4-methylbenzylidene)-3,5-dioxo-10*b*-(trifluoromethyl)-1,2,3,5,6,10*b*-hexahydropyrrolo[1,2-*c*]quinazoline-1-carbonyl) carbamate (3ia).**

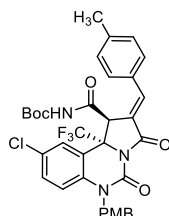

White solid; 54.2 mg, 81% yield; >20:1 *dr*, 98% *ee*;  $[\alpha]_{\text{D}}^{20}$  = +195.5 (*c* 1.00,  $\text{CH}_2\text{Cl}_2$ ); m.p. 167.6-169.2 °C.

**$^1\text{H}$  NMR (400 MHz,  $\text{CDCl}_3$ )**  $\delta$  7.72 (s, 1H), 7.58-7.37 (m, 4H), 7.24-7.08 (m, 5H), 6.86 (d,  $J$  = 8.9 Hz, 1H), 6.82 (d,  $J$  = 8.7 Hz, 2H), 6.46 (s, 1H), 5.23 (d,  $J$  = 16.3 Hz, 1H), 5.07 (d,  $J$  = 16.3 Hz, 1H), 3.75 (s, 3H), 2.38 (s, 3H), 1.60 (s, 9H).

**$^{13}\text{C}$  NMR (151 MHz,  $\text{CDCl}_3$ )**  $\delta$  166.5, 159.1, 151.0, 146.8, 141.0, 137.5, 136.6, 131.5, 130.9, 130.5, 129.9, 129.8, 128.3, 128.0, 127.4, 127.0, 125.1, 124.5 (q,  $J$  = 288.6 Hz, 1C), 118.0, 117.2, 114.4, 84.8, 67.3 (q,  $J$  = 29.0 Hz, 1C), 60.5, 55.4, 46.2, 28.1, 21.7.

**HPLC analysis:** Chiralpak AD-H column (*n*-hexane/ *i*-PrOH = 75/25; flow rate: 1.0 mL/min;  $\lambda$  = 254 nm;  $t_{\text{minor}}$  = 6.83 min,  $t_{\text{major}}$  = 9.90 min).

**HRMS (ESI)** Calcd. for  $\text{C}_{34}\text{H}_{32}\text{ClF}_3\text{N}_3\text{O}_6$   $[\text{M}+\text{H}]^+$ : 670.1932; found: 670.1927.

***Tert*-butyl ((1*S*,10*bR*)-9-chloro-6-(4-methoxybenzyl)-2-((*E*)-4-methoxybenzylidene)-3,5-dioxo-10*b*-(trifluoromethyl)-1,2,3,5,6,10*b*-hexahydropyrrolo[1,2-*c*]quinazoline-1-carbonyl) carbamate (3ja).**

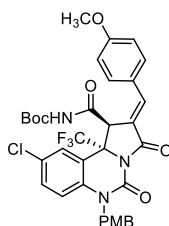

White solid; 67.4 mg, 98% yield; >20:1 *dr*, 97% *ee*;  $[\alpha]_{\text{D}}^{20}$  = +167.8 (*c* 1.00,  $\text{CH}_2\text{Cl}_2$ ); m.p. 188.8-191.0 °C.

**$^1\text{H}$  NMR (400 MHz,  $\text{CDCl}_3$ )**  $\delta$  7.68 (s, 1H), 7.63-7.39 (m, 4H), 7.19 (dd,  $J$  = 8.0, 7.7 Hz, 3H), 6.95-6.78 (m, 5H), 6.44 (s, 1H), 5.23 (d,  $J$  = 16.3 Hz, 1H), 5.07 (d,  $J$  = 16.3 Hz, 1H), 3.84 (s, 3H), 3.75 (s, 3H), 1.61 (s, 9H).

**$^{13}\text{C}$  NMR (151 MHz,  $\text{CDCl}_3$ )**  $\delta$  166.8, 161.5, 159.1, 151.1, 146.9, 137.1, 136.6, 134.1, 131.9, 130.9, 128.3, 128.0, 127.4, 126.9, 125.8, 124.5 (q,  $J$  = 289.9 Hz, 1C), 123.1, 118.1, 117.2, 114.6, 114.4, 84.8, 67.3 (q,  $J$  = 29.7 Hz, 1C), 60.5, 55.5, 55.3, 46.2, 28.1.



**HPLC analysis:** Chiralpak AD-H column (*n*-hexane/ *i*-PrOH = 75/25; flow rate: 1.0 mL/min;  $\lambda$  = 254 nm;  $t_{\text{minor}}$  = 8.45 min,  $t_{\text{major}}$  = 11.46 min).

**HRMS (ESI)** Calcd. for  $\text{C}_{34}\text{H}_{32}\text{ClF}_3\text{N}_3\text{O}_7$   $[\text{M}+\text{H}]^+$ : 686.1881; found: 686.1876.

***Tert*-butyl ((1*S*,10*bR*)-9-chloro-2-((*E*)-4-chlorobenzylidene)-6-(4-methoxybenzyl)-3,5-dioxo-10*b*-(trifluoromethyl)-1,2,3,5,6,10*b*-hexahydropyrrolo[1,2-*c*]quinazoline-1-carbonyl) carbamate (3ka).**

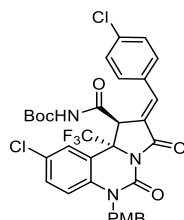

White solid; 70.1 mg, 99% yield; >20:1 *dr*, 97% *ee*;  $[\alpha]_{\text{D}}^{20}$  = +168.4 (*c* 1.00,  $\text{CH}_2\text{Cl}_2$ ); m.p. 156.7-158.9 °C.

**$^1\text{H}$  NMR (400 MHz,  $\text{CDCl}_3$ )**  $\delta$  7.69 (s, 1H), 7.59-7.40 (m, 4H), 7.39-7.33 (m, 2H), 7.22-7.13 (m, 3H), 6.87 (d,  $J$  = 8.9 Hz, 1H), 6.83 (d,  $J$  = 8.7 Hz, 2H), 6.46 (s, 1H), 5.23 (d,  $J$  = 16.3 Hz, 1H), 5.06 (d,  $J$  = 16.3 Hz, 1H), 3.75 (s, 3H), 1.58 (s, 9H).

**$^{13}\text{C}$  NMR (101 MHz,  $\text{CDCl}_3$ )**  $\delta$  169.2, 166.0, 159.1, 150.9, 146.7, 136.6, 136.4, 135.9, 131.8, 131.0, 130.8, 129.4, 128.4, 128.0, 127.3, 127.2, 126.8, 124.4 (q,  $J$  = 289.6 Hz, 1C), 117.9, 117.3, 114.5, 85.1, 67.3 (q,  $J$  = 30.0 Hz, 1C), 55.4, 46.3, 44.9, 28.0.

**HPLC analysis:** Chiralpak AD-H column (*n*-hexane/ *i*-PrOH = 70/30; flow rate: 1.0 mL/min;  $\lambda$  = 254 nm;  $t_{\text{minor}}$  = 6.05 min,  $t_{\text{major}}$  = 9.34 min).

**HRMS (ESI)** Calcd. for  $\text{C}_{33}\text{H}_{29}\text{Cl}_2\text{F}_3\text{N}_3\text{O}_6$   $[\text{M}+\text{H}]^+$ : 690.1386; found: 690.1389.

***Tert*-butyl ((1*S*,10*bR*)-2-((*E*)-4-bromobenzylidene)-9-chloro-6-(4-methoxybenzyl)-3,5-dioxo-10*b*-(trifluoromethyl)-1,2,3,5,6,10*b*-hexahydropyrrolo[1,2-*c*]quinazoline-1-carbonyl) carbamate (3la).**

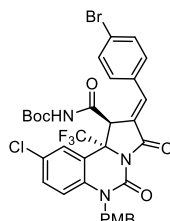

White solid; 73.1 mg, 99% yield; >20:1 *dr*, 96% *ee*;  $[\alpha]_{\text{D}}^{20}$  = +171.9 (*c* 1.00,  $\text{CH}_2\text{Cl}_2$ ); m.p. 197.7-200.3 °C.

**$^1\text{H}$  NMR (400 MHz,  $\text{CDCl}_3$ )**  $\delta$  7.67 (s, 1H), 7.52 (d,  $J$  = 8.4 Hz, 2H), 7.50-7.38 (m, 4H), 7.23-7.12 (m, 3H), 6.87 (d,  $J$  = 8.9 Hz, 1H), 6.82 (d,  $J$  = 8.6 Hz, 2H), 6.44 (s, 1H), 5.23 (d,  $J$  = 16.3 Hz, 1H), 5.06 (d,  $J$  = 16.3 Hz, 1H), 3.75 (s, 3H), 1.58 (s, 9H).

**$^{13}\text{C}$  NMR (101 MHz,  $\text{CDCl}_3$ )**  $\delta$  169.2, 166.0, 159.1, 150.9, 146.7, 136.5, 136.0, 132.4, 132.2, 131.0, 130.9, 128.4, 128.0, 127.4, 127.3, 126.8, 124.8, 124.4 (q,  $J$  = 289.6 Hz, 1C), 117.9, 117.3, 114.5, 85.1, 67.3 (q,  $J$  = 29.5 Hz, 1C), 55.4, 46.3, 44.8, 28.0.

**HPLC analysis:** Chiralpak AD-H column (*n*-hexane/ *i*-PrOH = 75/25; flow rate: 1.0 mL/min;  $\lambda$  = 254 nm;  $t_{\text{minor}}$  = 7.76 min,  $t_{\text{major}}$  = 12.68 min).

**HRMS (ESI)** Calcd. for C<sub>33</sub>H<sub>29</sub>BrClF<sub>3</sub>N<sub>3</sub>O<sub>6</sub> [M+H]<sup>+</sup>: 734.0880; found: 734.0873.

***Tert*-butyl ((1*S*,10*bR*)-9-chloro-2-((*E*)-3,4-dimethoxybenzylidene)-6-(4-methoxybenzyl)-3,5-dioxo-10*b*-(trifluoromethyl)-1,2,3,5,6,10*b*-hexahydropyrrolo[1,2-*c*]quinazoline-1-carbonyl) carbamate (3ma).**

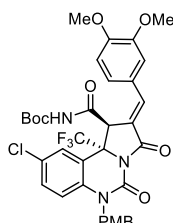

White solid; 58.1 mg, 81% yield; >20:1 *dr*, 99% *ee*;  $[\alpha]_{\text{D}}^{20}$  = +167.5 (*c* 1.00, CH<sub>2</sub>Cl<sub>2</sub>); m.p. 139.2-141.8 °C.

**<sup>1</sup>H NMR (400 MHz, CDCl<sub>3</sub>)**  $\delta$  7.68 (s, 1H), 7.50 (s, 1H), 7.32-7.26 (m, 1H), 7.24-7.06 (m, 4H), 7.00 (s, 1H), 6.88-6.84 (m, 2H), 6.84-6.79 (m, 2H), 6.46 (s, 1H), 5.22 (d, *J* = 16.4 Hz, 1H), 5.05 (d, *J* = 16.2 Hz, 1H), 3.91 (s, 3H), 3.88 (s, 3H), 3.74 (s, 3H), 1.55 (s, 9H).

**<sup>13</sup>C NMR (151 MHz, CDCl<sub>3</sub>)**  $\delta$  168.8, 166.6, 159.1, 151.1, 149.3, 146.9, 139.0, 137.6, 136.6, 136.2, 131.0, 128.8, 128.4, 128.0, 127.3, 126.9, 126.1, 124.5 (q, *J* = 289.4 Hz, 1C), 118.0, 117.2, 114.4, 114.1, 111.2, 84.7, 67.2 (q, *J* = 29.8 Hz, 1C), 56.2, 56.0, 55.3, 46.2, 31.3, 28.0.

**HPLC analysis:** Chiralpak AD-H column (*n*-hexane/ *i*-PrOH = 80/20; flow rate: 1.0 mL/min;  $\lambda$  = 254 nm;  $t_{\text{minor}}$  = 11.03 min,  $t_{\text{major}}$  = 16.32 min).

**HRMS (ESI)** Calcd. for C<sub>35</sub>H<sub>34</sub>ClF<sub>3</sub>N<sub>3</sub>O<sub>8</sub> [M+H]<sup>+</sup>: 716.1987; found: 716.2018.

***Tert*-butyl ((1*S*,10*bR*,*E*)-9-chloro-6-(4-methoxybenzyl)-3,5-dioxo-2-(thiophen-2-ylmethylene)-10*b*-(trifluoromethyl)-1,2,3,5,6,10*b*-hexahydropyrrolo[1,2-*c*]quinazoline-1-carbonyl) carbamate (3na).**

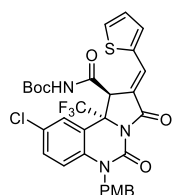

White solid; 60.3 mg, 91% yield; >20:1 *dr*, 97% *ee*;  $[\alpha]_{\text{D}}^{20}$  = +143.5 (*c* 1.00, CH<sub>2</sub>Cl<sub>2</sub>); m.p. 178.3-181.2 °C.

**<sup>1</sup>H NMR (400 MHz, CDCl<sub>3</sub>)**  $\delta$  7.80-7.76 (m, 1H), 7.73 (s, 1H), 7.54 (s, 1H), 7.49-7.39 (m, 2H), 7.36 (dd, *J* = 5.1, 2.9 Hz, 1H), 7.23-7.14 (m, 3H), 6.87 (d, *J* = 8.9 Hz, 1H), 6.84 (d, *J* = 8.7 Hz, 2H), 6.40 (s, 1H), 5.23 (d, *J* = 16.3 Hz, 1H), 5.09 (d, *J* = 16.3 Hz, 1H), 3.76 (s, 3H), 1.62 (s, 9H).

**<sup>13</sup>C NMR (151 MHz, CDCl<sub>3</sub>)**  $\delta$  166.6, 159.1, 151.4, 146.8, 136.6, 135.1, 131.0, 130.5, 130.2, 128.9, 128.3, 128.0, 127.6, 127.4, 127.1, 127.0, 124.4 (q, *J* = 290.2 Hz, 1C), 124.1, 118.0, 117.2, 114.4, 85.0, 67.3 (q, *J* = 29.0 Hz, 1C), 60.5, 55.4, 46.2, 28.0.

**HPLC analysis:** Chiralpak AD-H column (*n*-hexane/ *i*-PrOH = 75/25; flow rate: 1.0 mL/min;  $\lambda$  = 254 nm;  $t_{\text{minor}}$  = 7.64 min,  $t_{\text{major}}$  = 10.72 min).

**HRMS (ESI)** Calcd. for  $\text{C}_{31}\text{H}_{28}\text{ClF}_3\text{N}_3\text{O}_6\text{S}$   $[\text{M}+\text{H}]^+$ : 662.1339; found: 662.1346.

**Tert-butyl ((1*S*,10*bR*,*E*)-9-chloro-2-(furan-2-ylmethylene)-6-(4-methoxybenzyl)-3,5-dioxo-10*b*-(trifluoromethyl)-1,2,3,5,6,10*b*-hexahydropyrrolo[1,2-*c*]quinazoline-1-carbonyl) carbamate (30a).**

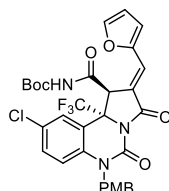

White solid; 62.2 mg, 96% yield; >20:1 *dr*, 97% *ee*;  $[\alpha]_{\text{D}}^{20}$  = +247.3 (*c* 1.00,  $\text{CH}_2\text{Cl}_2$ ); m.p. 166.4-168.2 °C.

**$^1\text{H}$  NMR (300 MHz,  $\text{DMSO-}d_6$ )**  $\delta$  11.35 (s, 1H), 7.94 (s, 1H), 7.81 (s, 1H), 7.59-7.46 (m, 2H), 7.28-7.12 (m, 4H), 6.91 (d,  $J$  = 8.0 Hz, 2H), 6.82-6.74 (m, 1H), 5.17 (q,  $J$  = 16.6 Hz, 3H), 3.71 (s, 3H), 1.42 (s, 9H).

**$^{13}\text{C}$  NMR (101 MHz,  $\text{DMSO-}d_6$ )**  $\delta$  165.5, 158.5, 154.3, 149.2, 146.8, 145.9, 136.0, 131.1, 127.8, 127.4, 127.0, 126.6, 125.8, 124.7 (q,  $J$  = 288.0 Hz, 1C), 122.9, 121.8, 119.7, 117.7, 117.0, 114.1, 113.5, 81.4, 66.2 (q,  $J$  = 31.8 Hz, 1C), 55.0, 48.1, 44.8, 27.5.

**HPLC analysis:** Chiralpak AD-H column (*n*-hexane/ *i*-PrOH = 75/25; flow rate: 1.0 mL/min;  $\lambda$  = 254 nm;  $t_{\text{minor}}$  = 7.11 min,  $t_{\text{major}}$  = 17.95 min).

**HRMS (ESI)** Calcd. for  $\text{C}_{31}\text{H}_{28}\text{ClF}_3\text{N}_3\text{O}_7$   $[\text{M}+\text{H}]^+$ : 646.1568; found: 646.1558.

**Tert-butyl ((1*S*,10*bR*,*E*)-9-chloro-6-(4-methoxybenzyl)-2-(naphthalen-2-ylmethylene)-3,5-dioxo-10*b*-(trifluoromethyl)-1,2,3,5,6,10*b*-hexahydropyrrolo[1,2-*c*]quinazoline-1-carbonyl) carbamate (3pa).**

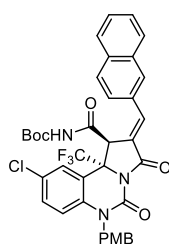

Light yellow solid; 67.2 mg, 95% yield; >20:1 *dr*, 97% *ee*;  $[\alpha]_{\text{D}}^{20}$  = +204.5 (*c* 1.00,  $\text{CH}_2\text{Cl}_2$ ); m.p. 176.8-177.2 °C.

**$^1\text{H}$  NMR (300 MHz,  $\text{DMSO-}d_6$ )**  $\delta$  11.40 (s, 1H), 8.27 (s, 1H), 8.04 (dd,  $J$  = 12.4, 7.9 Hz, 3H), 7.92-7.70 (m, 3H), 7.70-7.60 (m, 2H), 7.54 (dd,  $J$  = 8.9, 2.4 Hz, 1H), 7.21 (dd,  $J$  = 8.9 Hz, 3H), 6.91 (d,  $J$  = 8.3 Hz, 2H), 5.35 (s, 1H), 5.25 (d,  $J$  = 16.2 Hz, 1H), 5.13 (d,  $J$  = 16.2 Hz, 1H), 3.71 (s, 3H), 1.34 (s, 9H).

**$^{13}\text{C}$  NMR (151 MHz,  $\text{CDCl}_3$ )**  $\delta$  171.4, 166.4, 159.1, 150.9, 146.9, 137.6, 136.6, 133.9, 133.2, 131.1, 131.0, 130.7, 129.0, 128.8, 128.3, 128.0, 127.8, 127.7, 127.3, 126.9, 126.8, 126.3, 125.3,

124.5 (q,  $J = 289.6$  Hz, 1C), 118.0, 117.2, 114.4, 84.9, 67.4 (q,  $J = 28.0$  Hz, 1C), 60.5, 55.3, 46.3, 28.0.

**HPLC analysis:** Chiralpak AD-H column (*n*-hexane/ *i*-PrOH = 75/25; flow rate: 1.0 mL/min;  $\lambda = 254$  nm;  $t_{\text{minor}} = 8.44$  min,  $t_{\text{major}} = 13.40$  min).

**HRMS (ESI)** Calcd. for  $\text{C}_{37}\text{H}_{32}\text{ClF}_3\text{N}_3\text{O}_6$   $[\text{M}+\text{H}]^+$ : 706.1932; found: 706.1940.

**Tert-butyl** ((1*S*,10*bR*,*E*)-9-chloro-6-(4-methoxybenzyl)-3,5-dioxo-2-pentylidene-10*b*-(trifluoromethyl)-1,2,3,5,6,10*b*-hexahydropyrrolo[1,2-*c*]quinazoline-1-carbonyl)carbamate (**3qa**).

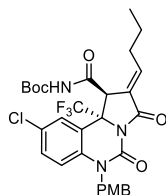

White solid; 46.1 mg, 74% yield; >20:1 *dr*, 99% *ee*;  $[\alpha]_{\text{D}}^{20} = +92.1$  ( $c$  1.00,  $\text{CH}_2\text{Cl}_2$ ); m.p. 138.7-140.4 °C.

**$^1\text{H}$  NMR (300 MHz,  $\text{DMSO-}d_6$ )**  $\delta$  11.26 (s, 1H), 7.51 (dd,  $J = 8.9, 2.3$  Hz, 1H), 7.42 (s, 1H), 7.18 (dd,  $J = 8.7, 5.8$  Hz, 3H), 6.90 (d,  $J = 8.2$  Hz, 2H), 6.81 (dd,  $J = 11.0, 7.8$  Hz, 1H), 5.21 (d,  $J = 16.4$  Hz, 1H), 5.10 (d,  $J = 16.4$  Hz, 1H), 4.90 (s, 1H), 3.71 (s, 3H), 2.36-2.13 (m, 2H), 1.55-1.46 (m, 2H), 1.45 (s, 9H), 0.89 (t,  $J = 7.3$  Hz, 3H).

**$^{13}\text{C}$  NMR (101 MHz,  $\text{DMSO-}d_6$ )**  $\delta$  164.2, 158.5, 148.3, 145.9, 140.7, 136.0, 131.0, 130.8, 128.1, 127.8, 127.4, 127.0, 125.7, 124.3 (q,  $J = 288.9$  Hz, 1C), 117.8, 117.4, 114.1, 81.8, 65.7 (q,  $J = 28.2$  Hz, 1C), 55.0, 46.4, 44.7, 31.0, 27.5, 21.0, 13.4.

**HPLC analysis:** Chiralpak AD-H column (*n*-hexane/ *i*-PrOH = 75/25; flow rate: 1.0 mL/min;  $\lambda = 254$  nm;  $t_{\text{minor}} = 5.83$  min,  $t_{\text{major}} = 7.00$  min);

**HRMS (ESI)** Calcd. for  $\text{C}_{30}\text{H}_{32}\text{ClF}_3\text{N}_3\text{O}_6$   $[\text{M}+\text{H}]^+$ : 622.1932; found: 622.1927.

**Ethyl** ((1*S*,10*bR*)-2-((*E*)-benzylidene)-9-chloro-6-(4-methoxybenzyl)-3,5-dioxo-10*b*-(trifluoromethyl)-1,2,3,5,6,10*b*-hexahydropyrrolo[1,2-*c*]quinazoline-1-carbonyl)carbamate (**3ra**).

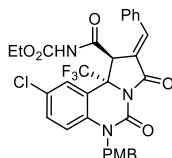

White solid; 62.2 mg, 99% yield; >20:1 *dr*, 97% *ee*;  $[\alpha]_{\text{D}}^{20} = +146.2$  ( $c$  1.00,  $\text{CH}_2\text{Cl}_2$ ); m.p. 146.8-148.7 °C.

**$^1\text{H}$  NMR (300 MHz,  $\text{DMSO-}d_6$ )**  $\delta$  11.63 (s, 1H), 7.79-7.63 (m, 4H), 7.60-7.41 (m, 4H), 7.20 (dd,  $J = 8.7, 8.2$  Hz, 3H), 6.91 (d,  $J = 8.2$  Hz, 2H), 5.34 (s, 1H), 5.24 (d,  $J = 16.5$  Hz, 1H), 5.12 (d,  $J = 16.5$  Hz, 1H), 4.25-3.96 (m, 2H), 3.71 (s, 3H), 1.20 (t,  $J = 7.2$  Hz, 3H).

**$^{13}\text{C}$  NMR (101 MHz,  $\text{DMSO-}d_6$ )**  $\delta$  165.6, 158.6, 145.9, 136.3, 136.0, 132.5, 131.4, 131.0, 130.1, 130.0, 129.3, 128.3, 128.0, 127.4, 127.2, 126.5, 125.5, 124.3 (q,  $J = 289.8$  Hz, 1C), 118.0, 116.7, 114.2, 66.3 (q,  $J = 29.7$ , 1C), 61.9, 55.1, 47.6, 44.9, 14.0.

**HPLC analysis:** Chiralpak AS-H column (*n*-hexane/ *i*-PrOH = 70/30; flow rate: 1.0 mL/min;  $\lambda$  = 254 nm;  $t_{\text{major}}$  = 6.87 min,  $t_{\text{minor}}$  = 16.28 min).

**HRMS (ESI)** Calcd. for C<sub>31</sub>H<sub>26</sub>ClF<sub>3</sub>N<sub>3</sub>O<sub>6</sub> [M+H]<sup>+</sup>: 628.1462; found: 628.1451.

**(1*S*,10*bR*)-*N*-acetyl-2-((*E*)-benzylidene)-9-chloro-6-(4-methoxybenzyl)-3,5-dioxo-10b-(trifluoromethyl)-1,2,3,5,6,10b-hexahydropyrrolo[1,2-*c*]quinazoline-1-carboxamide (3sa).**

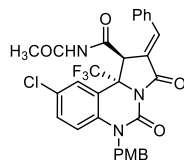

White solid; 59.6 mg, 99% yield; >20:1 *dr*, 95% *ee*;  $[\alpha]_{\text{D}}^{20}$  = +164.5 (*c* 1.00, CH<sub>2</sub>Cl<sub>2</sub>); m.p. 151.6-154.2 °C.

**<sup>1</sup>H NMR (300 MHz, DMSO-*d*<sub>6</sub>)**  $\delta$  11.62 (s, 1H), 7.77-7.65 (m, 4H), 7.59-7.49 (m, 4H), 7.23 (d, *J* = 9.0 Hz, 1H), 7.19 (d, *J* = 8.4 Hz, 2H), 6.90 (d, *J* = 8.7 Hz, 2H), 5.52 (s, 1H), 5.27 (d, *J* = 16.4 Hz, 1H), 5.11 (d, *J* = 16.4 Hz, 1H), 3.71 (s, 3H), 1.99 (s, 3H).

**<sup>13</sup>C NMR (151 MHz, DMSO-*d*<sub>6</sub>)**  $\delta$  165.6, 158.6, 145.8, 136.5, 136.0, 132.5, 131.3, 131.0, 130.9, 130.0, 129.3, 128.3, 128.0, 127.4, 127.1, 126.6, 125.5, 124.3 (q, *J* = 289.9 Hz, 1C), 118.0, 116.8, 114.2, 66.3 (q, *J* = 29.4 Hz, 1C), 55.1, 47.3, 44.8, 24.8.

**HPLC analysis:** Chiralpak AD-H column (*n*-hexane/ *i*-PrOH = 75/25; flow rate: 1.0 mL/min;  $\lambda$  = 254 nm;  $t_{\text{minor}}$  = 9.08 min,  $t_{\text{major}}$  = 12.04 min).

**HRMS (ESI)** Calcd. for C<sub>30</sub>H<sub>24</sub>ClF<sub>3</sub>N<sub>3</sub>O<sub>5</sub> [M+H]<sup>+</sup>: 598.1357; found: 598.1351.

***Tert*-butyl ((1*S*,10*bR*)-2-((*E*)-benzylidene)-6-(4-methoxybenzyl)-9-methyl-3,5-dioxo-10b-(trifluoromethyl)-1,2,3,5,6,10b-hexahydropyrrolo[1,2-*c*]quinazoline-1-carbonyl)carbamate (3ab).**

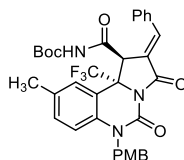

Light yellow solid; 56.6 mg, 89% yield; >20:1 *dr*, 93% *ee*;  $[\alpha]_{\text{D}}^{20}$  = +163.6 (*c* 1.00, CH<sub>2</sub>Cl<sub>2</sub>); m.p. 134.5-137.9 °C.

**<sup>1</sup>H NMR (300 MHz, CDCl<sub>3</sub>)**  $\delta$  7.75 (s, 1H), 7.59 (dd, *J* = 6.7, 3.0 Hz, 2H), 7.44-7.37 (m, 3H), 7.34 (s, 1H), 7.28 (s, 1H), 7.20 (d, *J* = 8.6 Hz, 2H), 7.04 (dd, *J* = 8.4, 1.5 Hz, 1H), 6.83 (d, *J* = 8.3 Hz, 3H), 6.43 (s, 1H), 5.23 (d, *J* = 16.2 Hz, 1H), 5.09 (d, *J* = 16.2 Hz, 1H), 3.75 (s, 3H), 2.22 (s, 3H), 1.56 (s, 9H).

**<sup>13</sup>C NMR (151 MHz, CDCl<sub>3</sub>)**  $\delta$  166.5, 158.9, 150.7, 147.2, 139.8, 137.0, 135.5, 133.4, 132.5, 131.6, 130.3, 129.7, 129.1, 128.1, 128.0, 127.2, 126.8, 124.7 (q, *J* = 290.2 Hz, 1C), 116.3, 115.8, 114.3, 84.4, 67.6 (q, *J* = 28.1 Hz, 1C), 55.4, 46.1, 32.1, 28.1, 20.7.

**HPLC analysis:** Chiralpak AD-H column (*n*-hexane/ *i*-PrOH = 75/25; flow rate: 1.0 mL/min;  $\lambda$  = 254 nm;  $t_{\text{minor}}$  = 6.74 min,  $t_{\text{major}}$  = 8.88 min).

**HRMS (ESI)** Calcd. for C<sub>34</sub>H<sub>33</sub>F<sub>3</sub>N<sub>3</sub>O<sub>6</sub> [M+H]<sup>+</sup>: 636.2321; found: 636.2304.

**Tert-butyl ((1S,10bR)-2-((E)-benzylidene)-6,9-bis(4-methoxybenzyl)-3,5-dioxo-10b-(trifluoromethyl)-1,2,3,5,6,10b-hexahydropyrrolo[1,2-c]quinazoline-1-carbonyl)carbamate (3ac).**

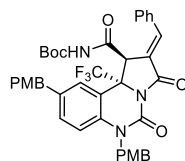

White solid; 60.1 mg, 81% yield; >20:1 *dr*, 97% *ee*;  $[\alpha]_D^{20} = +144.8$  (*c* 1.00, CH<sub>2</sub>Cl<sub>2</sub>); m.p. 133.4-136.2 °C.

**<sup>1</sup>H NMR (300 MHz, CDCl<sub>3</sub>)**  $\delta$  7.77 (s, 1H), 7.63-7.54 (m, 2H), 7.40 (dd, *J* = 5.0, 1.8 Hz, 3H), 7.36 (s, 1H), 7.25-7.16 (m, 3H), 7.00 (dd, *J* = 8.6, 1.8 Hz, 1H), 6.96-6.85 (m, 3H), 6.85-6.75 (m, 4H), 6.43 (s, 1H), 5.15 (s, 2H), 3.80 (d, *J* = 3.7 Hz, 2H), 3.75 (s, 3H), 3.75 (s, 3H), 1.44 (s, 9H).

**<sup>13</sup>C NMR (151 MHz, CDCl<sub>3</sub>)**  $\delta$  166.5, 159.0, 158.3, 150.6, 147.2, 137.2, 136.2, 135.9, 133.5, 132.4, 131.6, 130.3, 129.7, 129.4, 129.1, 128.1, 128.0, 127.4, 126.8, 124.8 (q, *J* = 289.6 Hz, 1C), 116.4, 116.2, 114.4, 114.3, 114.1, 84.4, 67.6 (q, *J* = 31.0 Hz, 1C), 55.4, 46.3, 45.3, 40.1, 29.8, 27.9.

**HPLC analysis:** Chiralpak AD-H column (*n*-hexane/ *i*-PrOH = 70/30; flow rate: 1.0 mL/min;  $\lambda$  = 254 nm; *t*<sub>major</sub> = 6.58 min, *t*<sub>minor</sub> = 15.33 min).

**HRMS (ESI)** Calcd. for C<sub>41</sub>H<sub>39</sub>F<sub>3</sub>N<sub>3</sub>O<sub>7</sub> [M+H]<sup>+</sup>: 742.2740; found: 742.2730.

**Tert-butyl ((1S,10bR)-2-((E)-benzylidene)-9-fluoro-6-(4-methoxybenzyl)-3,5-dioxo-10b-(trifluoromethyl)-1,2,3,5,6,10b-hexahydropyrrolo[1,2-c]quinazoline-1-carbonyl)carbamate (3ad).**

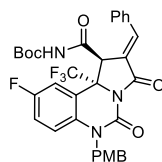

White solid; 62.5 mg, 98% yield; >20:1 *dr*, 96% *ee*;  $[\alpha]_D^{20} = +167.6$  (*c* 1.00, CH<sub>2</sub>Cl<sub>2</sub>); m.p. 147.5-151.2 °C.

**<sup>1</sup>H NMR (300 MHz, CDCl<sub>3</sub>)**  $\delta$  7.75 (s, 1H), 7.63-7.53 (m, 2H), 7.46-7.35 (m, 4H), 7.29-7.23 (m, 1H), 7.19 (d, *J* = 8.7 Hz, 2H), 7.03-6.84 (m, 2H), 6.84 (d, *J* = 8.7 Hz, 2H), 6.44 (s, 1H), 5.21 (d, *J* = 16.4 Hz, 1H), 5.11 (d, *J* = 16.4 Hz, 1H), 3.76 (s, 3H), 1.57 (s, 9H).

**<sup>13</sup>C NMR (151 MHz, CDCl<sub>3</sub>)**  $\delta$  166.3, 159.1, 158.8, 157.2, 151.0, 146.9, 137.3, 134.4 (d, *J* = 2.4 Hz, 1C), 133.3, 131.7, 130.5, 129.1, 128.9 (d, *J* = 251.1 Hz, 1C), 127.5, 126.3, 124.5 (q, *J* = 289.8 Hz, 1C), 117.9 (d, *J* = 22.2 Hz, 1C), 117.8 (d, *J* = 6.9 Hz, 1C), 117.5 (d, *J* = 7.7 Hz, 1C), 114.5, 114.0 (d, *J* = 25.5 Hz, 1C), 84.9, 67.5 (q, *J* = 29.1 Hz, 1C), 55.4, 46.5, 45.2, 28.0.

**HPLC analysis:** Chiralpak AD-H column (*n*-hexane/ *i*-PrOH = 75/25; flow rate: 1.0 mL/min;  $\lambda$  = 254 nm; *t*<sub>minor</sub> = 6.62 min, *t*<sub>major</sub> = 10.95 min).

**HRMS (ESI)** Calcd. for C<sub>33</sub>H<sub>30</sub>F<sub>4</sub>N<sub>3</sub>O<sub>6</sub> [M+H]<sup>+</sup>: 640.2071; found: 640.2066.

**Tert-butyl ((1S,10bR)-2-((E)-benzylidene)-6-(4-methoxybenzyl)-3,5-dioxo-9,10b-bis(trifluoromethyl)-1,2,3,5,6,10b-hexahydropyrrolo[1,2-c]quinazoline-1-carbonyl)carbamate (3ae).**

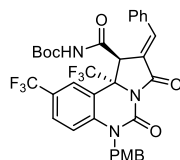

White solid; 67.1 mg, 97% yield; >20:1 *dr*, 98% *ee*;  $[\alpha]_D^{20} = +186.5$  (*c* 1.00, CH<sub>2</sub>Cl<sub>2</sub>); m.p. 136.7-139.4 °C.

<sup>1</sup>H NMR (300 MHz, DMSO-*d*<sub>6</sub>)  $\delta$  11.39 (s, 1H), 8.04 (s, 1H), 7.84 (d, *J* = 8.7 Hz, 1H), 7.80-7.63 (m, 3H), 7.62-7.48 (m, 3H), 7.39 (d, *J* = 8.9 Hz, 1H), 7.20 (d, *J* = 8.3 Hz, 2H), 6.92 (d, *J* = 8.3 Hz, 2H), 5.37 (s, 1H), 5.30 (d, *J* = 16.3 Hz, 1H), 5.19 (d, *J* = 16.3 Hz, 1H), 3.71 (s, 3H), 1.35 (s, 9H).

<sup>13</sup>C NMR (151 MHz, CDCl<sub>3</sub>)  $\delta$  166.2, 159.2, 150.9, 146.8, 140.8, 137.7, 133.2, 130.5, 129.6, 129.2, 128.1, 128.0, 127.0, 126.1, 125.0 (q, *J* = 33.5 Hz, 1C), 124.5, 124.4 (q, *J* = 289.4 Hz, 1C), 123.6 (q, *J* = 275.8 Hz, 1C), 122.7, 117.1, 116.0, 114.5, 85.1, 67.4 (q, *J* = 30.3 Hz, 1C), 60.5, 55.4, 46.3, 27.9.

**HPLC analysis:** Chiralpak AD-H column (*n*-hexane/ *i*-PrOH = 80/20; flow rate: 1.0 mL/min;  $\lambda$  = 254 nm; *t*<sub>minor</sub> = 7.71 min, *t*<sub>major</sub> = 9.26 min).

**HRMS (ESI)** Calcd. for C<sub>34</sub>H<sub>30</sub>F<sub>6</sub>N<sub>3</sub>O<sub>6</sub> [M+H]<sup>+</sup>: 690.2039; found: 690.2043.

**Tert-butyl ((1*S*,10*bR*)-6-benzyl-2-((*E*)-benzylidene)-9-chloro-3,5-dioxo-10*b*-(trifluoromethyl)-1,2,3,5,6,10*b*-hexahydropyrrolo[1,2-*c*]quinazoline-1-carbonyl)carbamate (3af).**

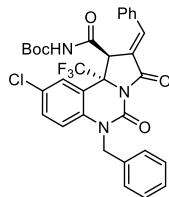

White solid; 61.1 mg, 98% yield; >20:1 *dr*, 97% *ee*;  $[\alpha]_D^{20} = +163.4$  (*c* 1.00, CH<sub>2</sub>Cl<sub>2</sub>); m.p. 152.3-154.6 °C.

<sup>1</sup>H NMR (300 MHz, CDCl<sub>3</sub>)  $\delta$  7.76 (s, 1H), 7.58 (dd, *J* = 6.7, 3.0 Hz, 2H), 7.52 (s, 1H), 7.45-7.37 (m, 4H), 7.35-7.27 (m, 2H), 7.27-7.15 (m, 4H), 6.83 (d, *J* = 8.9 Hz, 1H), 6.49 (s, 1H), 5.27 (d, *J* = 16.6 Hz, 1H), 5.17 (d, *J* = 16.6 Hz, 1H), 1.59 (s, 9H).

<sup>13</sup>C NMR (151 MHz, CDCl<sub>3</sub>)  $\delta$  166.3, 161.0, 151.0, 146.8, 137.4, 136.6, 135.4, 133.3, 131.0, 130.5, 129.7, 129.1, 129.0, 128.4, 127.7, 127.0, 126.6, 126.2, 124.5 (q, *J* = 289.6 Hz, 1C), 117.9, 117.2, 84.8, 67.4 (q, *J* = 29.9 Hz, 1C), 46.8, 45.0, 28.1.

**HPLC analysis:** Chiralpak AD-H column (*n*-hexane/ *i*-PrOH = 70/30; flow rate: 1.0 mL/min;  $\lambda$  = 254 nm; *t*<sub>minor</sub> = 5.16 min, *t*<sub>major</sub> = 8.72 min).

**HRMS (ESI)** Calcd. for C<sub>32</sub>H<sub>28</sub>ClF<sub>3</sub>N<sub>3</sub>O<sub>5</sub> [M+H]<sup>+</sup>: 626.1670; found: 626.1663.

**Tert-butyl ((1*S*,10*bR*)-2-((*E*)-benzylidene)-6-(2-bromobenzyl)-9-chloro-3,5-dioxo-10*b*-(trifluoromethyl)-1,2,3,5,6,10*b*-hexahydropyrrolo[1,2-*c*]quinazoline-1-carbonyl)carbamate (3ag).**

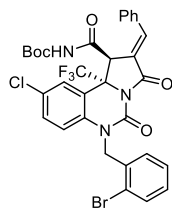

White solid; 70.1 mg, 99% yield; >20:1 *dr*, 98% *ee*;  $[\alpha]_D^{20} = +153.3$  (*c* 1.00, CH<sub>2</sub>Cl<sub>2</sub>); m.p. 154.8-156.5 °C.

<sup>1</sup>H NMR (300 MHz, CDCl<sub>3</sub>)  $\delta$  7.77 (s, 1H), 7.65-7.52 (m, 4H), 7.52-7.28 (m, 4H), 7.20 (t, *J* = 7.2 Hz, 2H), 7.12 (t, *J* = 7.0 Hz, 1H), 7.02 (d, *J* = 7.5 Hz, 1H), 6.62 (d, *J* = 8.9 Hz, 1H), 6.51 (s, 1H), 5.34 (d, *J* = 17.4 Hz, 1H), 5.16 (d, *J* = 17.4 Hz, 1H), 1.59 (s, 9H).

<sup>13</sup>C NMR (151 MHz, CDCl<sub>3</sub>)  $\delta$  166.3, 150.9, 146.7, 137.6, 136.4, 133.9, 133.2, 133.1, 131.6, 131.3, 130.6, 129.7, 129.2, 129.1, 128.7, 128.2, 127.4, 127.2, 126.1, 124.4 (q, *J* = 289.2 Hz, 1C), 122.4, 117.8, 117.0, 85.0, 67.4 (q, *J* = 29.6 Hz, 1C), 47.3, 45.1, 28.1.

**HPLC analysis:** Chiralpak AD-H column (*n*-hexane/ *i*-PrOH = 75/25; flow rate: 1.0 mL/min;  $\lambda$  = 254 nm; *t*<sub>minor</sub> = 4.56 min, *t*<sub>major</sub> = 6.44 min).

**HRMS (ESI)** Calcd. for C<sub>32</sub>H<sub>27</sub>BrClF<sub>3</sub>N<sub>3</sub>O<sub>5</sub> [M+H]<sup>+</sup>: 704.0775; found: 704.0773.

## 5. Scale-up experiment

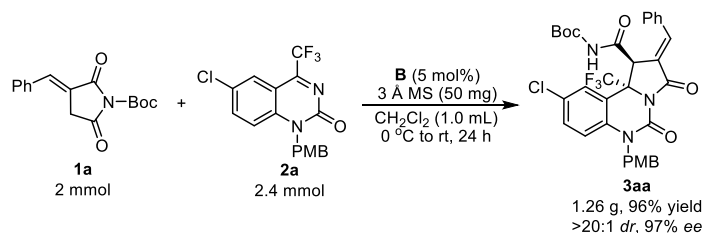

To a solution of catalyst **B** (64 mg, 5 mol %) and  $\alpha$ -arylidene succinimide **1a** (2.0 mmol) in CH<sub>2</sub>Cl<sub>2</sub> (20.0 mL) was added cyclic trifluoromethyl ketimine **2a** (2.4 mmol) and 3 Å molecular sieve (1.0 g). Then the mixture was stirred for 12 h at 0 °C, and then 12 h at 25 °C. After completion, the reaction mixture was directly purified by flash chromatography on silica gel (dichloromethane/petroleum ether/ ethyl acetate = 8:1:0.5) to give the corresponding product **3aa**.

## 6. Experimental procedures for synthesis of compound 4.

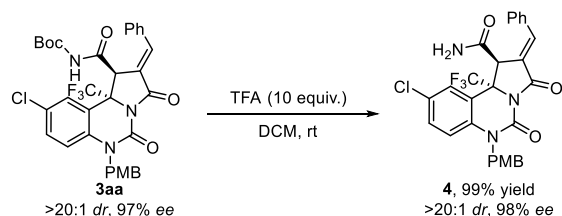

To compound **3aa** (65.5 mg, 0.1 mmol) in 1.0 mL CH<sub>2</sub>Cl<sub>2</sub> were added trifluoroacetic acid (1 mmol) at room temperature. After being stirred at room temperature for 1 h, After completion, the reaction mixture was quenched by addition of water. The aqueous layer was extracted with CH<sub>2</sub>Cl<sub>2</sub>. The combined organic layers were dried over anhydrous Na<sub>2</sub>SO<sub>4</sub>. After filtration, the solution was concentrated under reduced pressure and the resulting crude mixture was purified by silica gel column chromatography (petroleum ether/AcOEt=1:1) to afford compound **4**.



**(1S,10bR)-2-((E)-benzylidene)-9-chloro-6-(4-methoxybenzyl)-3,5-dioxo-10b-(trifluoromethyl)-1,2,3,5,6,10b-hexahydropyrrolo[1,2-c]quinazoline-1-carboxamide (4).**

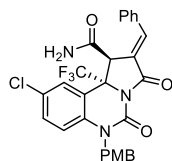

White solid; 54.8 mg, 99% yield; >20:1 *dr*, 98% *ee*;  $[\alpha]_D^{20} = +152.1$  (*c* 1.00, CH<sub>2</sub>Cl<sub>2</sub>); m.p. 231.2-233.0 °C.

<sup>1</sup>H NMR (300 MHz, DMSO-*d*<sub>6</sub>)  $\delta$  8.37 (s, 1H), 7.91-1.80 (m, 3H), 7.72 (s, 1H), 7.61-7.51 (m, 4H), 7.49 (dd, *J* = 9.0, 2.3 Hz, 1H), 7.18 (dd, *J* = 9.3, 8.7 Hz, 3H), 6.90 (d, *J* = 8.6 Hz, 2H), 5.24 (d, *J* = 16.4 Hz, 1H), 5.13 (d, *J* = 16.4 Hz, 1H), 5.12 (s, 1H), 3.71 (s, 3H).

<sup>13</sup>C NMR (151 MHz, DMSO-*d*<sub>6</sub>)  $\delta$  168.0, 166.2, 158.5, 146.1, 135.9, 134.6, 132.9, 130.9, 130.6, 130.5, 129.1, 127.9, 127.5, 127.0, 126.8, 126.7, 124.6 (q, *J* = 289.9 Hz, 1C), 117.3, 117.2, 114.1, 66.1 (q, *J* = 27.9 Hz, 1C), 55.1, 47.0, 44.7.

**HPLC analysis:** Chiralpak AD-H column (*n*-hexane/ *i*-PrOH = 80/20; flow rate: 1.0 mL/min;  $\lambda$  = 254 nm; *t*<sub>minor</sub> = 16.73 min, *t*<sub>major</sub> = 30.09 min).

**HRMS (ESI)** Calcd. for C<sub>28</sub>H<sub>21</sub>ClF<sub>3</sub>N<sub>3</sub>NaO<sub>4</sub> [M+Na]<sup>+</sup>: 578.1070; found: 578.1047.

## 7. Experimental procedure for synthesis of compound 5.

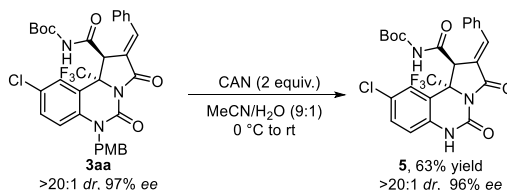

To compound **3aa** (65.5 mg, 0.1 mmol) in 0.9 mL MeCN and 0.1 mL water were stirred at 0 °C, and then 2.0 equivalent ceric ammonium nitrate was added portionwise. And the reaction mixture returns to room temperature. After being stirred at room temperature for 24 h, the reaction mixture was quenched by addition of water. The aqueous layer was extracted with CH<sub>2</sub>Cl<sub>2</sub>. The combined organic layers were dried over anhydrous Na<sub>2</sub>SO<sub>4</sub>. After filtration, the solution was concentrated under reduced pressure and the resulting crude mixture was purified by silica gel column chromatography (petroleum ether/AcOEt=1:2) to afford compound **4**.

***Tert*-butyl ((1S,10bR)-2-((E)-benzylidene)-9-chloro-3,5-dioxo-10b-(trifluoromethyl)-1,2,3,5,6,10b-hexahydropyrrolo[1,2-c]quinazoline-1-carbonyl)carbamate (5).**

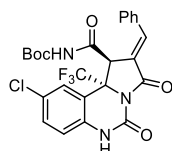

Light yellow solid; 33.9 mg, 63% yield; >20:1 *dr*, 98% *ee*;  $[\alpha]_D^{20} = +130.2$  (*c* 1.00, CH<sub>2</sub>Cl<sub>2</sub>); m.p. 149.8-151.4 °C.

<sup>1</sup>H NMR (300 MHz, DMSO-*d*<sub>6</sub>)  $\delta$  11.37 (s, 1H), 10.91 (s, 1H), 7.87-7.65 (m, 3H), 7.62 (s, 1H), 7.58-7.49 (m, 4H), 7.03 (d, *J* = 8.7 Hz, 1H), 5.25 (s, 1H), 1.38 (s, 9H).

$^{13}\text{C}$  NMR (75 MHz,  $\text{DMSO-}d_6$ )  $\delta$  165.8, 148.2, 145.1, 135.8, 135.7, 132.6, 131.4, 130.8, 130.3, 130.0, 129.2, 126.4, 126.2, 124.5 (q,  $J = 289.2$  Hz, 1C), 117.1, 114.5, 81.9, 67.4 (q,  $J = 28.5$  Hz, 1C), 54.9, 27.5.

**HPLC analysis:** Chiralpak OD-H column (*n*-hexane/ *i*-PrOH = 85/15; flow rate: 1.0 mL/min;  $\lambda = 254$  nm;  $t_{\text{minor}} = 7.55$  min,  $t_{\text{major}} = 9.51$  min).

**HRMS (ESI)** Calcd. for  $\text{C}_{25}\text{H}_{21}\text{ClF}_3\text{N}_3\text{NaO}_5$   $[\text{M}+\text{Na}]^+$ : 558.1020; found: 558.1007.

## 8. Experimental procedure for synthesis of compound 6.

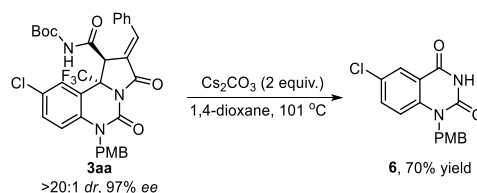

To the mixture of compound **3aa** (65.5 mg, 0.1 mmol) and 2.0 equivalent cesium carbonate was added 1,4-dioxane (1.0 mL), which was stirred in the reflux 1,4-dioxane at  $101^\circ\text{C}$  for 2 h. After the completion of the reaction which was monitored by TLC, the solvent was removed under reduced pressure and the resulting crude mixture was purified by silica gel column chromatography (petroleum ether/AcOEt=1:1) to afford compound **6**.

### 6-Chloro-1-(4-methoxybenzyl)quinazoline-2,4(1H,3H)-dione (6).

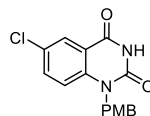

White solid; 22.3 mg, 70% yield; m.p.  $192.9$ - $194.4^\circ\text{C}$ .

$^1\text{H}$  NMR (300 MHz,  $\text{DMSO-}d_6$ )  $\delta$  11.88 (s, 1H), 7.92 (d,  $J = 2.3$  Hz, 1H), 7.69 (dd,  $J = 9.0, 2.3$  Hz, 1H), 7.30 (d,  $J = 9.0$  Hz, 1H), 7.23 (d,  $J = 8.5$  Hz, 2H), 6.88 (d,  $J = 8.5$  Hz, 2H), 5.22 (s, 2H), 3.70 (s, 3H).

$^{13}\text{C}$  NMR (101 MHz,  $\text{DMSO-}d_6$ )  $\delta$  160.8, 158.5, 150.5, 139.8, 134.8, 127.9, 127.8, 127.0, 126.5, 117.5, 114.1, 55.1, 44.8.

**HRMS (ESI)** Calcd. for  $\text{C}_{16}\text{H}_{13}\text{ClN}_2\text{NaO}_3$   $[\text{M}+\text{Na}]^+$ : 339.0512; found: 339.0509.

## 9. X-ray crystal structure of compound **3aa**

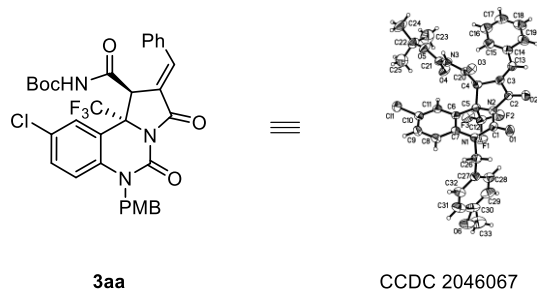

Crystal data and structure refinement for **3aa** (CCDC 2046067)

|                                             |                                                                                |
|---------------------------------------------|--------------------------------------------------------------------------------|
| Identification code                         | 20200529                                                                       |
| Empirical formula                           | C <sub>33</sub> H <sub>29</sub> ClF <sub>3</sub> N <sub>3</sub> O <sub>6</sub> |
| Formula weight                              | 656.04                                                                         |
| Temperature/K                               | 293(2)                                                                         |
| Crystal system                              | monoclinic                                                                     |
| Space group                                 | P2 <sub>1</sub>                                                                |
| a/Å                                         | 9.5411(3)                                                                      |
| b/Å                                         | 13.6581(5)                                                                     |
| c/Å                                         | 12.6050(4)                                                                     |
| α/°                                         | 90                                                                             |
| β/°                                         | 89.913(3)                                                                      |
| γ/°                                         | 90                                                                             |
| Volume/Å <sup>3</sup>                       | 1642.60(10)                                                                    |
| Z                                           | 2                                                                              |
| ρ <sub>calc</sub> /g/cm <sup>3</sup>        | 1.326                                                                          |
| μ/mm <sup>-1</sup>                          | 1.590                                                                          |
| F(000)                                      | 680.0                                                                          |
| Crystal size/mm <sup>3</sup>                | 0.18 × 0.1 × 0.08                                                              |
| Radiation                                   | CuKα (λ = 1.54184)                                                             |
| 2θ range for data collection/°              | 7.012 to 134.12                                                                |
| Index ranges                                | -11 ≤ h ≤ 10, -14 ≤ k ≤ 16, -14 ≤ l ≤ 15                                       |
| Reflections collected                       | 21371                                                                          |
| Independent reflections                     | 5348 [R <sub>int</sub> = 0.0417, R <sub>sigma</sub> = 0.0363]                  |
| Data/restraints/parameters                  | 5348/15/431                                                                    |
| Goodness-of-fit on F <sup>2</sup>           | 1.030                                                                          |
| Final R indexes [I ≥ 2σ (I)]                | R <sub>1</sub> = 0.0481, wR <sub>2</sub> = 0.1274                              |
| Final R indexes [all data]                  | R <sub>1</sub> = 0.0578, wR <sub>2</sub> = 0.1360                              |
| Largest diff. peak/hole / e Å <sup>-3</sup> | 0.16/-0.16                                                                     |
| Flack parameter                             | -0.01(2)                                                                       |

## 10. X-ray crystal structure of compound 6

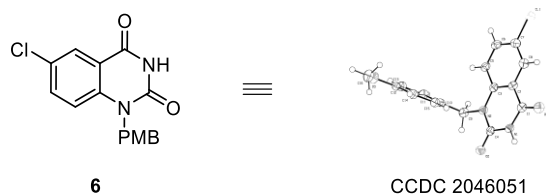

Crystal data and structure refinement for **6** (CCDC 2046051)

|                                             |                                                                 |
|---------------------------------------------|-----------------------------------------------------------------|
| Identification code                         | 2009239899_0m                                                   |
| Empirical formula                           | C <sub>16</sub> H <sub>13</sub> ClN <sub>2</sub> O <sub>3</sub> |
| Formula weight                              | 316.73                                                          |
| Temperature/K                               | 173.0                                                           |
| Crystal system                              | triclinic                                                       |
| Space group                                 | P-1                                                             |
| a/Å                                         | 7.9537(4)                                                       |
| b/Å                                         | 9.3223(4)                                                       |
| c/Å                                         | 10.8300(5)                                                      |
| α/°                                         | 84.687(3)                                                       |
| β/°                                         | 74.704(3)                                                       |
| γ/°                                         | 69.975(2)                                                       |
| Volume/Å <sup>3</sup>                       | 727.73(6)                                                       |
| Z                                           | 2                                                               |
| ρ <sub>calc</sub> /cm <sup>3</sup>          | 1.445                                                           |
| μ/mm <sup>-1</sup>                          | 1.600                                                           |
| F(000)                                      | 328.0                                                           |
| Crystal size/mm <sup>3</sup>                | 0.18 × 0.12 × 0.1                                               |
| Radiation                                   | GaKα (λ = 1.34139)                                              |
| 2θ range for data collection/°              | 8.784 to 109.936                                                |
| Index ranges                                | -9 ≤ h ≤ 9, -11 ≤ k ≤ 11, -13 ≤ l ≤ 13                          |
| Reflections collected                       | 8824                                                            |
| Independent reflections                     | 2767 [R <sub>int</sub> = 0.0538, R <sub>sigma</sub> = 0.0524]   |
| Data/restraints/parameters                  | 2767/0/200                                                      |
| Goodness-of-fit on F <sup>2</sup>           | 1.066                                                           |
| Final R indexes [I >= 2σ (I)]               | R <sub>1</sub> = 0.0476, wR <sub>2</sub> = 0.1171               |
| Final R indexes [all data]                  | R <sub>1</sub> = 0.0577, wR <sub>2</sub> = 0.1265               |
| Largest diff. peak/hole / e Å <sup>-3</sup> | 0.27/-0.40                                                      |

# 11. $^1\text{H}$ , $^{13}\text{C}$ NMR, and HPLC spectra for compounds 3, 4, 5, 6

## $^1\text{H}$ and $^{13}\text{C}$ NMR of 3aa

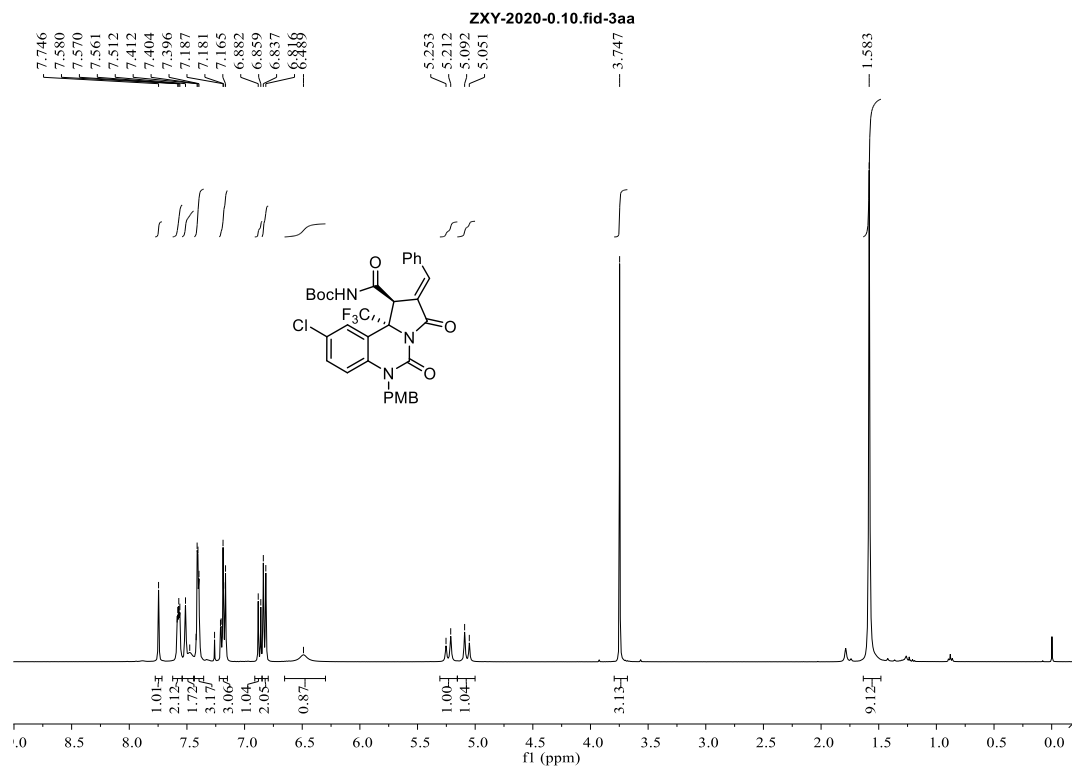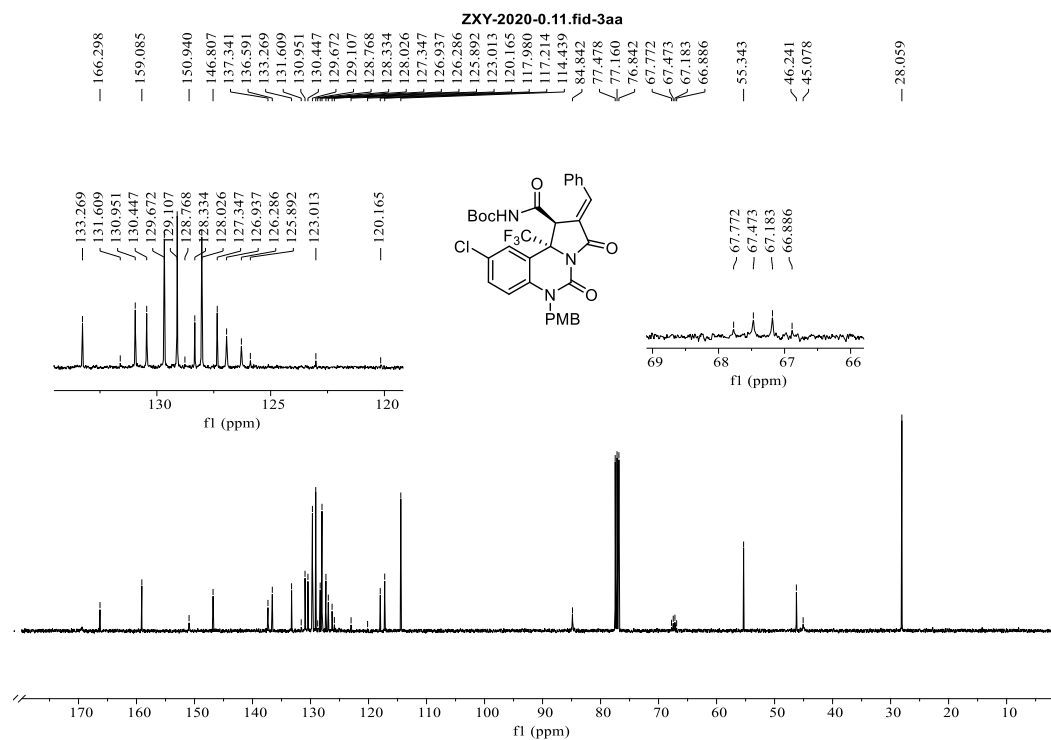

### HPLC of 3aa

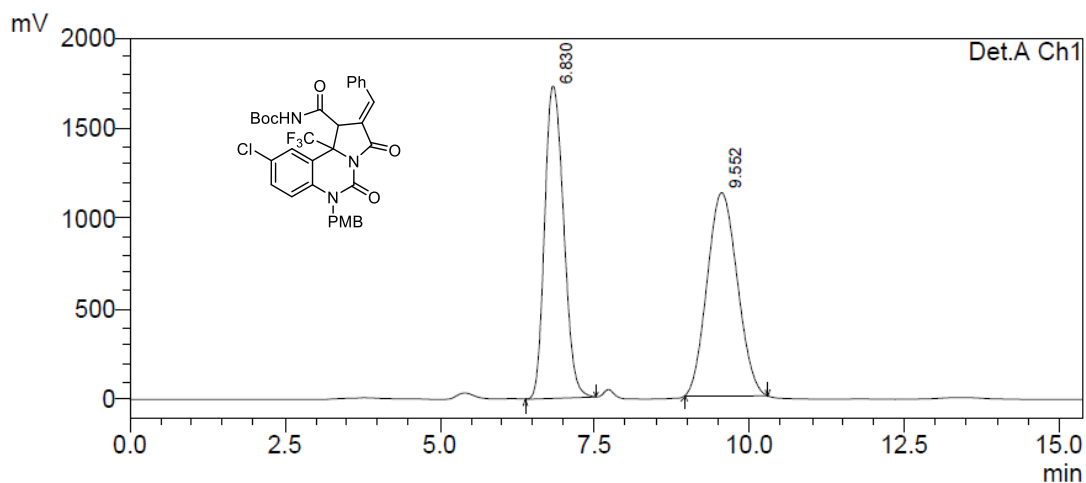

PeakTable

Detector A Ch1 254nm

| Peak# | Ret. Time | Area     | Height  | Area %  |
|-------|-----------|----------|---------|---------|
| 1     | 6.830     | 36856644 | 1726537 | 49.107  |
| 2     | 9.552     | 38196948 | 1124417 | 50.893  |
| Total |           | 75053592 |         | 100.000 |

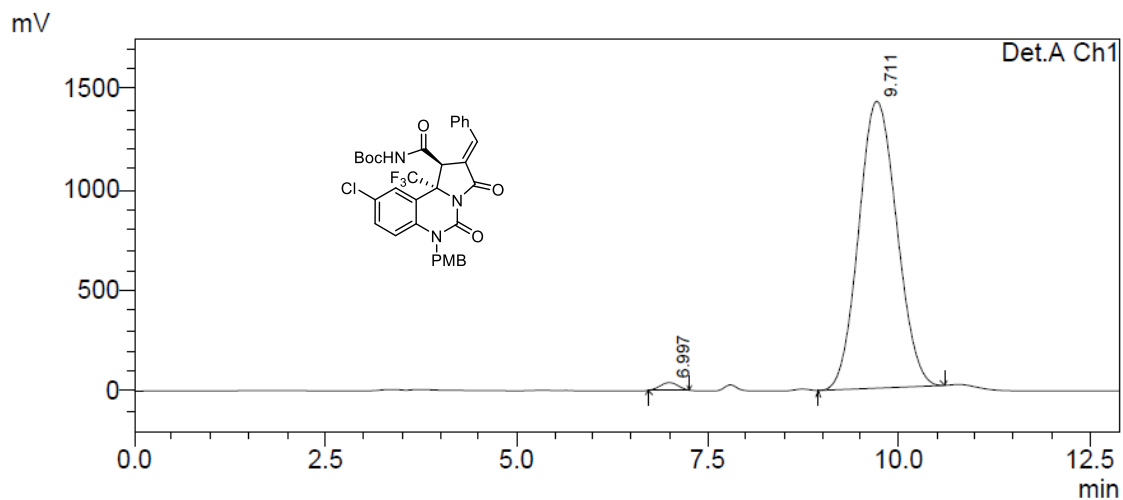

PeakTable

Detector A Ch1 254nm

| Peak# | Ret. Time | Area     | Height  | Area %  |
|-------|-----------|----------|---------|---------|
| 1     | 6.997     | 605437   | 37866   | 1.212   |
| 2     | 9.711     | 49346765 | 1422373 | 98.788  |
| Total |           | 49952202 |         | 100.000 |

# $^1\text{H}$ and $^{13}\text{C}$ NMR of **3ba**

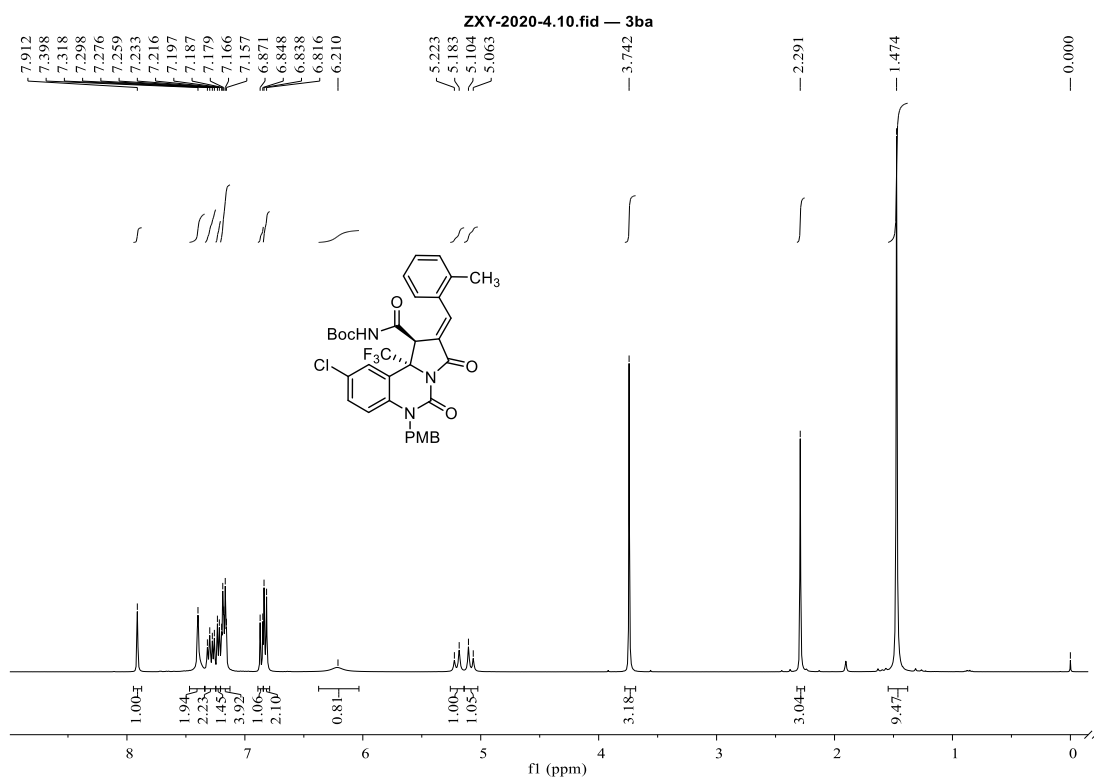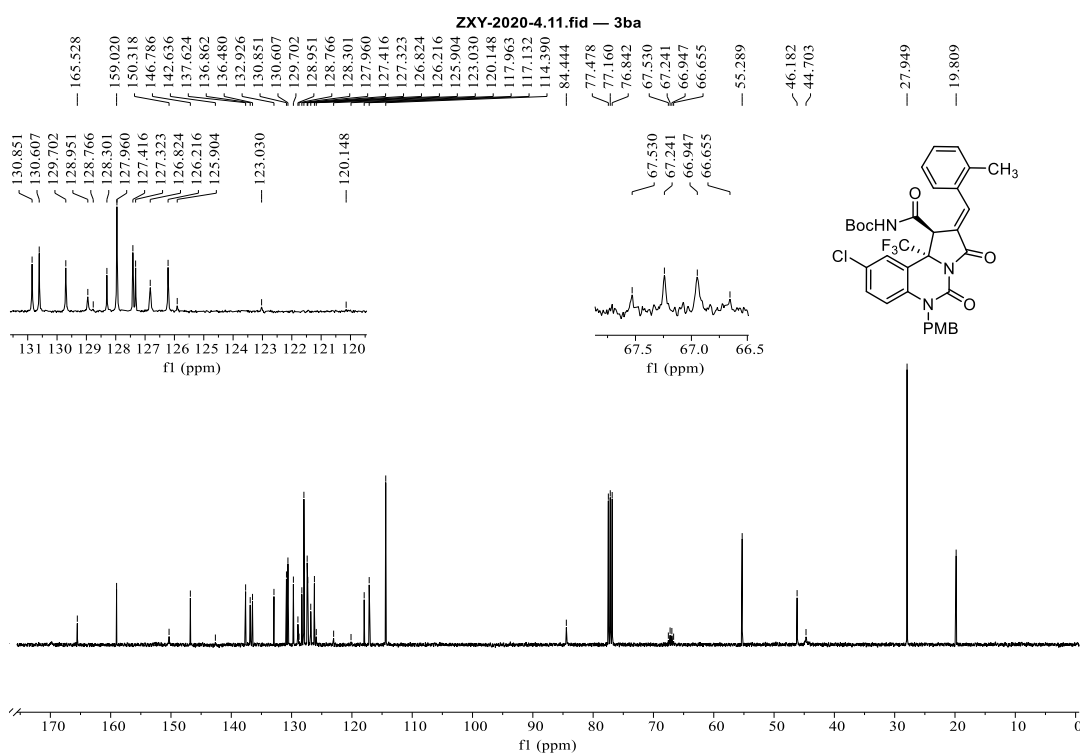

### HPLC of 3ba

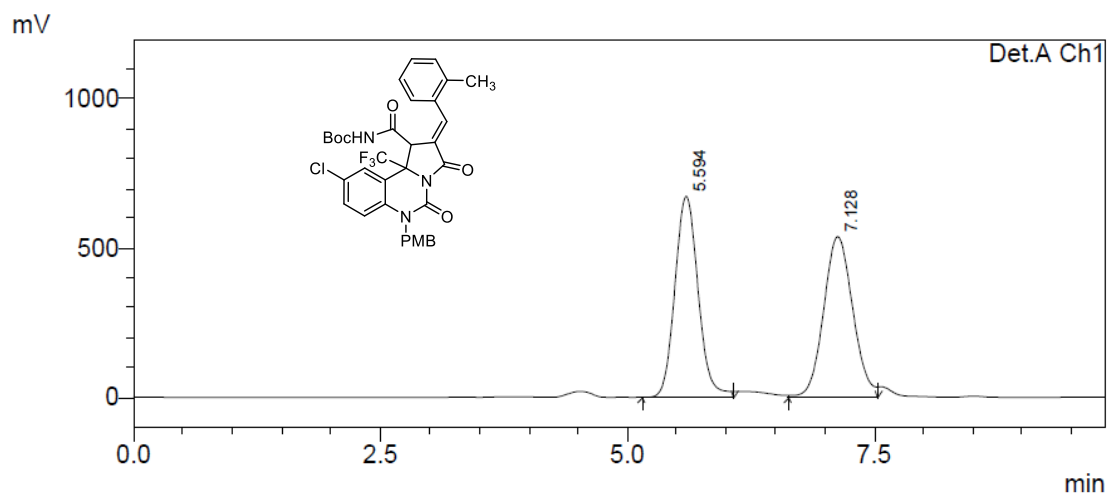

PeakTable

Detector A Ch1 254nm

| Peak# | Ret. Time | Area     | Height | Area %  |
|-------|-----------|----------|--------|---------|
| 1     | 5.594     | 11057317 | 674473 | 49.862  |
| 2     | 7.128     | 11118571 | 539292 | 50.138  |
| Total |           | 22175888 |        | 100.000 |

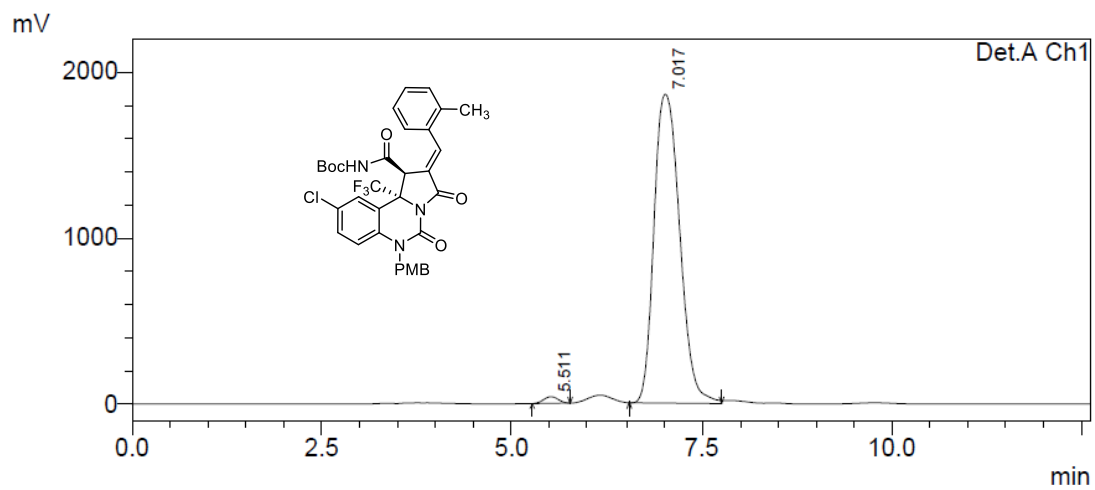

PeakTable

Detector A Ch1 254nm

| Peak# | Ret. Time | Area     | Height  | Area %  |
|-------|-----------|----------|---------|---------|
| 1     | 5.511     | 531166   | 40090   | 1.197   |
| 2     | 7.017     | 43855772 | 1858966 | 98.803  |
| Total |           | 44386938 |         | 100.000 |



# $^1\text{H}$ and $^{13}\text{C}$ NMR of **3ca**

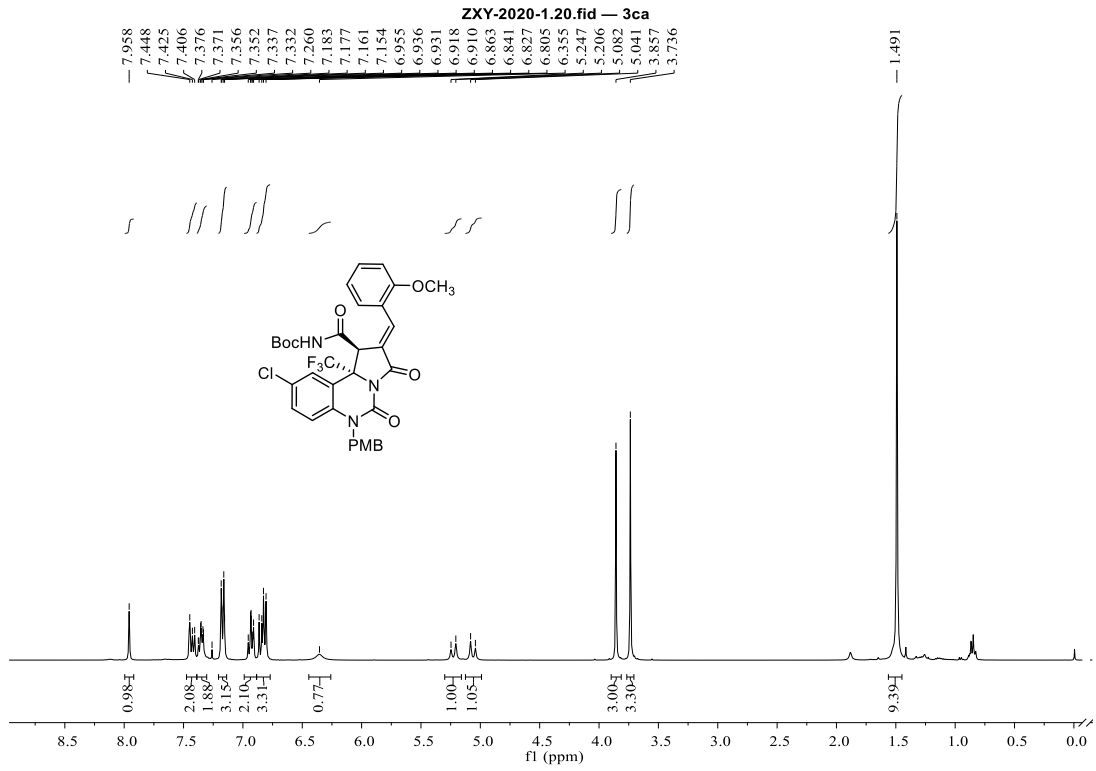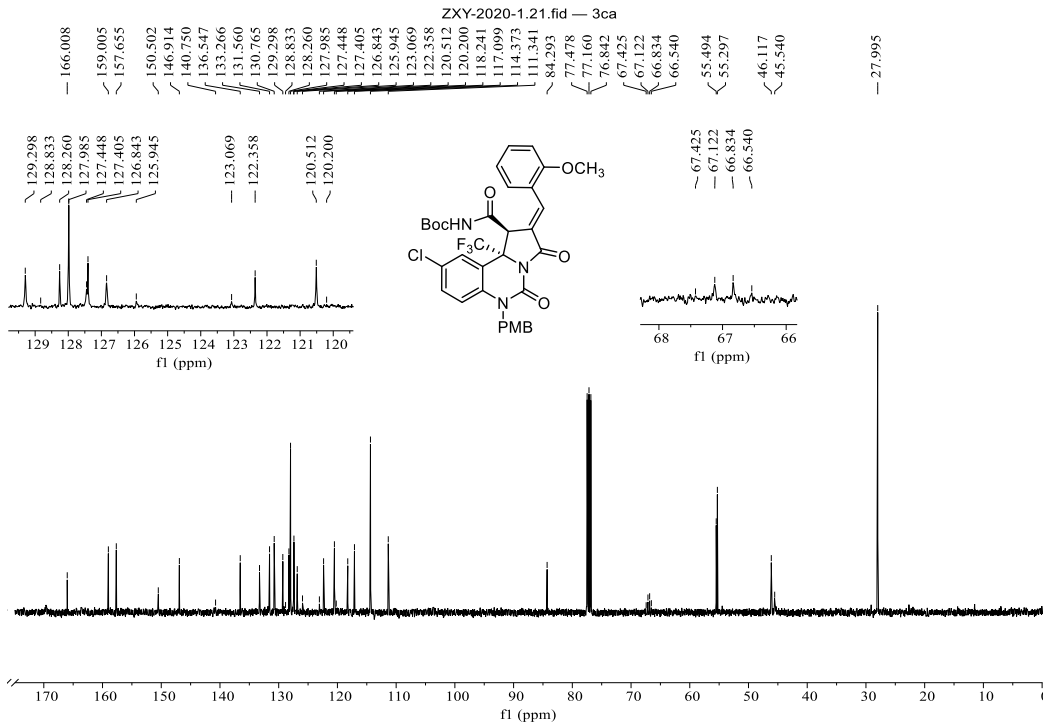

### HPLC of 3ca

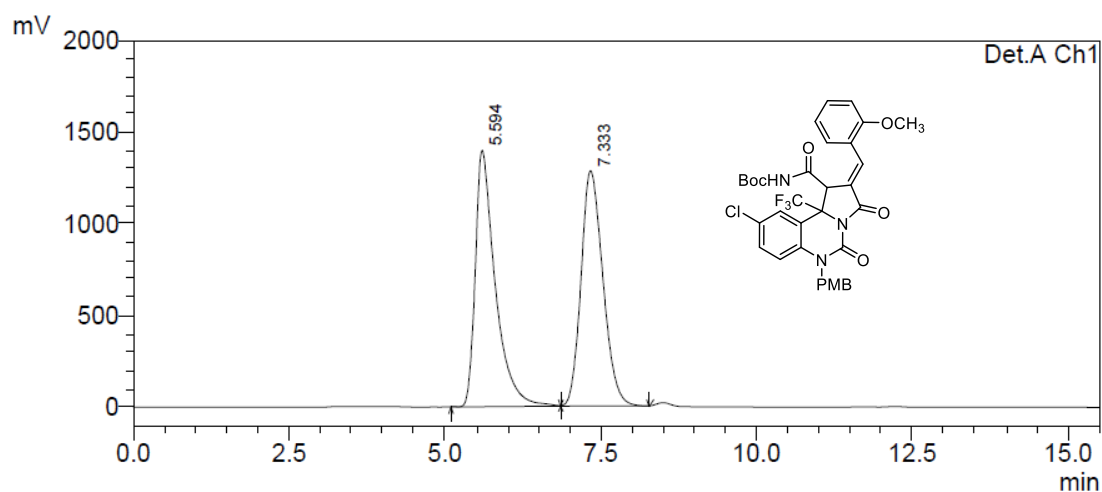

1 Det.A Ch1/254nm

PeakTable

| Peak# | Ret. Time | Area     | Height  | Area %  |
|-------|-----------|----------|---------|---------|
| 1     | 5.594     | 31106586 | 1396927 | 49.840  |
| 2     | 7.333     | 31306277 | 1281047 | 50.160  |
| Total |           | 62412864 |         | 100.000 |

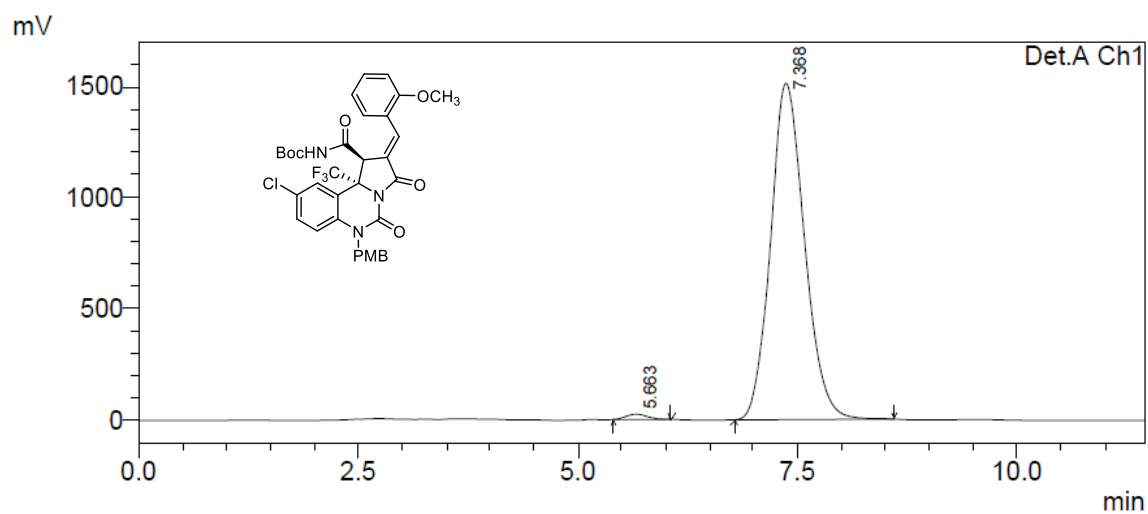

1 Det.A Ch1/254nm

PeakTable

| Peak# | Ret. Time | Area     | Height  | Area %  |
|-------|-----------|----------|---------|---------|
| 1     | 5.663     | 402138   | 23690   | 0.981   |
| 2     | 7.368     | 40574721 | 1508852 | 99.019  |
| Total |           | 40976859 |         | 100.000 |

# $^1\text{H}$ and $^{13}\text{C}$ NMR of 3da

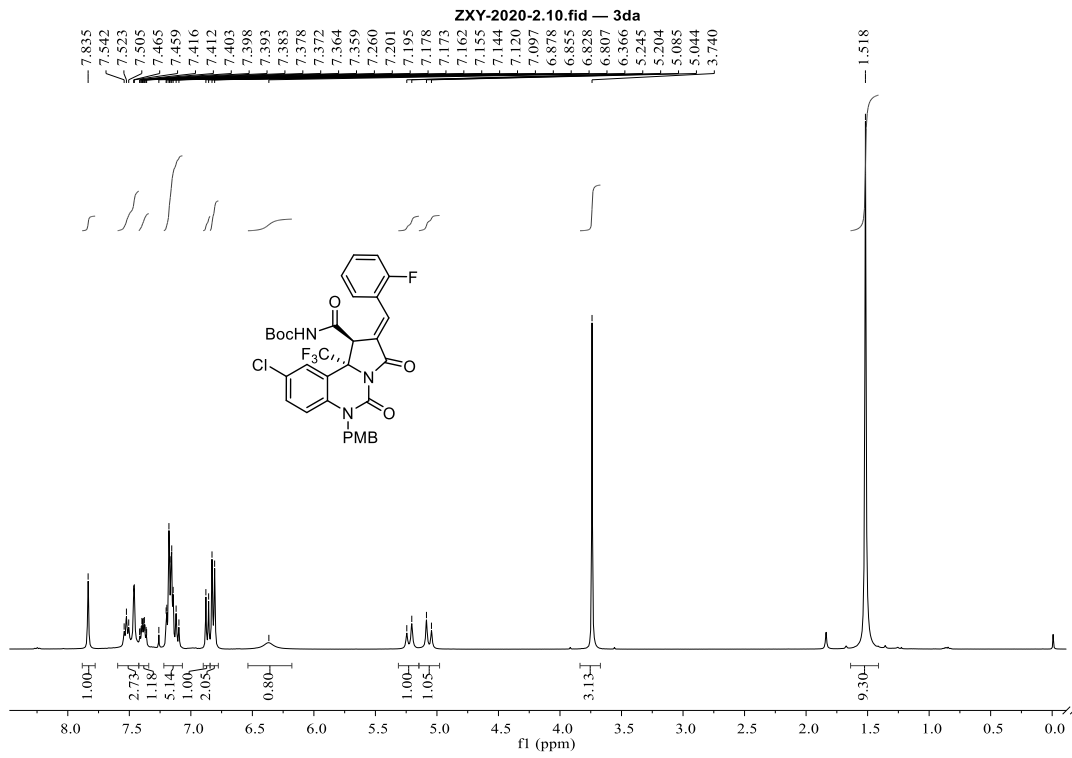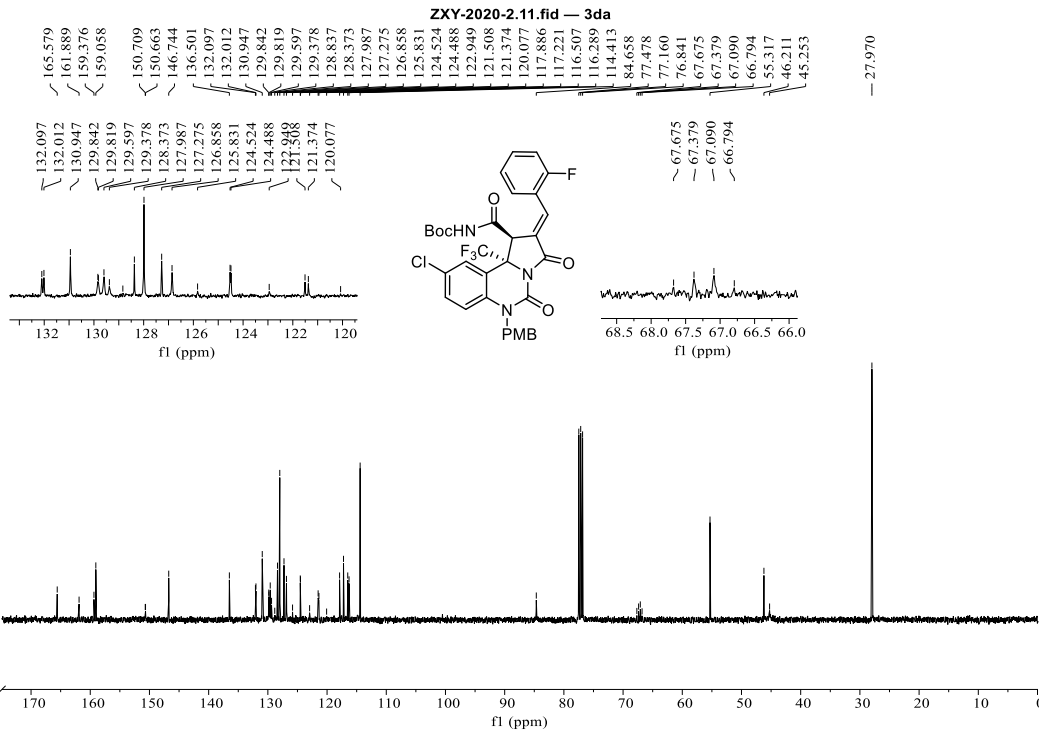

### HPLC of 3da

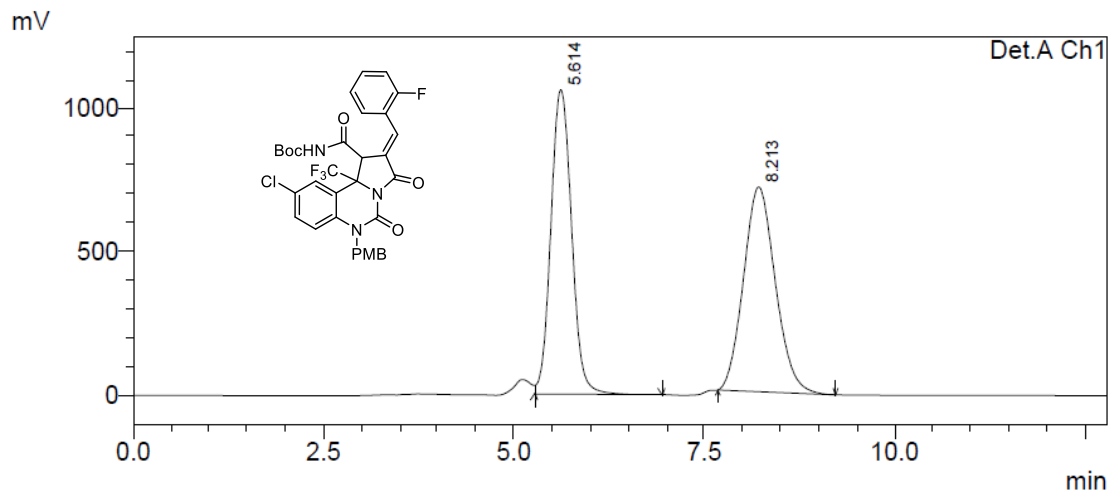

PeakTable

Detector A Ch1 254nm

| Peak# | Ret. Time | Area     | Height  | Area %  |
|-------|-----------|----------|---------|---------|
| 1     | 5.614     | 20082661 | 1059597 | 49.200  |
| 2     | 8.213     | 20735429 | 712113  | 50.800  |
| Total |           | 40818089 |         | 100.000 |

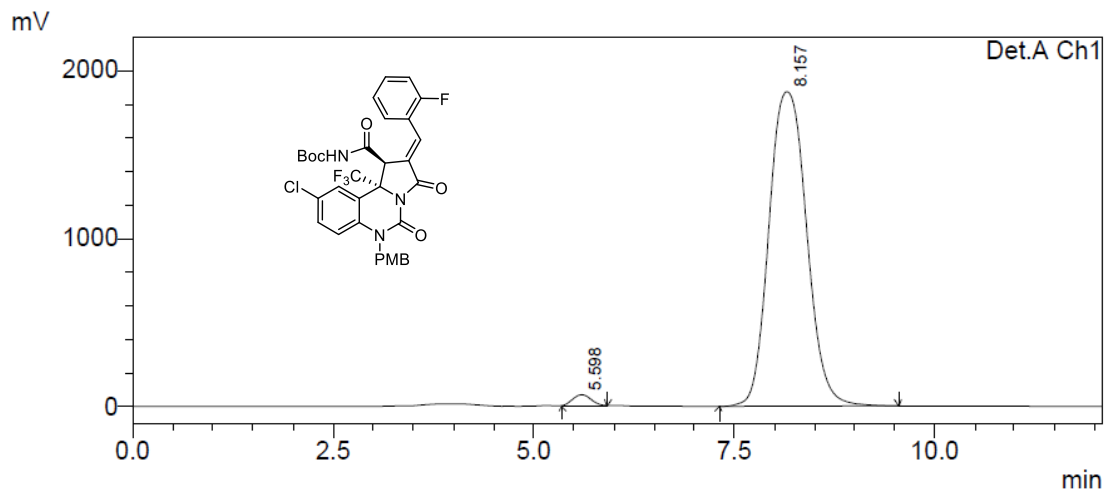

PeakTable

Detector A Ch1 254nm

| Peak# | Ret. Time | Area     | Height  | Area %  |
|-------|-----------|----------|---------|---------|
| 1     | 5.598     | 984756   | 63680   | 1.585   |
| 2     | 8.157     | 61160402 | 1870296 | 98.415  |
| Total |           | 62145157 |         | 100.000 |

# $^1\text{H}$ and $^{13}\text{C}$ NMR of **3ea**

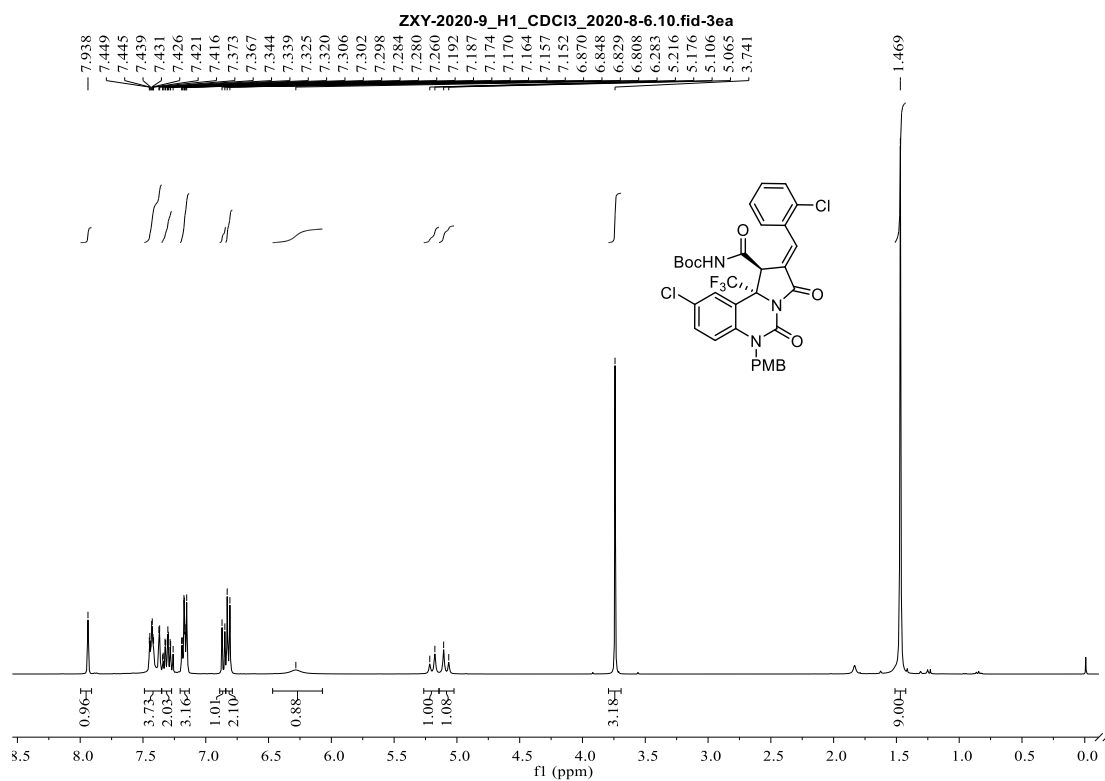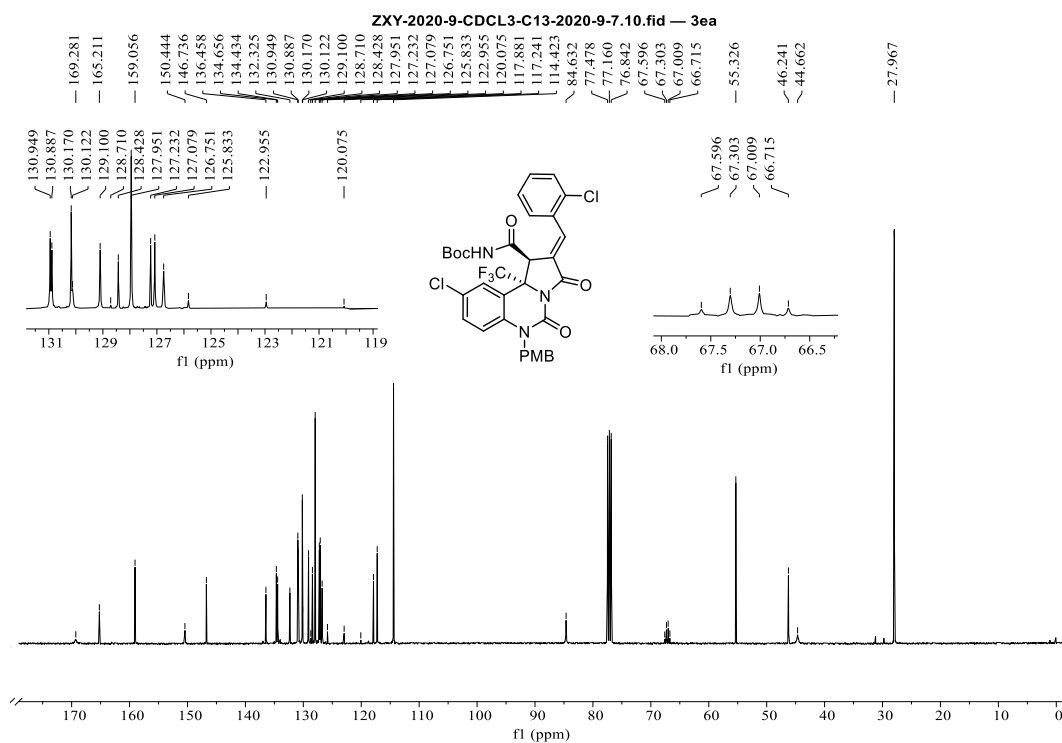

### HPLC of 3ea

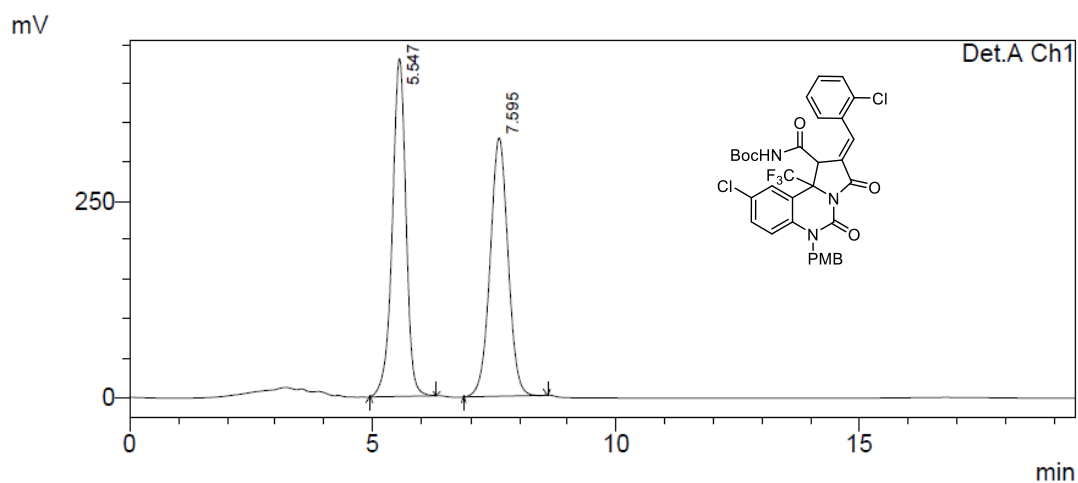

PeakTable

Detector A Ch1 254nm

| Peak# | Ret. Time | Area     | Height | Area %  |
|-------|-----------|----------|--------|---------|
| 1     | 5.547     | 8414164  | 430534 | 49.980  |
| 2     | 7.595     | 8420941  | 329018 | 50.020  |
| Total |           | 16835105 |        | 100.000 |

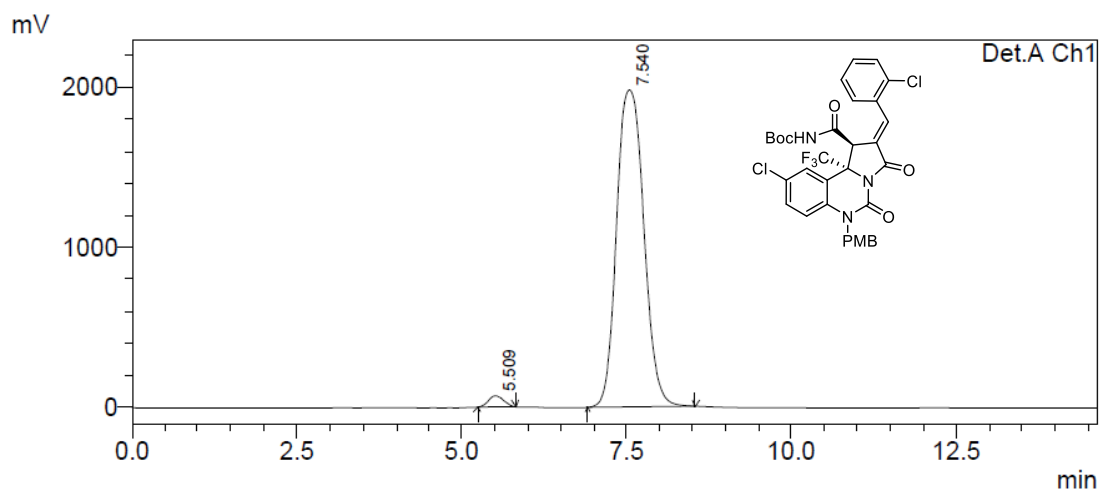

PeakTable

Detector A Ch1 254nm

| Peak# | Ret. Time | Area     | Height  | Area %  |
|-------|-----------|----------|---------|---------|
| 1     | 5.509     | 1124457  | 69650   | 1.938   |
| 2     | 7.540     | 56908339 | 1977831 | 98.062  |
| Total |           | 58032796 |         | 100.000 |

# $^1\text{H}$ and $^{13}\text{C}$ NMR of **3fa**

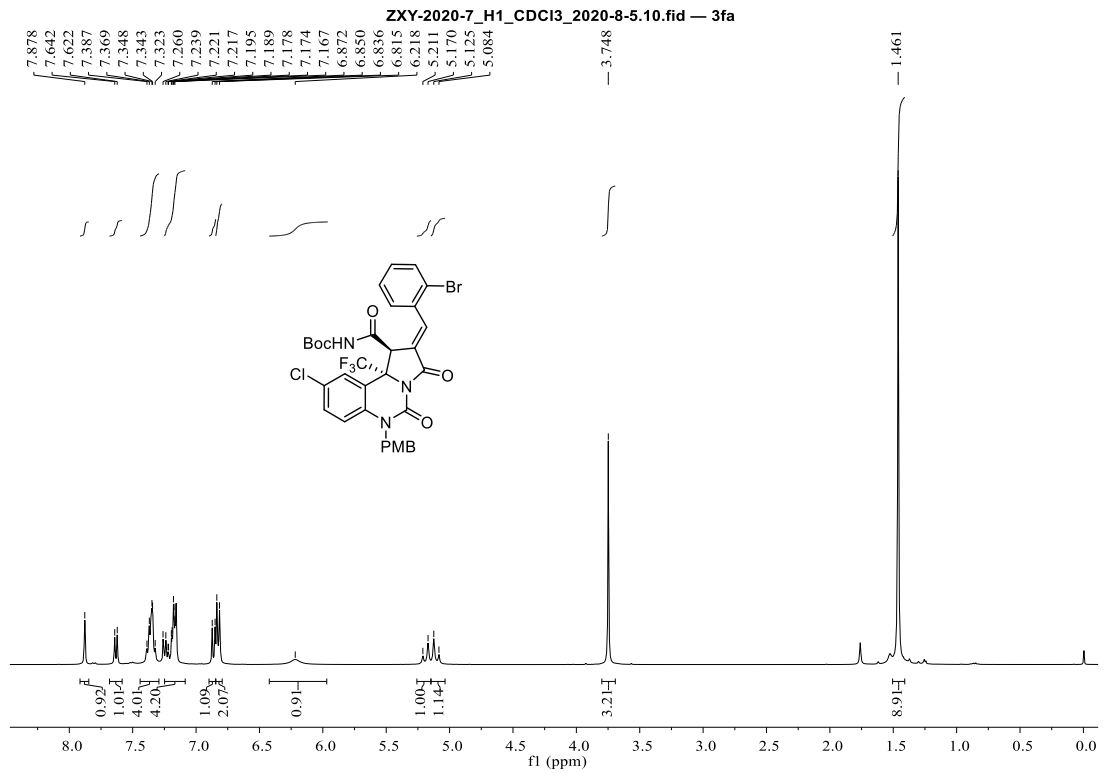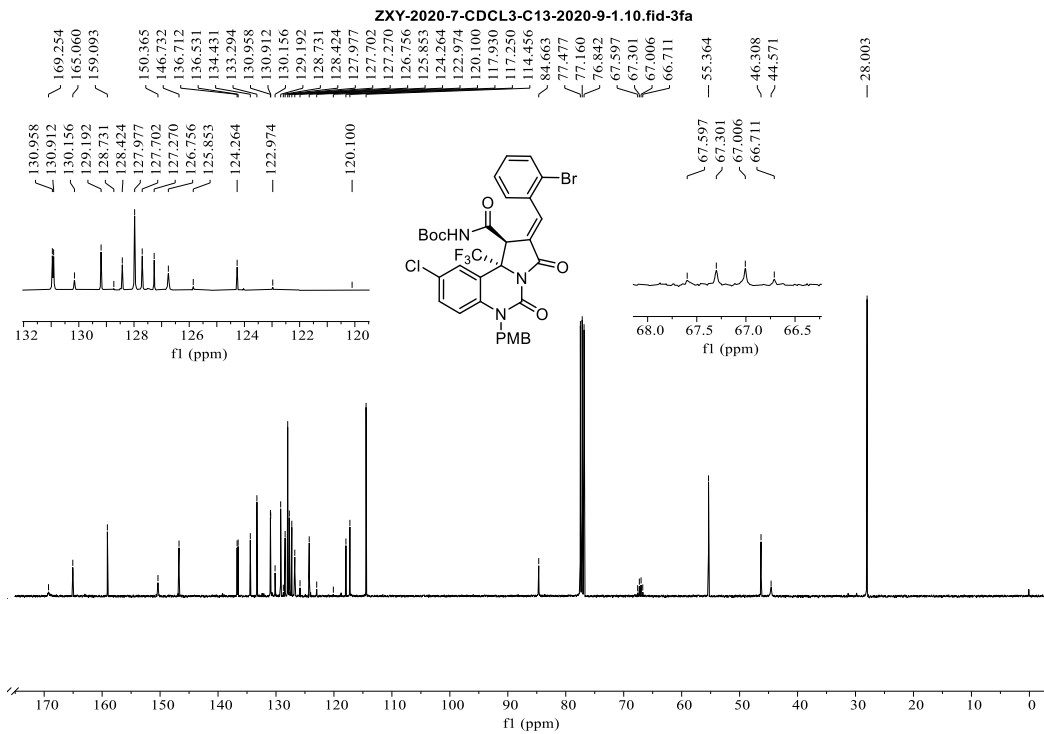

### HPLC of 3fa

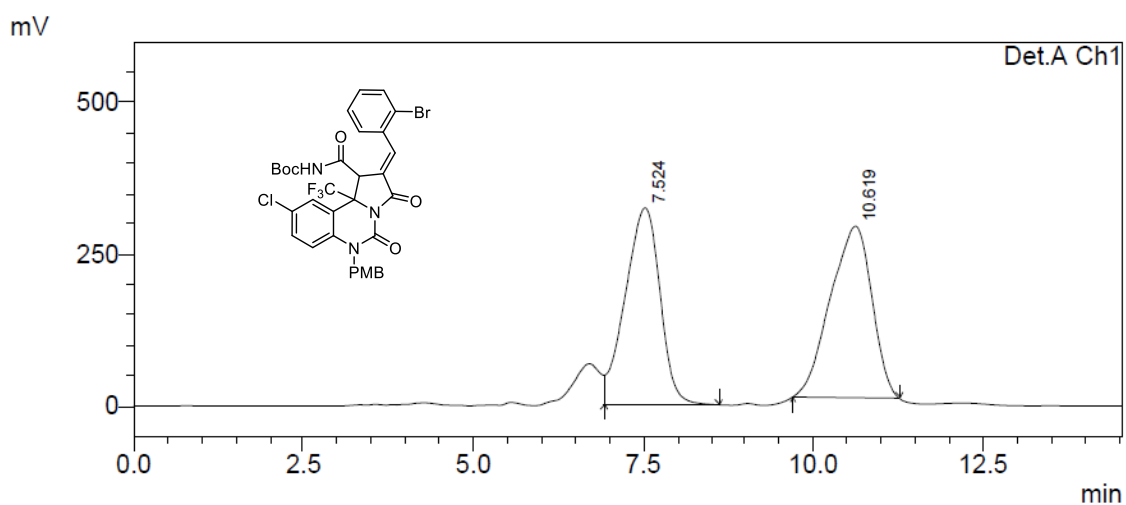

PeakTable

Detector A Ch1 254nm

| Peak# | Ret. Time | Area     | Height | Area %  |
|-------|-----------|----------|--------|---------|
| 1     | 7.524     | 11562434 | 324458 | 49.011  |
| 2     | 10.619    | 12029139 | 282762 | 50.989  |
| Total |           | 23591573 |        | 100.000 |

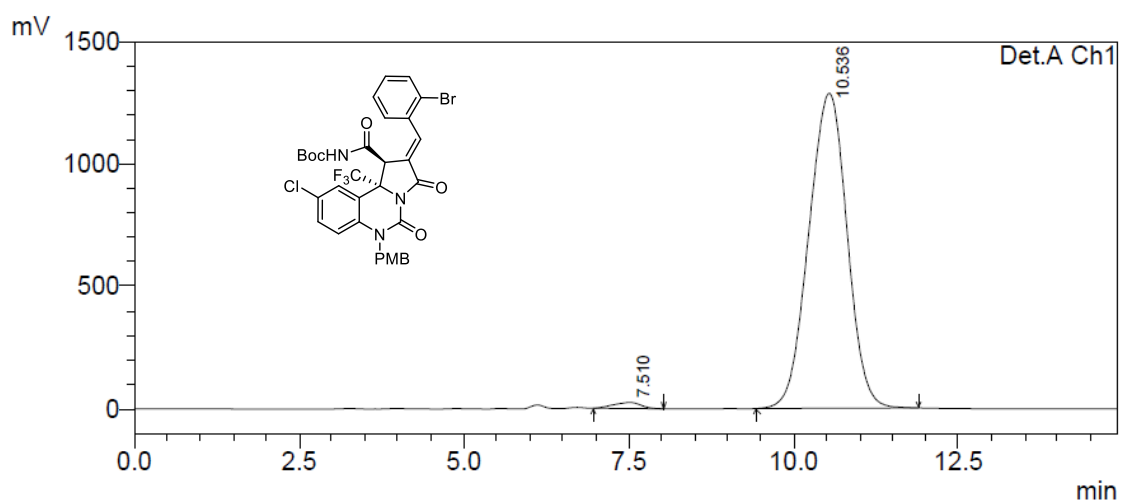

PeakTable

Detector A Ch1 254nm

| Peak# | Ret. Time | Area     | Height  | Area %  |
|-------|-----------|----------|---------|---------|
| 1     | 7.510     | 715334   | 25023   | 1.357   |
| 2     | 10.536    | 52001502 | 1285394 | 98.643  |
| Total |           | 52716836 |         | 100.000 |



# <sup>1</sup>H and <sup>13</sup>C NMR of 3ga

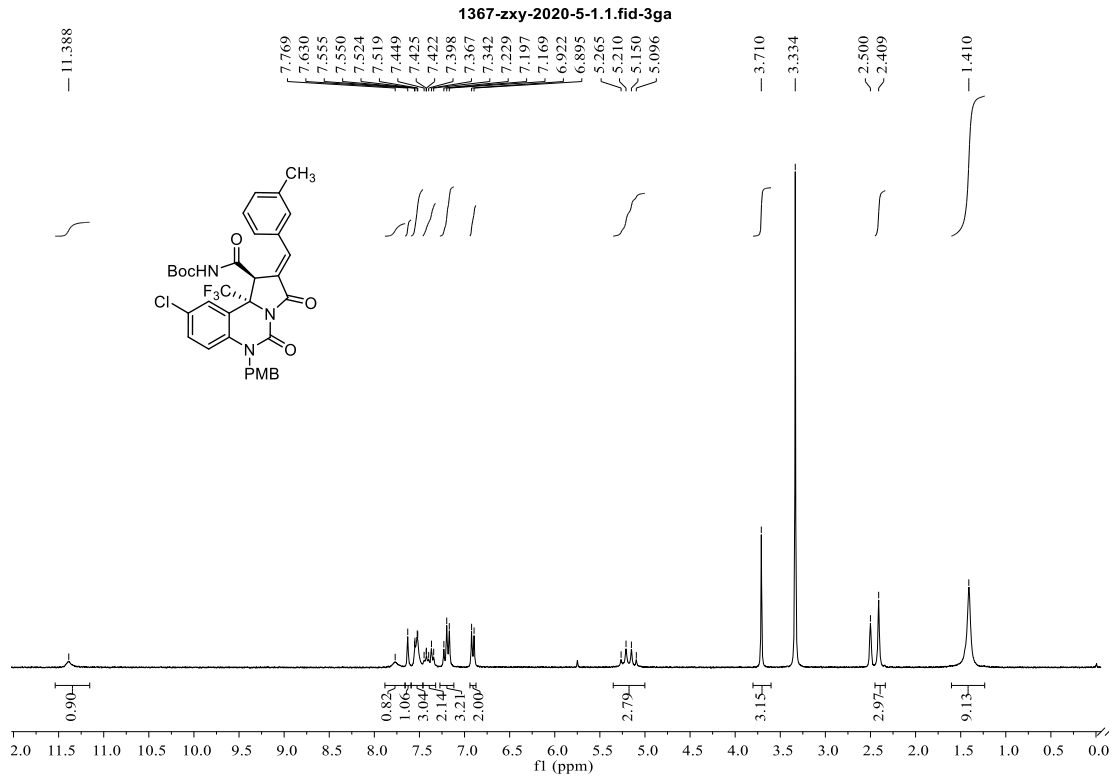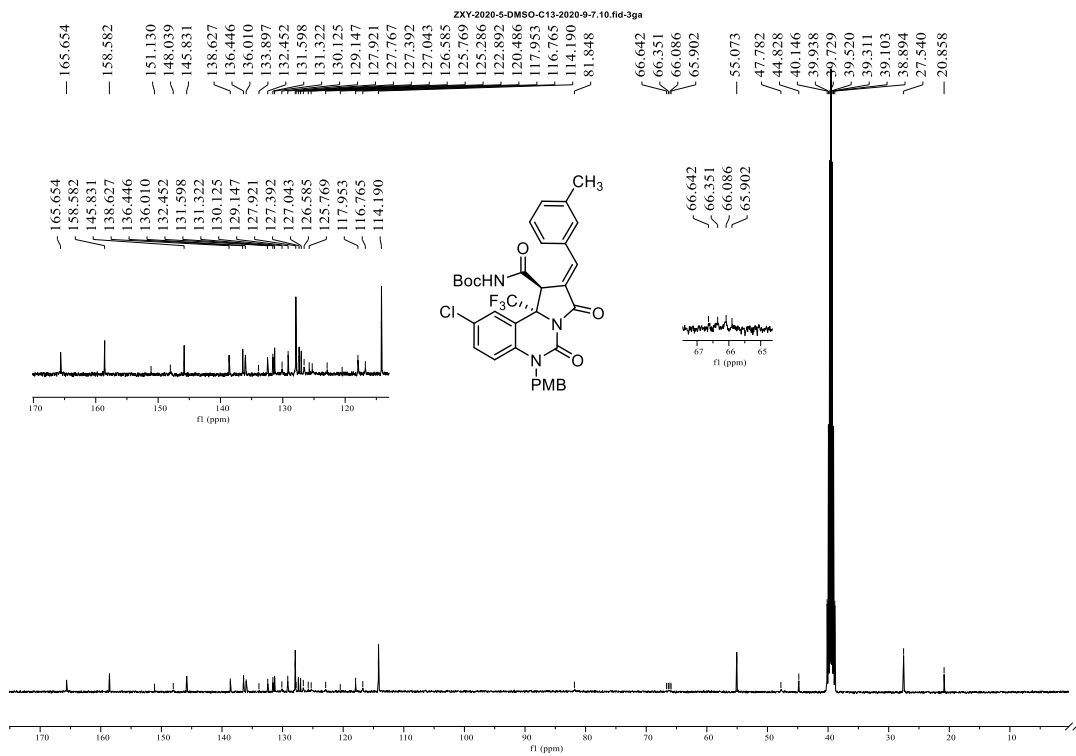

### HPLC of 3ga

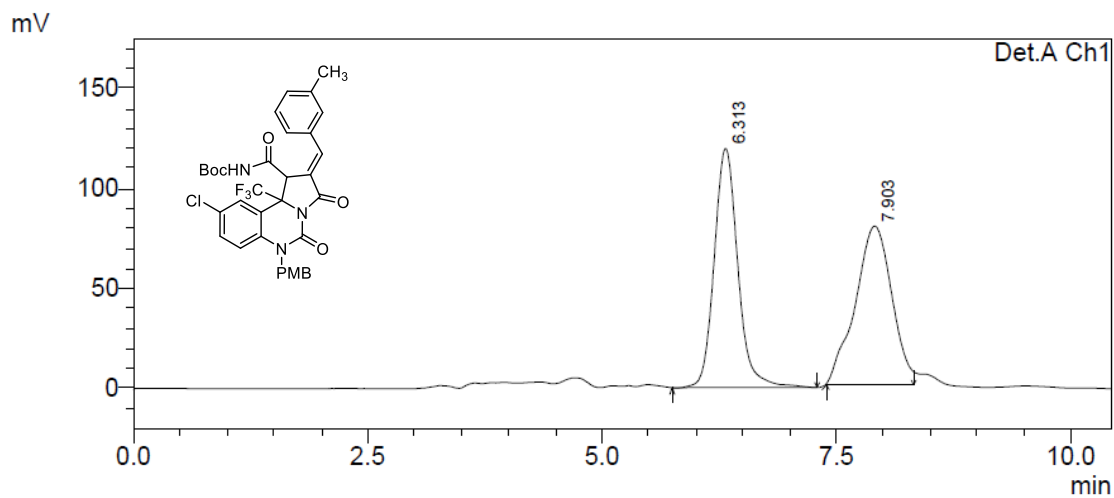

PeakTable

Detector A Ch1 254nm

| Peak# | Ret. Time | Area    | Height | Area %  |
|-------|-----------|---------|--------|---------|
| 1     | 6.313     | 2101287 | 119566 | 49.431  |
| 2     | 7.903     | 2149644 | 79279  | 50.569  |
| Total |           | 4250932 |        | 100.000 |

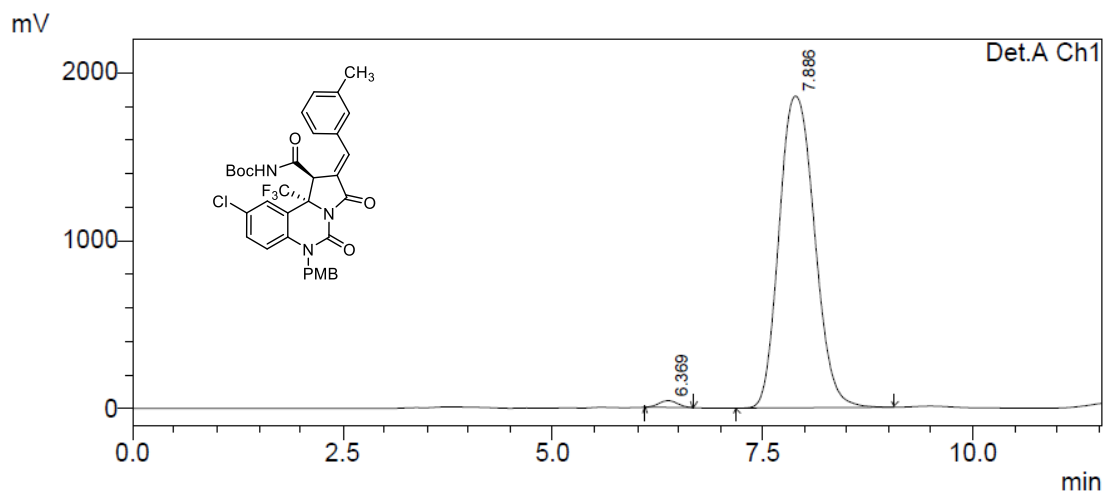

PeakTable

Detector A Ch1 254nm

| Peak# | Ret. Time | Area     | Height  | Area %  |
|-------|-----------|----------|---------|---------|
| 1     | 6.369     | 637346   | 40678   | 1.157   |
| 2     | 7.886     | 54426006 | 1853811 | 98.843  |
| Total |           | 55063351 |         | 100.000 |

# $^1\text{H}$ and $^{13}\text{C}$ NMR of **3ha**

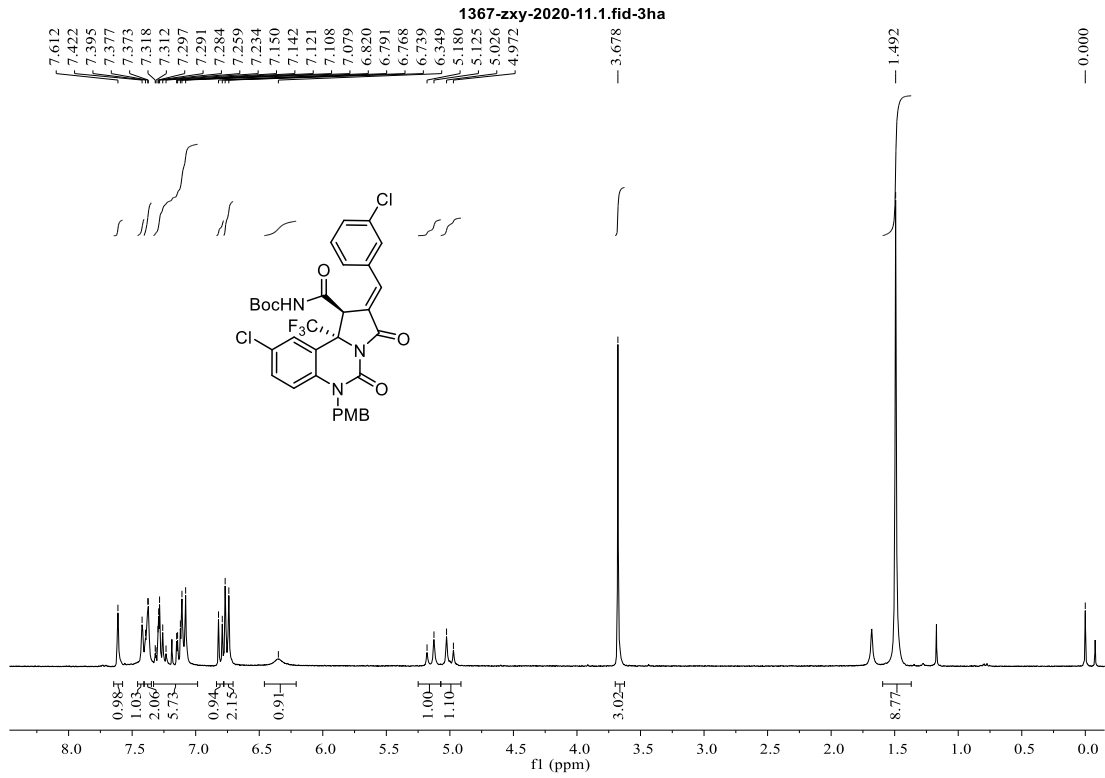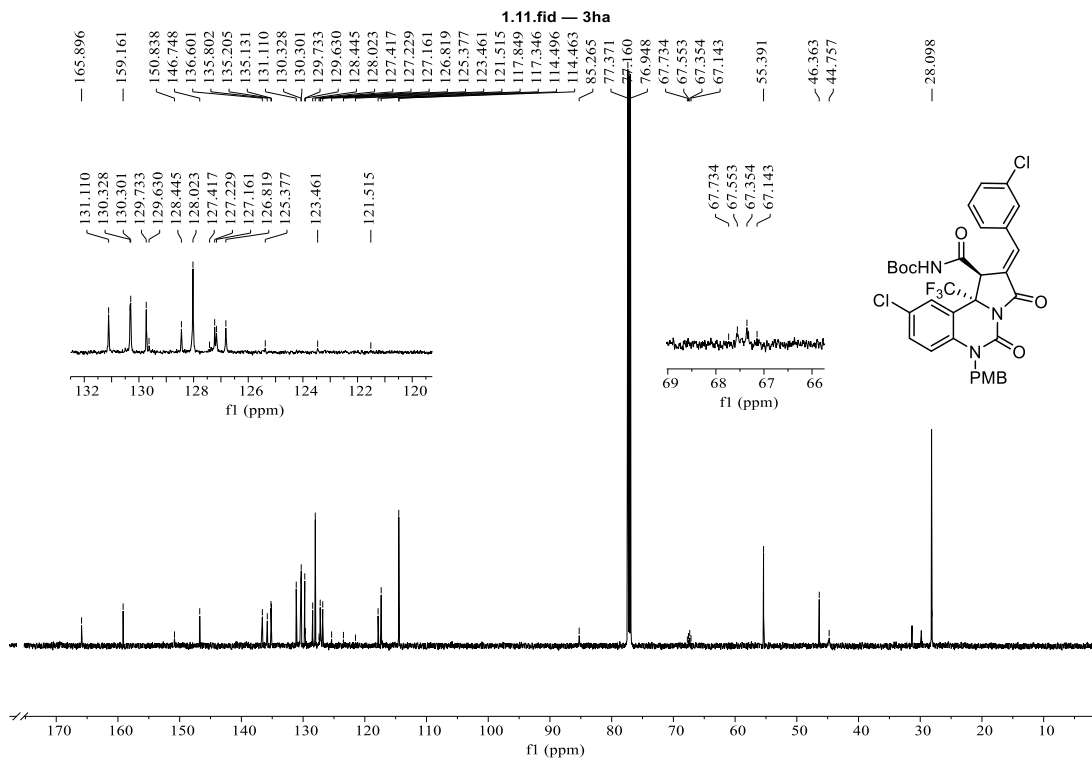

### HPLC of 3ha

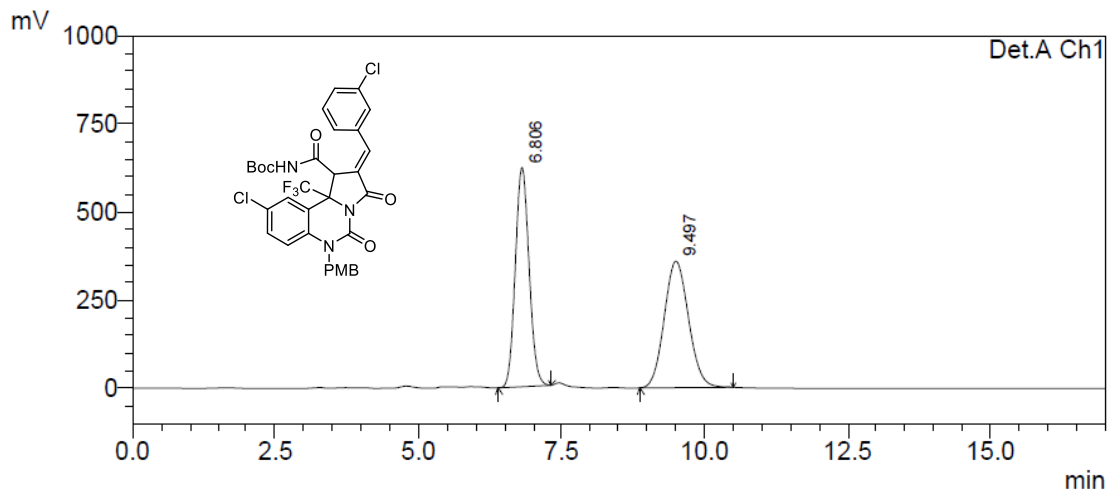

PeakTable

Detector A Ch1 254nm

| Peak# | Ret. Time | Area     | Height | Area %  |
|-------|-----------|----------|--------|---------|
| 1     | 6.806     | 10401481 | 621456 | 49.497  |
| 2     | 9.497     | 10612955 | 358695 | 50.503  |
| Total |           | 21014436 |        | 100.000 |

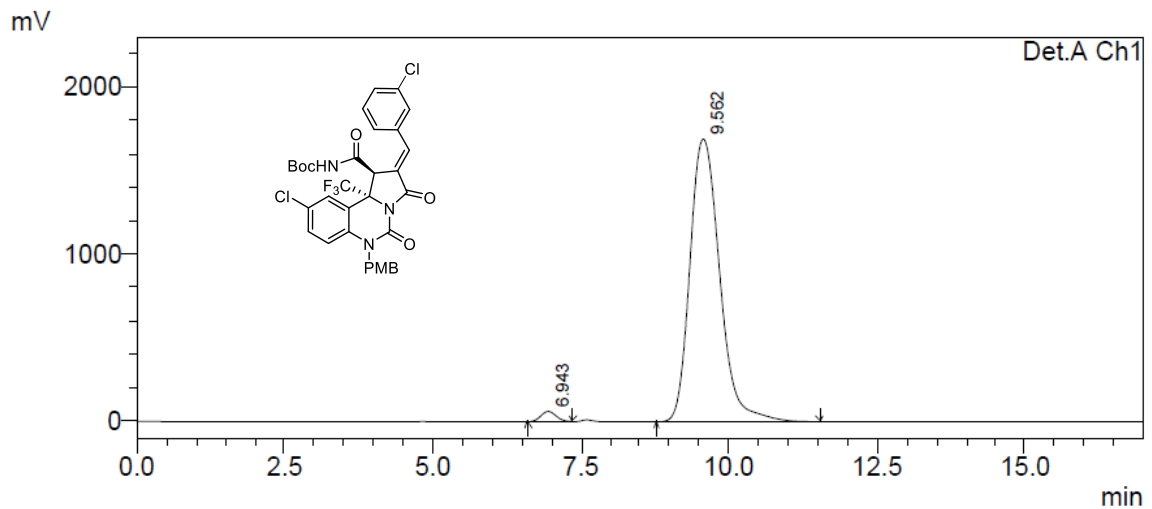

PeakTable

Detector A Ch1 254nm

| Peak# | Ret. Time | Area     | Height  | Area %  |
|-------|-----------|----------|---------|---------|
| 1     | 6.943     | 1089589  | 60479   | 1.812   |
| 2     | 9.562     | 59048095 | 1690038 | 98.188  |
| Total |           | 60137683 |         | 100.000 |

# $^1\text{H}$ and $^{13}\text{C}$ NMR of **3ia**

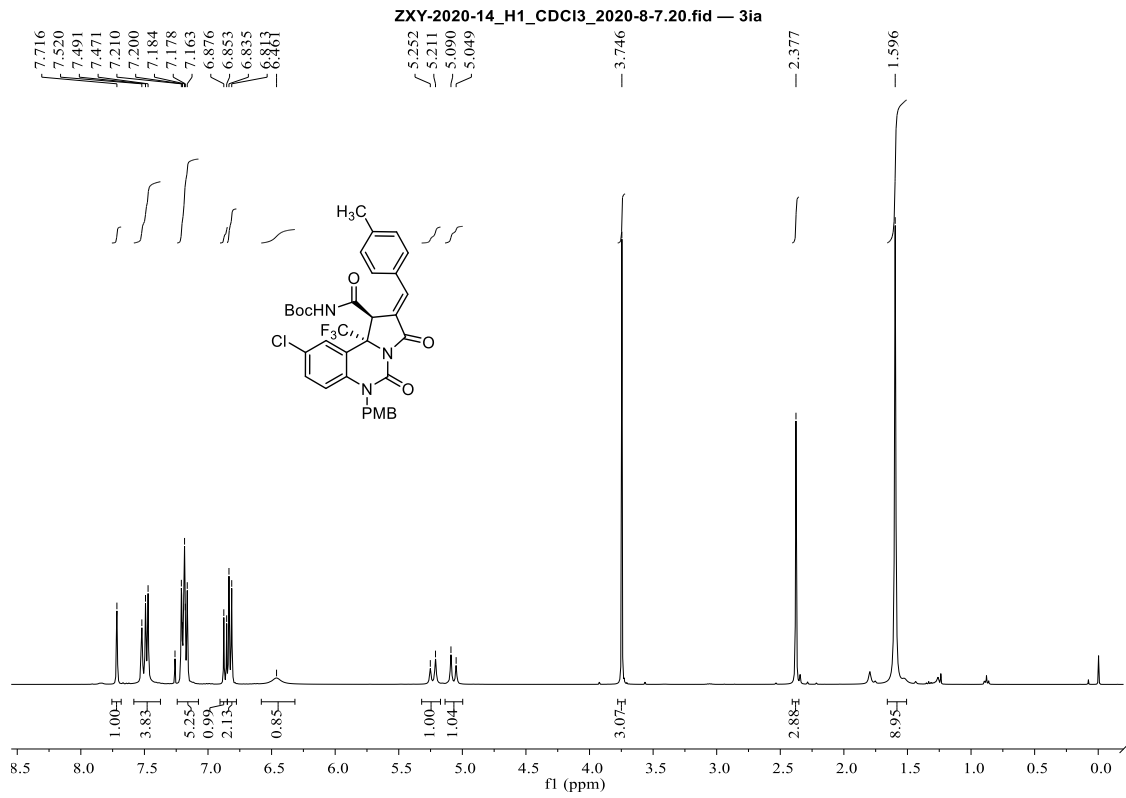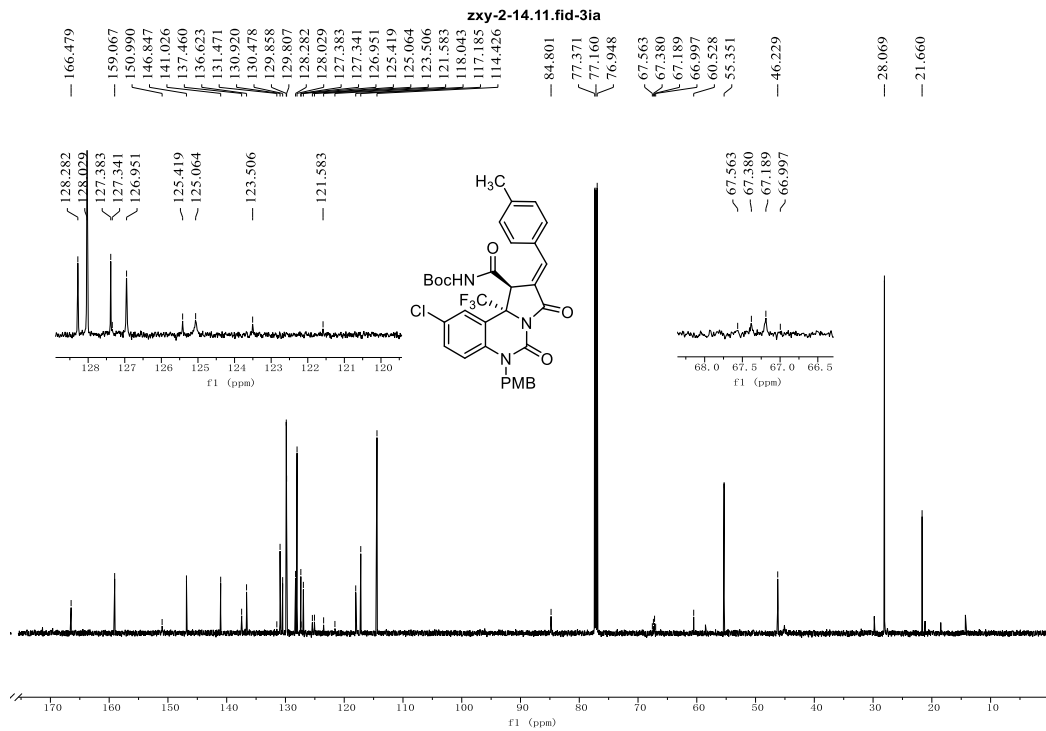

### HPLC of 3ia

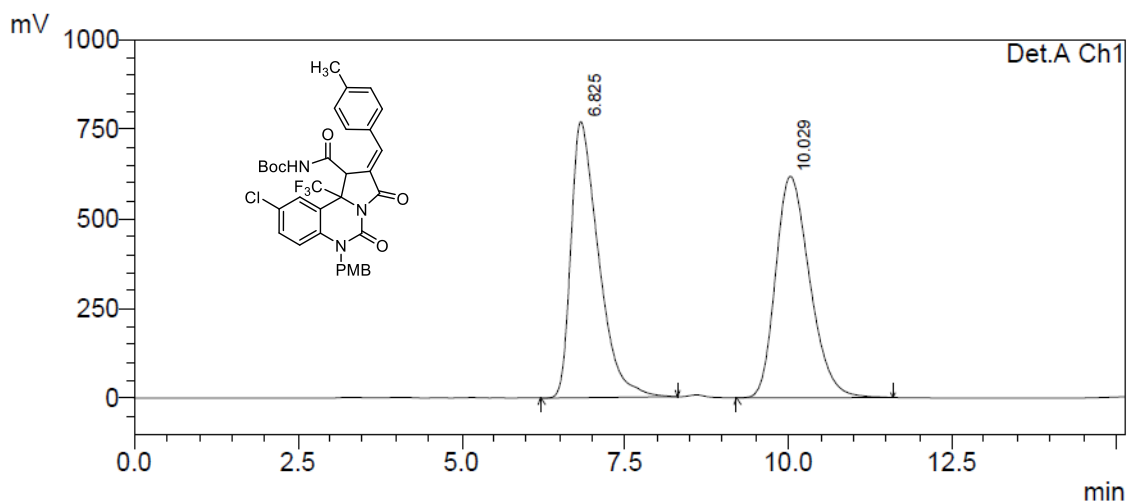

PeakTable

Detector A Ch1 254nm

| Peak# | Ret. Time | Area     | Height | Area %  |
|-------|-----------|----------|--------|---------|
| 1     | 6.825     | 22566967 | 769015 | 50.156  |
| 2     | 10.029    | 22426197 | 616829 | 49.844  |
| Total |           | 44993164 |        | 100.000 |

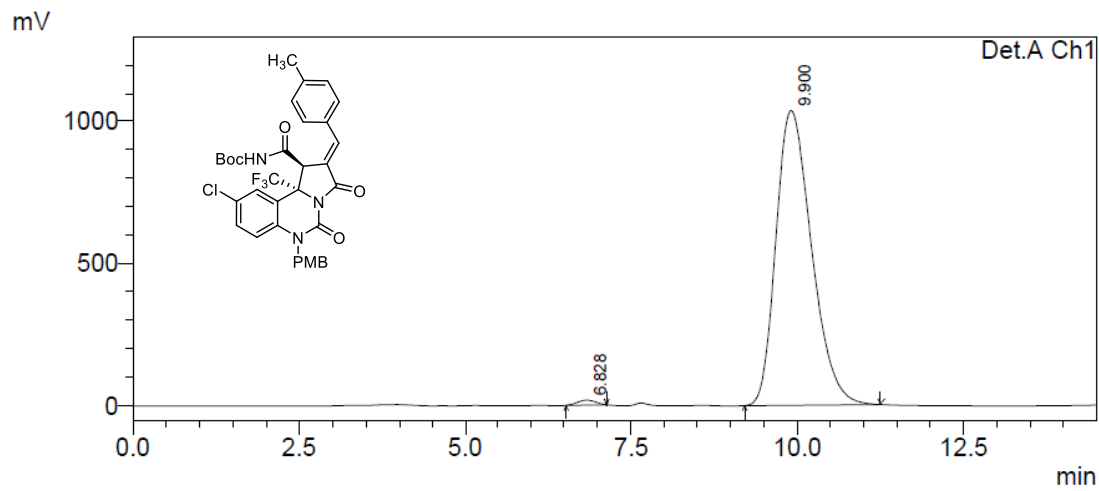

PeakTable

Detector A Ch1 254nm

| Peak# | Ret. Time | Area     | Height  | Area %  |
|-------|-----------|----------|---------|---------|
| 1     | 6.828     | 330028   | 17541   | 0.846   |
| 2     | 9.900     | 38697940 | 1036705 | 99.154  |
| Total |           | 39027968 |         | 100.000 |

# $^1\text{H}$ and $^{13}\text{C}$ NMR of **3ja**

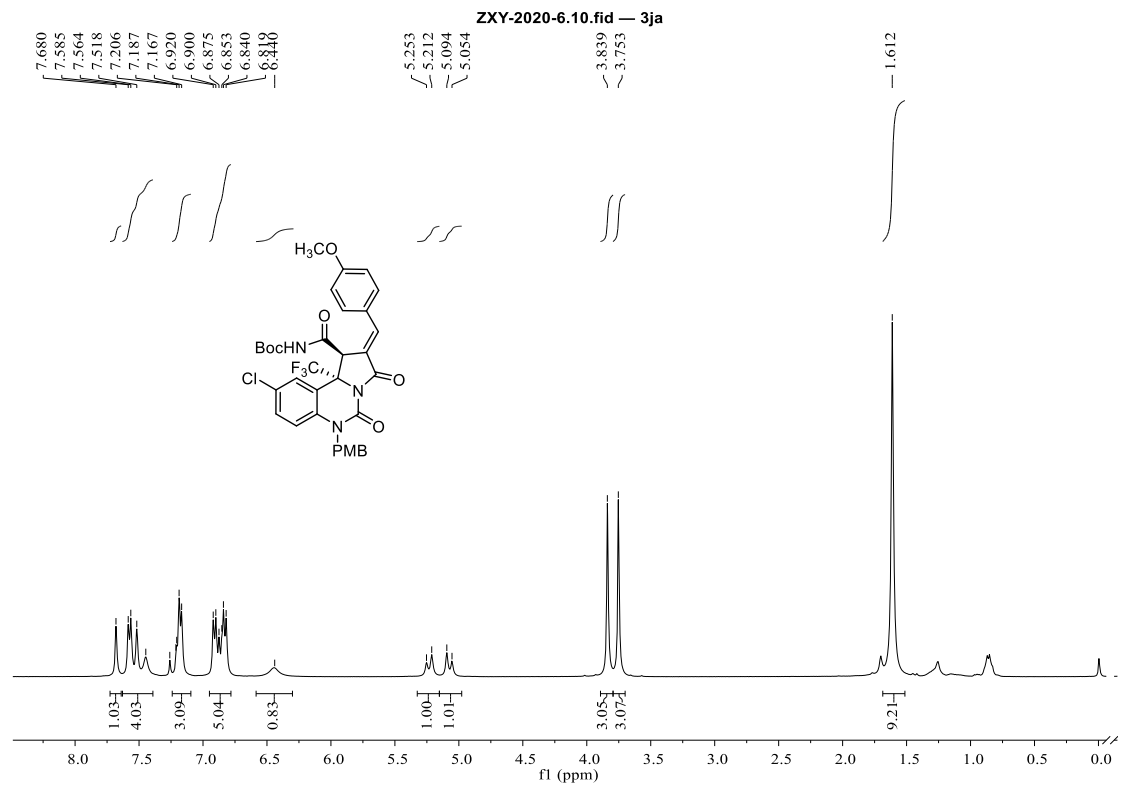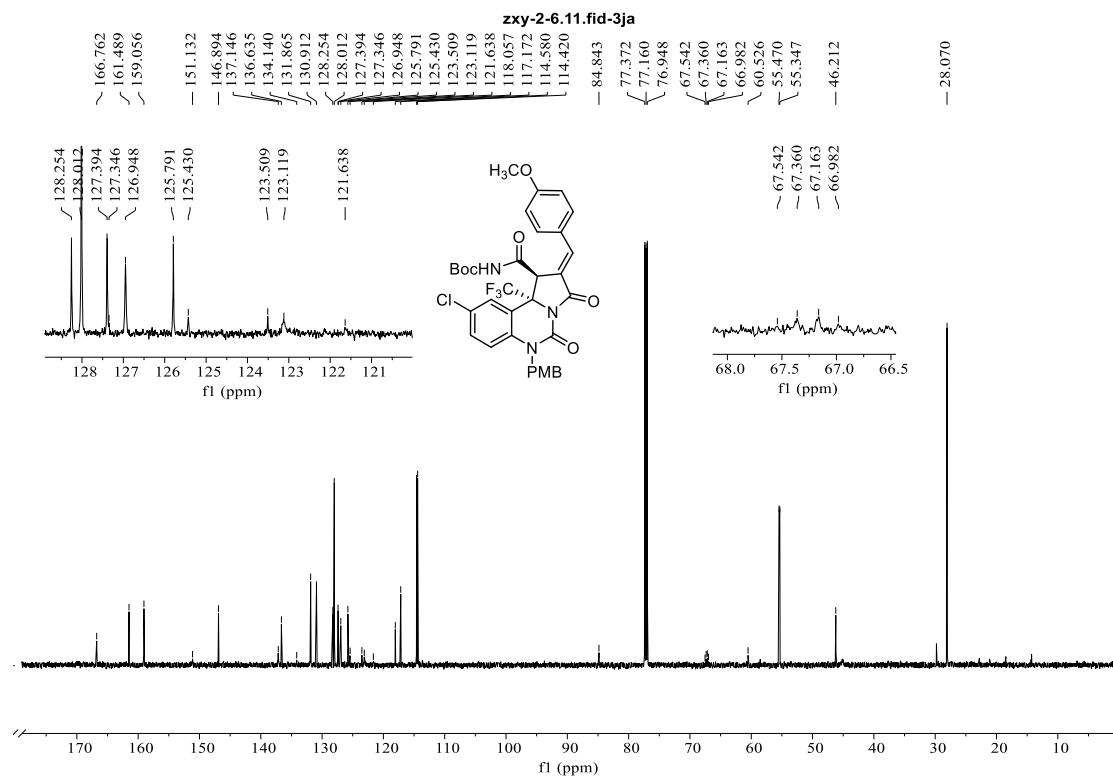

### HPLC of 3ja

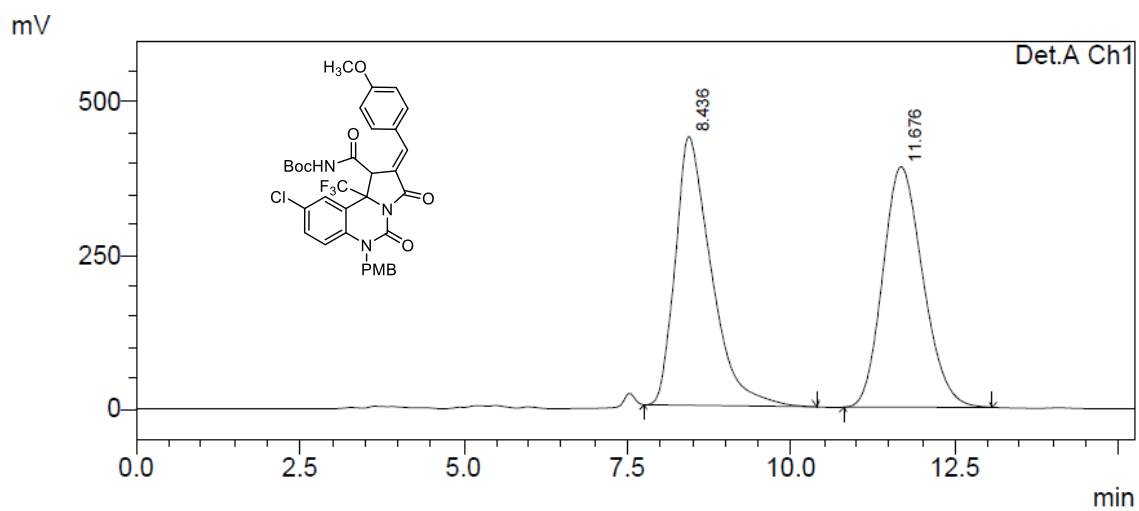

PeakTable

Detector A Ch1 254nm

| Peak# | Ret. Time | Area     | Height | Area %  |
|-------|-----------|----------|--------|---------|
| 1     | 8.436     | 16745927 | 438276 | 49.987  |
| 2     | 11.676    | 16754931 | 392243 | 50.013  |
| Total |           | 33500858 |        | 100.000 |

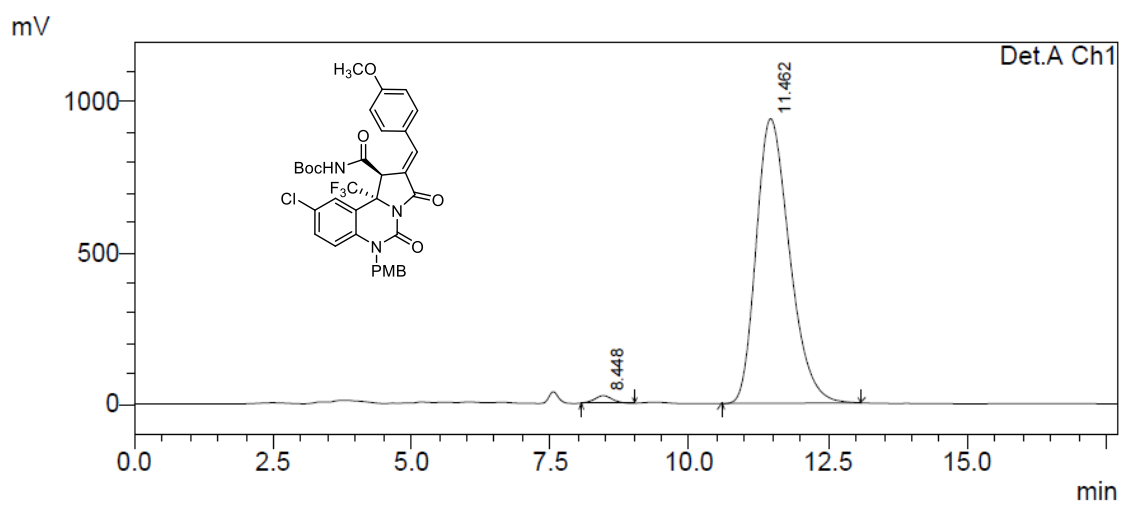

PeakTable

Detector A Ch1 254nm

| Peak# | Ret. Time | Area     | Height | Area %  |
|-------|-----------|----------|--------|---------|
| 1     | 8.448     | 535349   | 24655  | 1.338   |
| 2     | 11.462    | 39486994 | 942771 | 98.662  |
| Total |           | 40022343 |        | 100.000 |



# $^1\text{H}$ and $^{13}\text{C}$ NMR of **3ka**

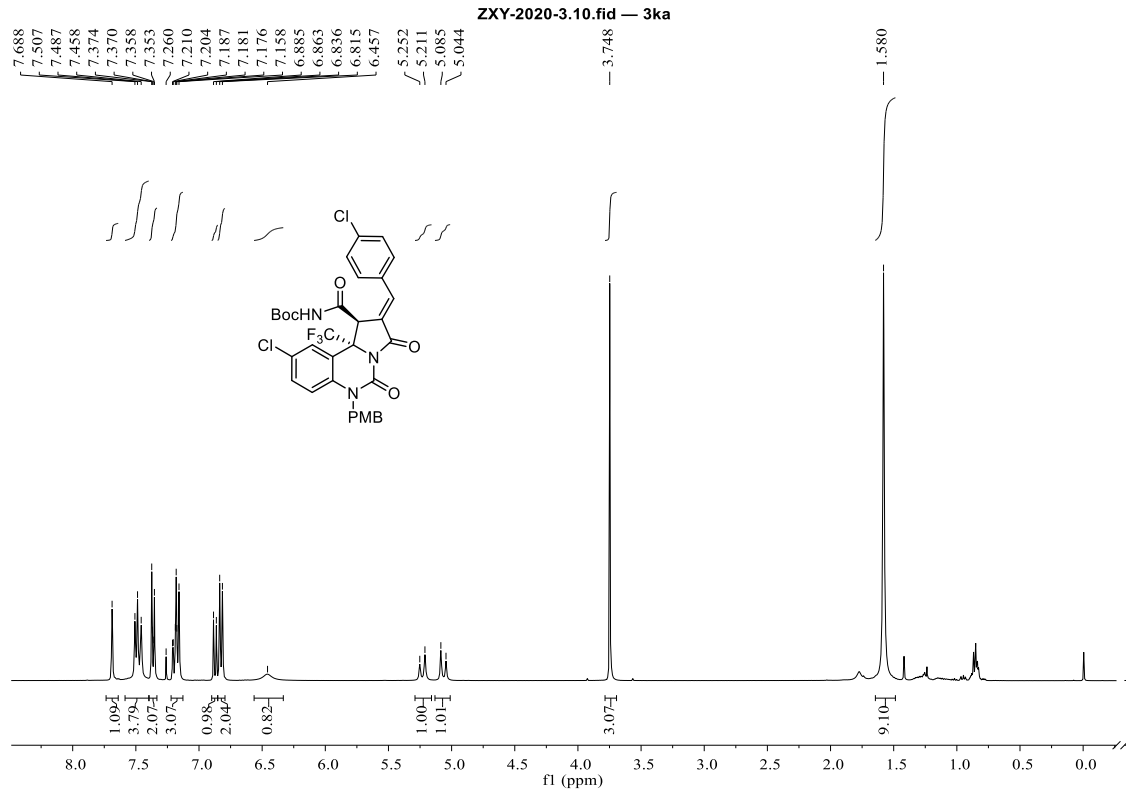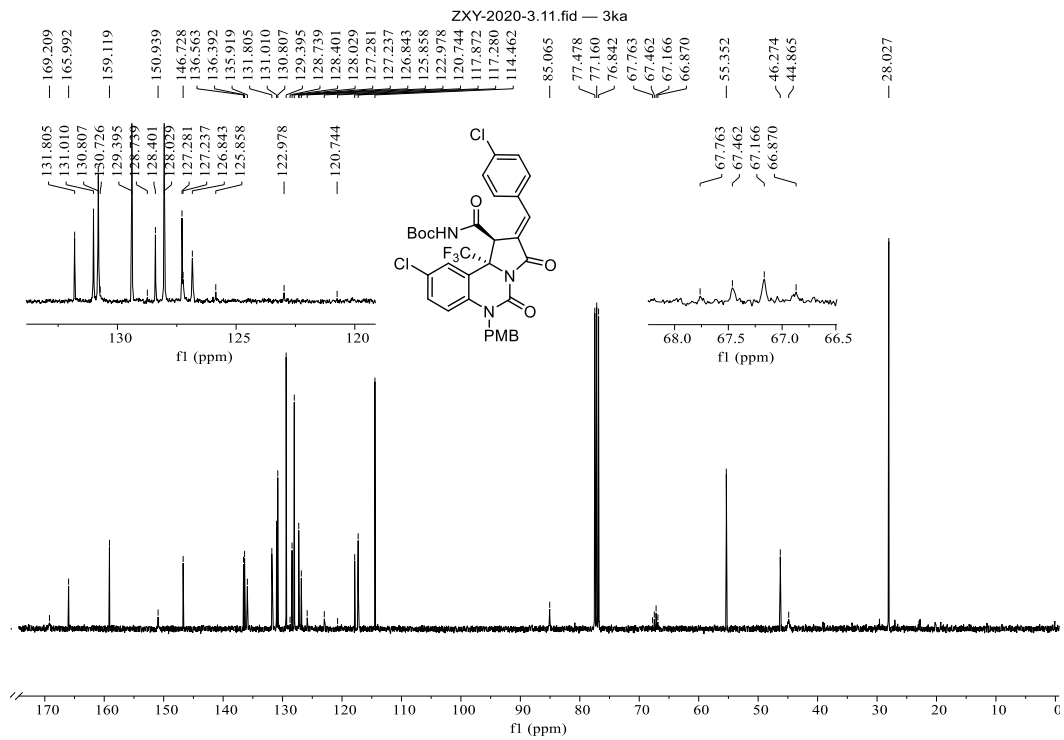

### HPLC of 3ka

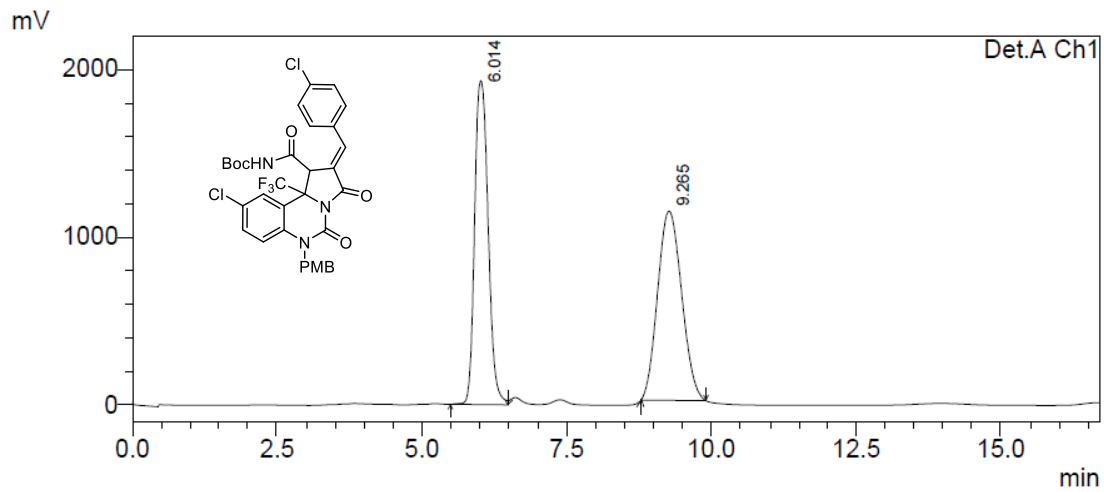

PeakTable

Detector A Ch1 254nm

| Peak# | Ret. Time | Area     | Height  | Area %  |
|-------|-----------|----------|---------|---------|
| 1     | 6.014     | 31431175 | 1930295 | 49.147  |
| 2     | 9.265     | 32522799 | 1127785 | 50.853  |
| Total |           | 63953974 |         | 100.000 |

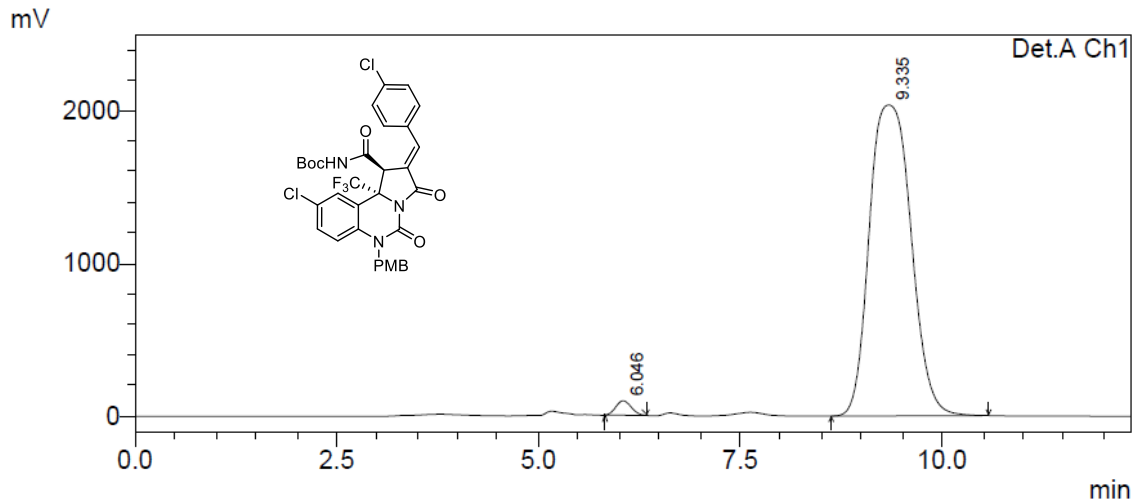

PeakTable

Detector A Ch1 254nm

| Peak# | Ret. Time | Area     | Height  | Area %  |
|-------|-----------|----------|---------|---------|
| 1     | 6.046     | 1258643  | 94736   | 1.688   |
| 2     | 9.335     | 73320637 | 2034579 | 98.312  |
| Total |           | 74579280 |         | 100.000 |

# <sup>1</sup>H and <sup>13</sup>C NMR of 3a

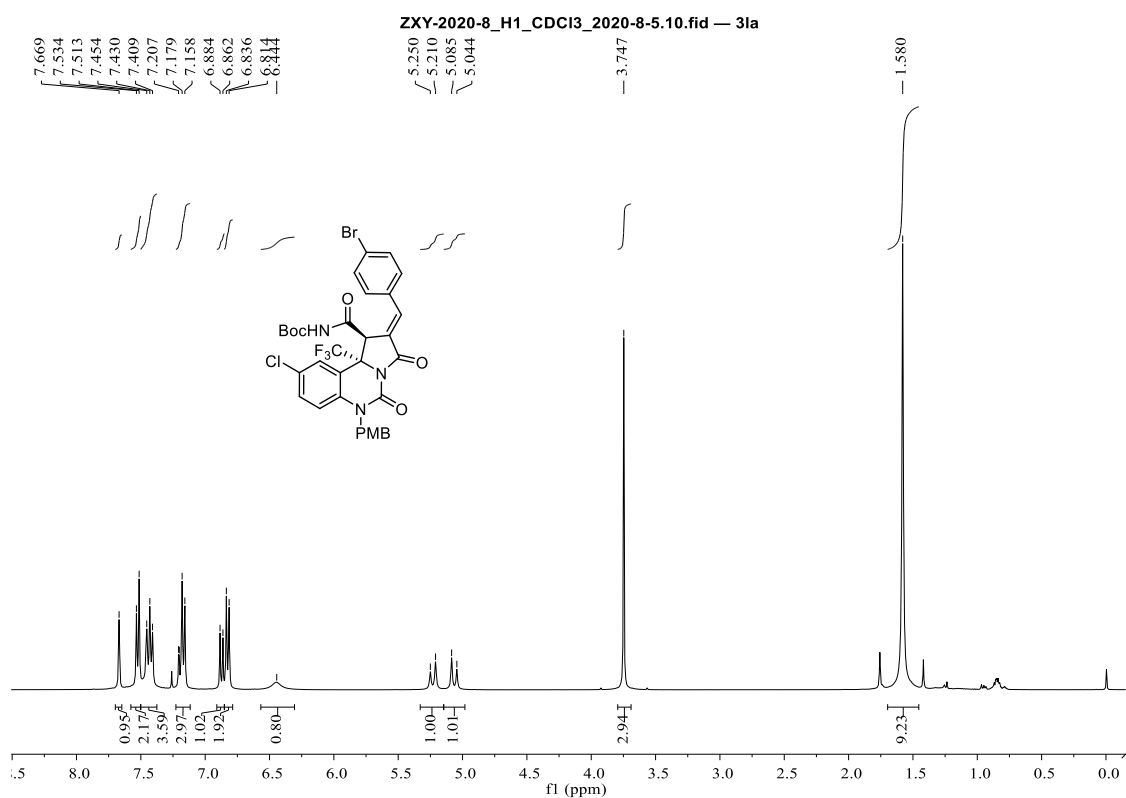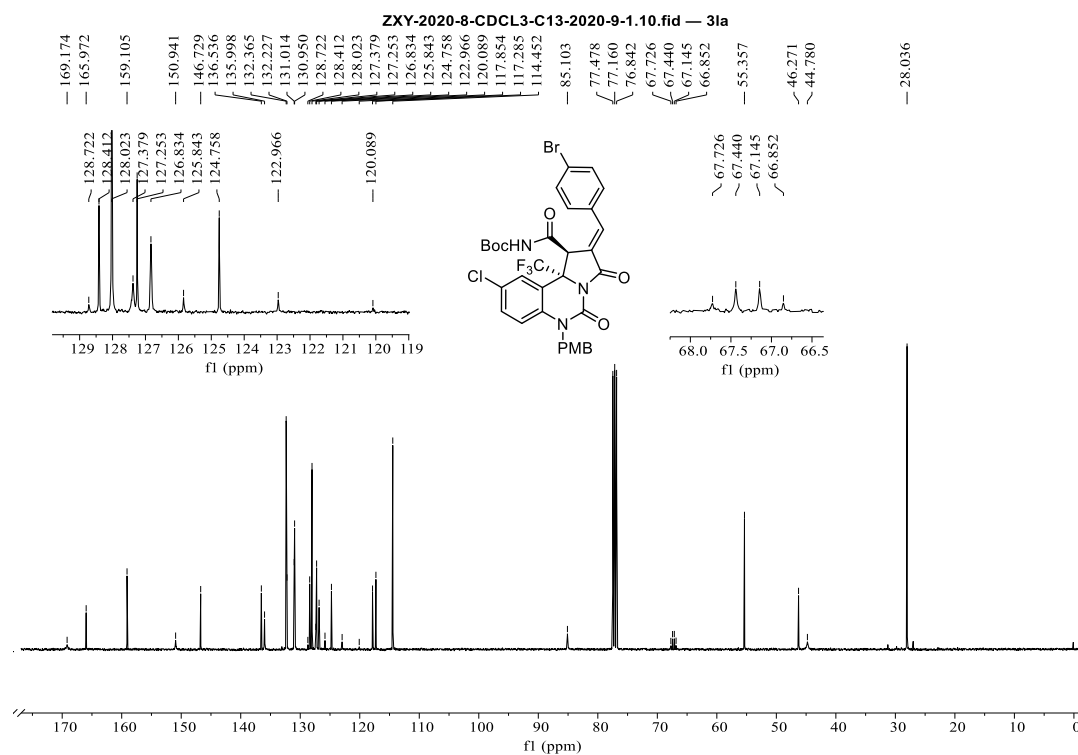



<sup>1</sup>H and <sup>13</sup>C NMR of **3ma**

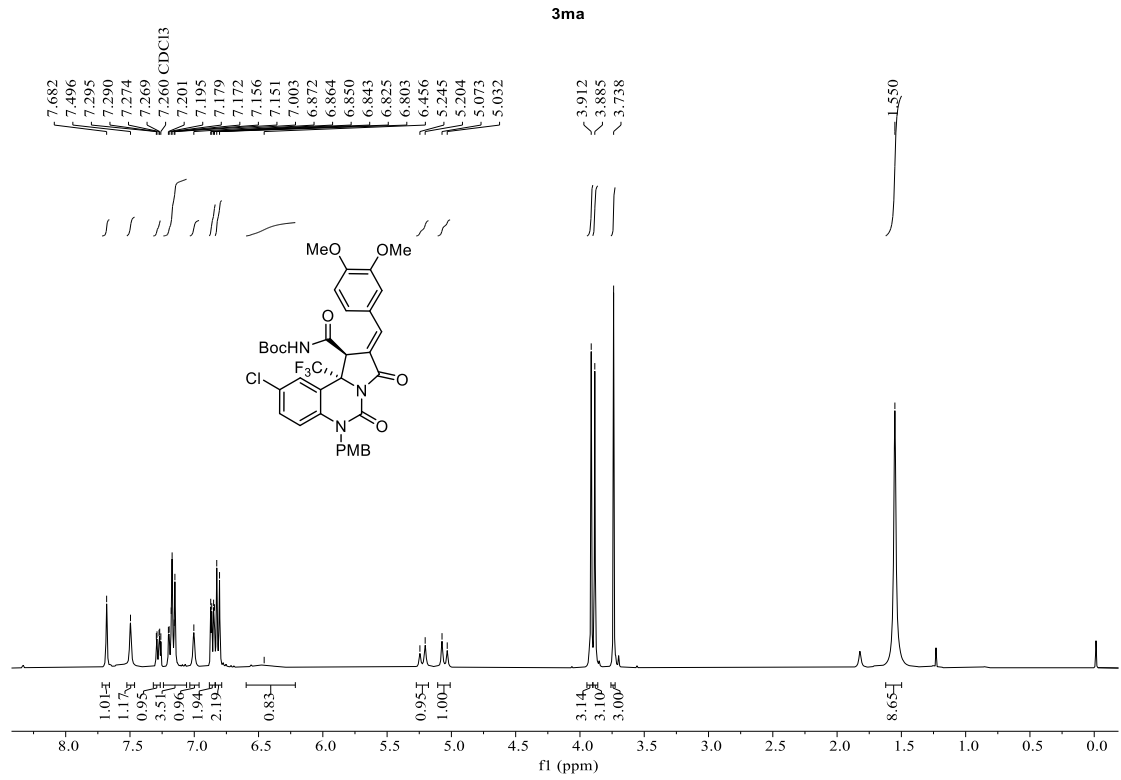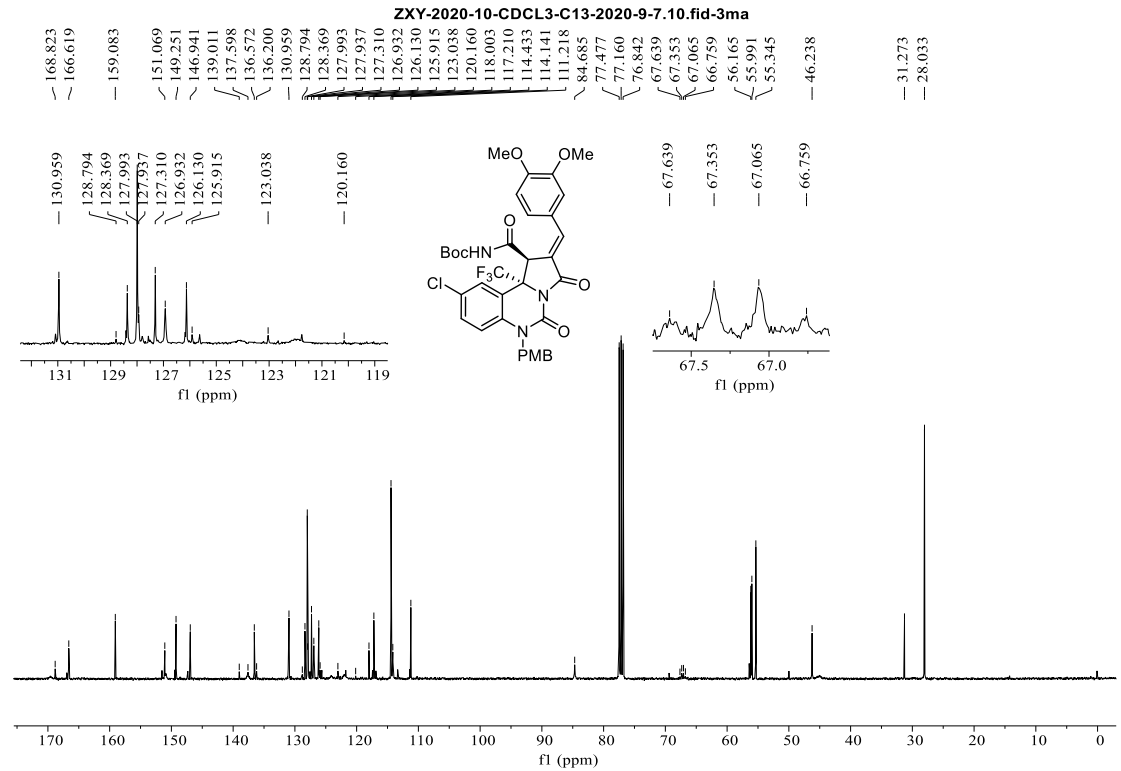

### HPLC of 3ma

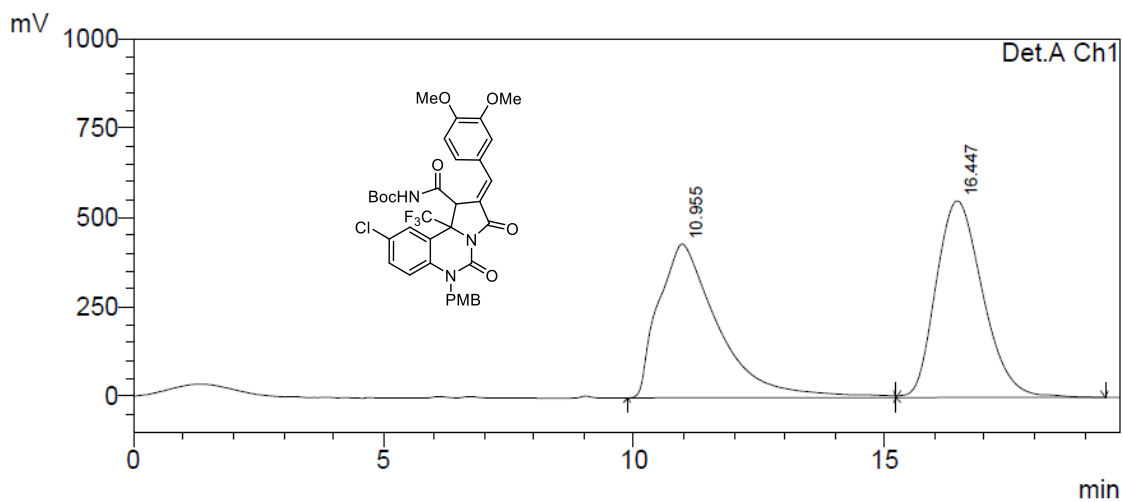

PeakTable

Detector A Ch1 254nm

| Peak# | Ret. Time | Area     | Height | Area %  |
|-------|-----------|----------|--------|---------|
| 1     | 10.955    | 35753396 | 429922 | 50.122  |
| 2     | 16.447    | 35579311 | 549598 | 49.878  |
| Total |           | 71332707 |        | 100.000 |

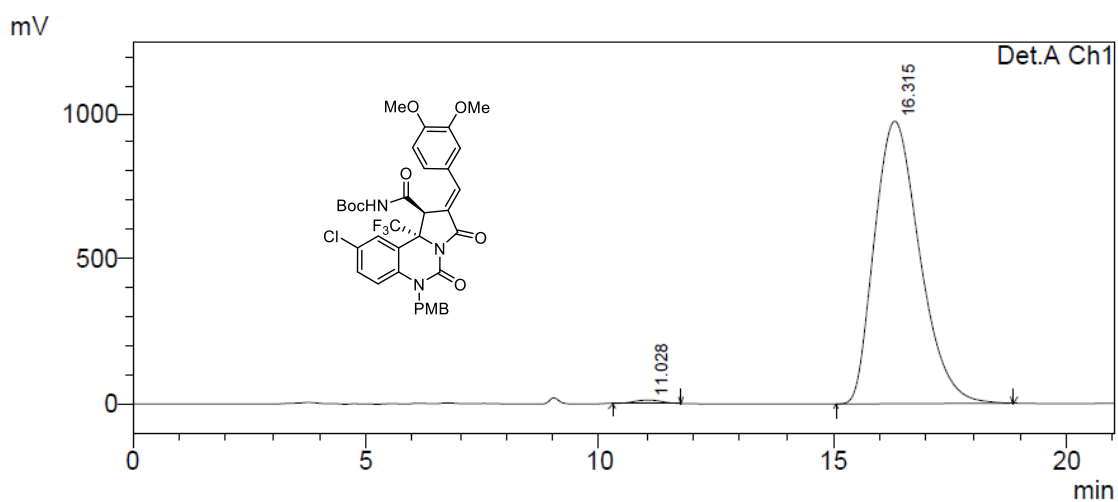

PeakTable

Detector A Ch1 254nm

| Peak# | Ret. Time | Area     | Height | Area %  |
|-------|-----------|----------|--------|---------|
| 1     | 11.028    | 468367   | 11272  | 0.708   |
| 2     | 16.315    | 65663297 | 973900 | 99.292  |
| Total |           | 66131664 |        | 100.000 |

<sup>1</sup>H and <sup>13</sup>C NMR of 3na

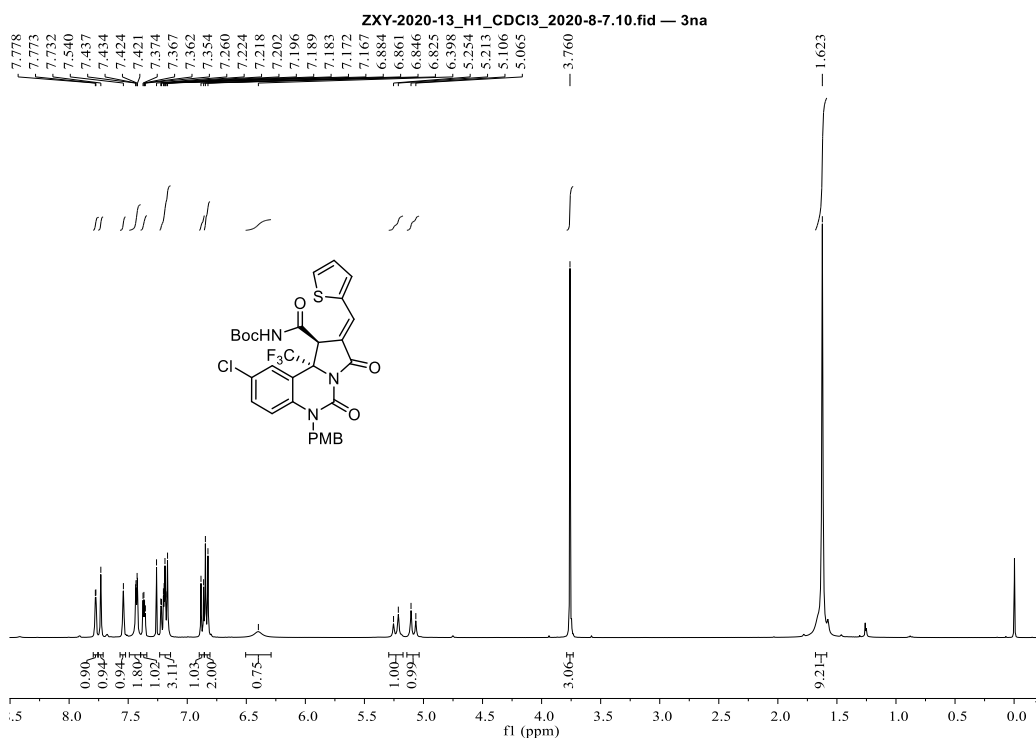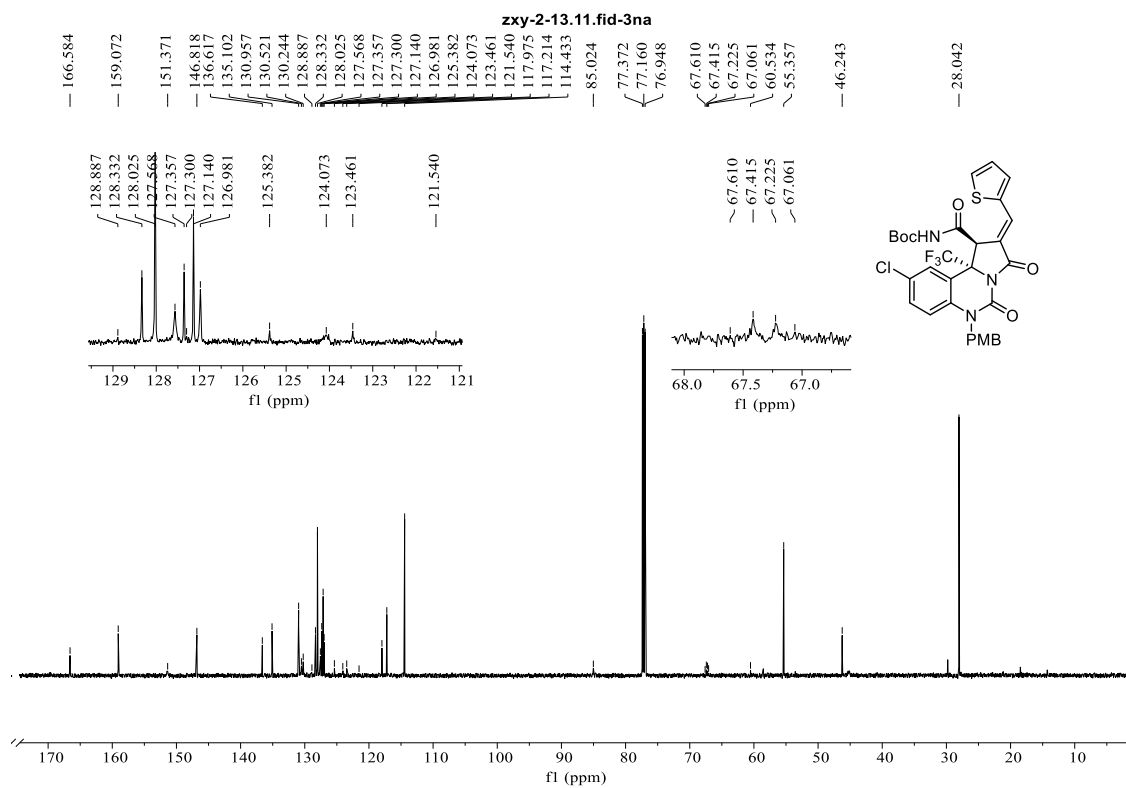

### HPLC of 3na

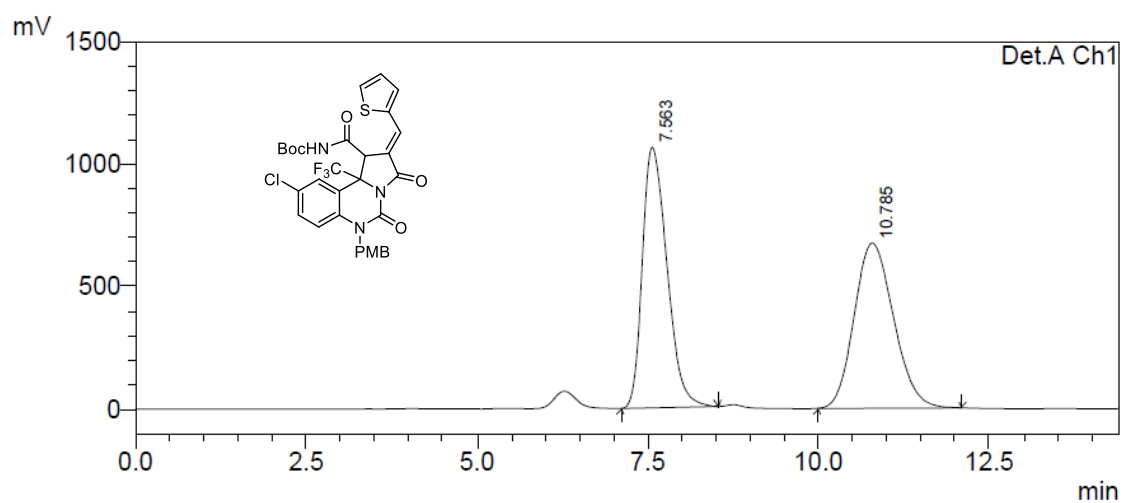

PeakTable

Detector A Ch1 254nm

| Peak# | Ret. Time | Area     | Height  | Area %  |
|-------|-----------|----------|---------|---------|
| 1     | 7.563     | 26625548 | 1063108 | 49.629  |
| 2     | 10.785    | 27023835 | 673502  | 50.371  |
| Total |           | 53649383 |         | 100.000 |

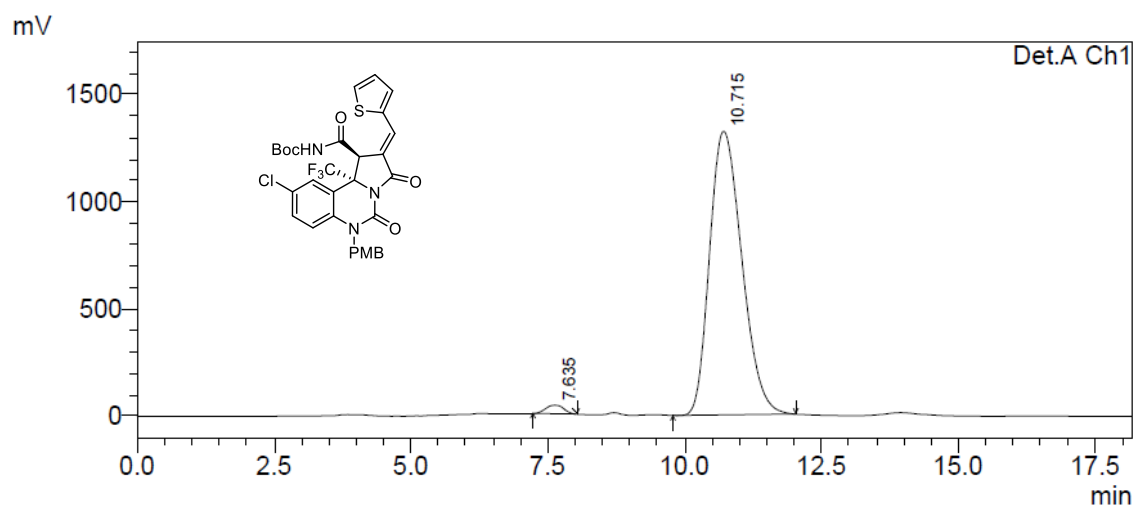

PeakTable

Detector A Ch1 254nm

| Peak# | Ret. Time | Area     | Height  | Area %  |
|-------|-----------|----------|---------|---------|
| 1     | 7.635     | 924331   | 39757   | 1.673   |
| 2     | 10.715    | 54324546 | 1323635 | 98.327  |
| Total |           | 55248877 |         | 100.000 |



# <sup>1</sup>H and <sup>13</sup>C NMR of 30a

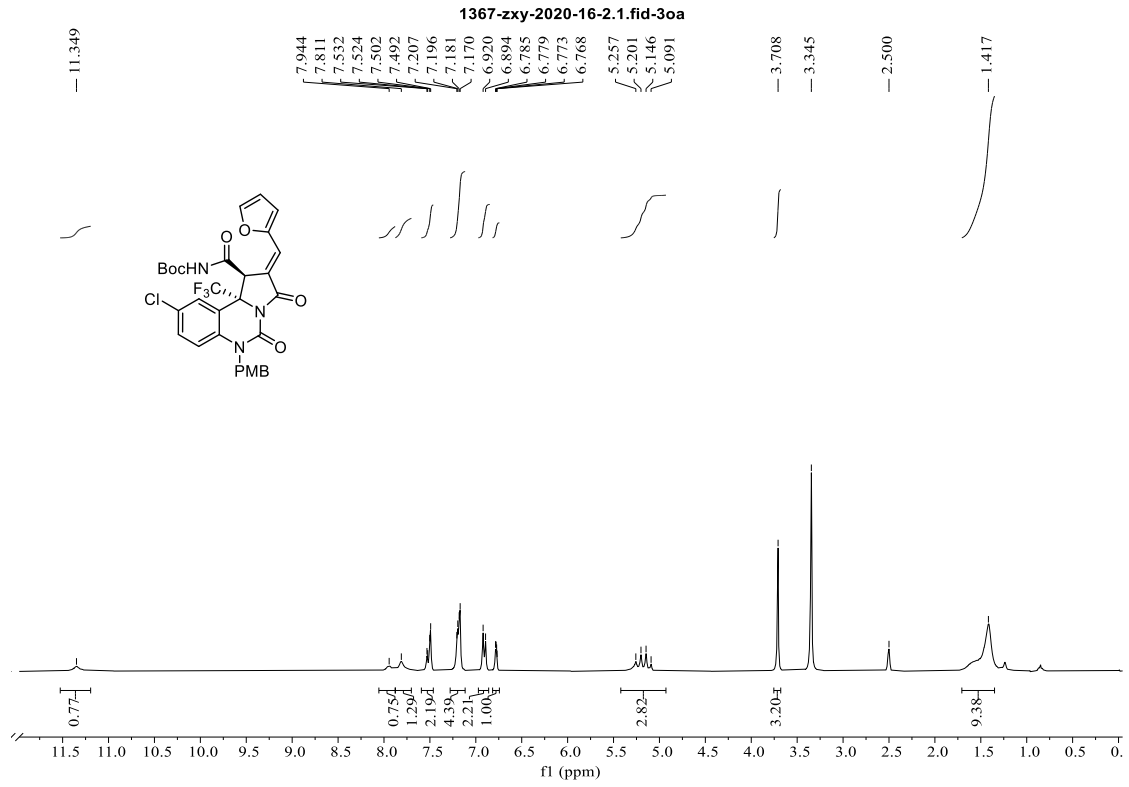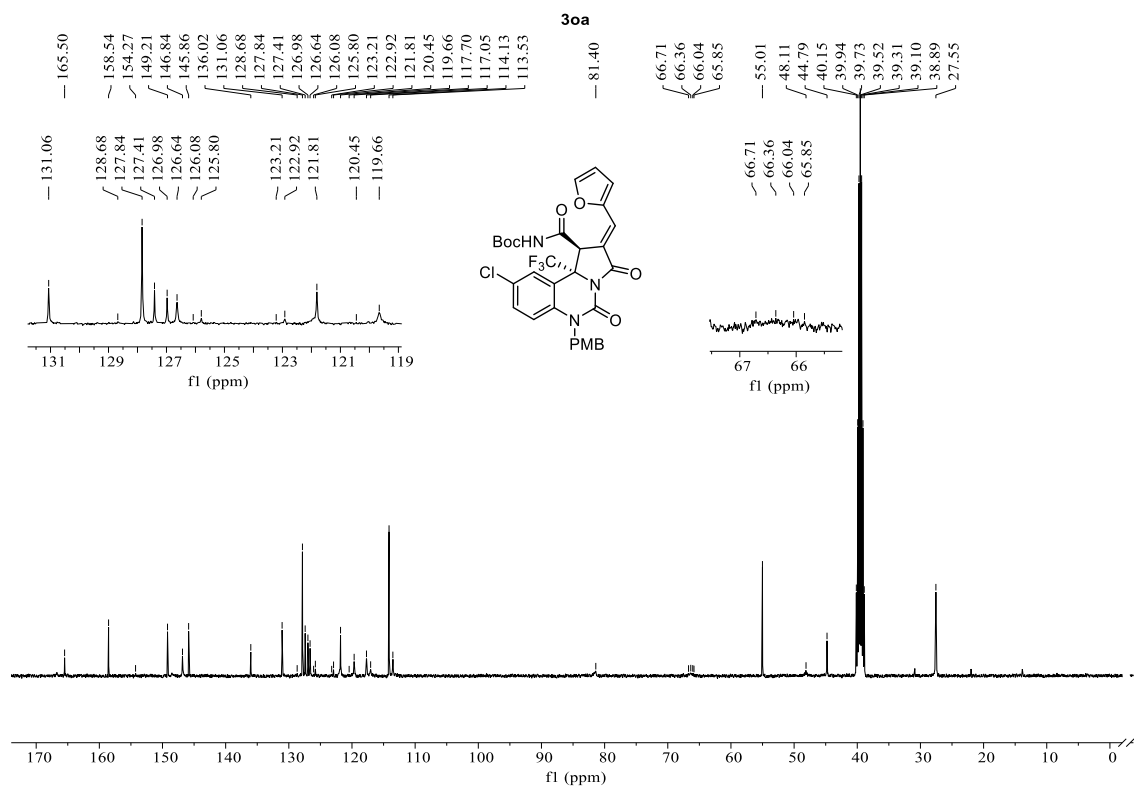

### HPLC of 30a

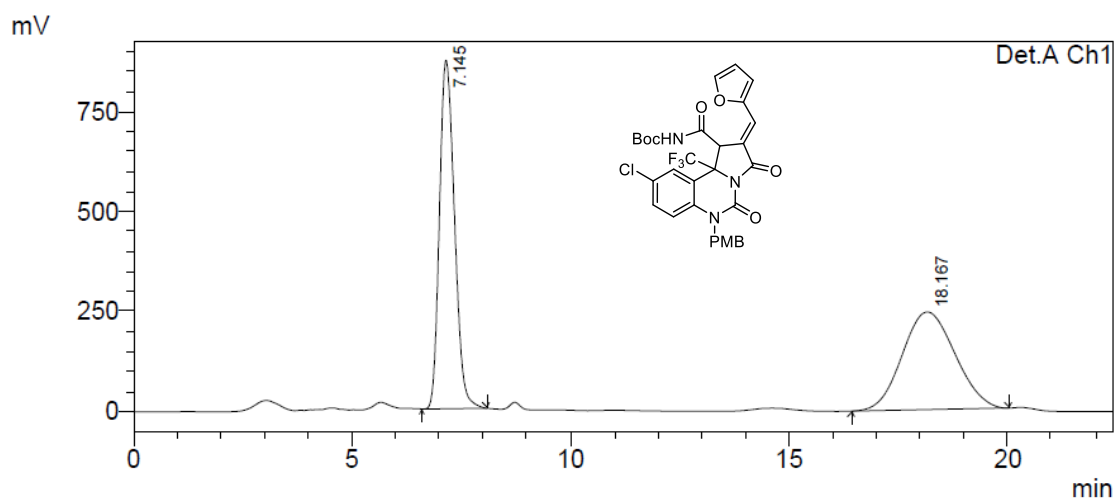

PeakTable

Detector A Ch1 254nm

| Peak# | Ret. Time | Area     | Height | Area %  |
|-------|-----------|----------|--------|---------|
| 1     | 7.145     | 20841097 | 870152 | 50.463  |
| 2     | 18.167    | 20458464 | 243662 | 49.537  |
| Total |           | 41299561 |        | 100.000 |

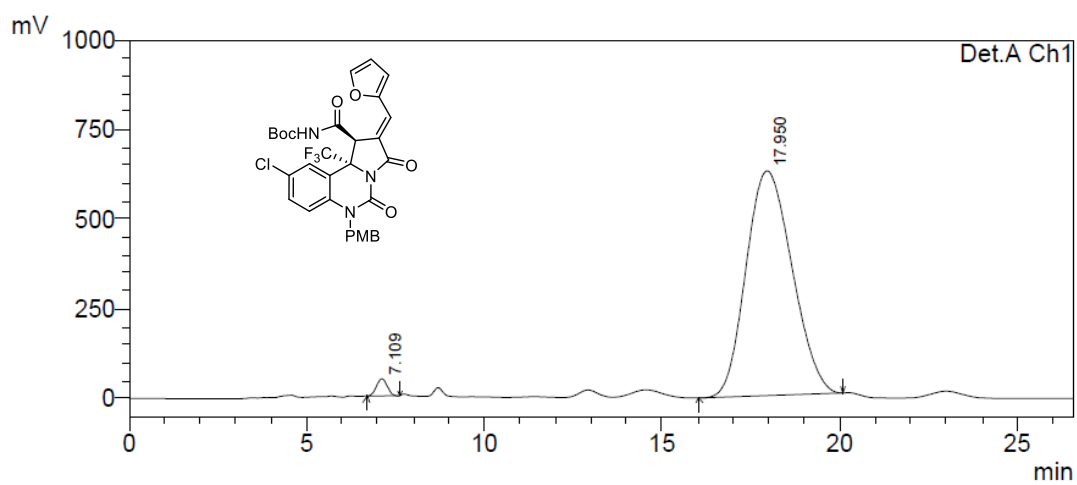

PeakTable

Detector A Ch1 254nm

| Peak# | Ret. Time | Area     | Height | Area %  |
|-------|-----------|----------|--------|---------|
| 1     | 7.109     | 987435   | 47524  | 1.720   |
| 2     | 17.950    | 56408565 | 626373 | 98.280  |
| Total |           | 57396000 |        | 100.000 |

<sup>1</sup>H and <sup>13</sup>C NMR of 3pa

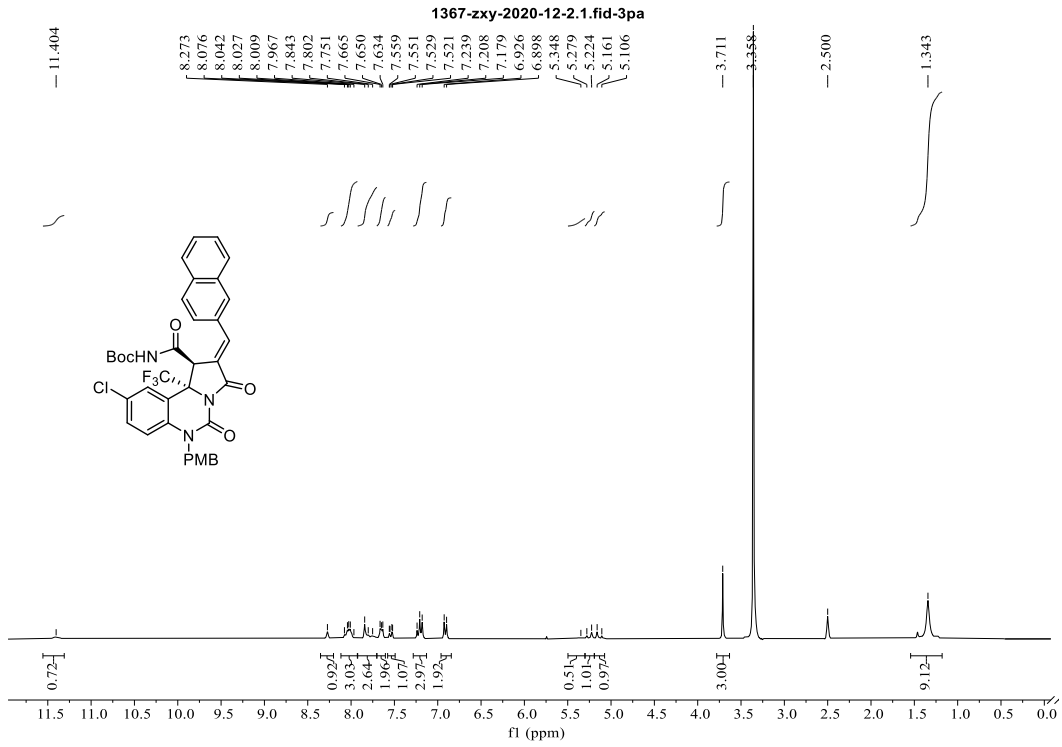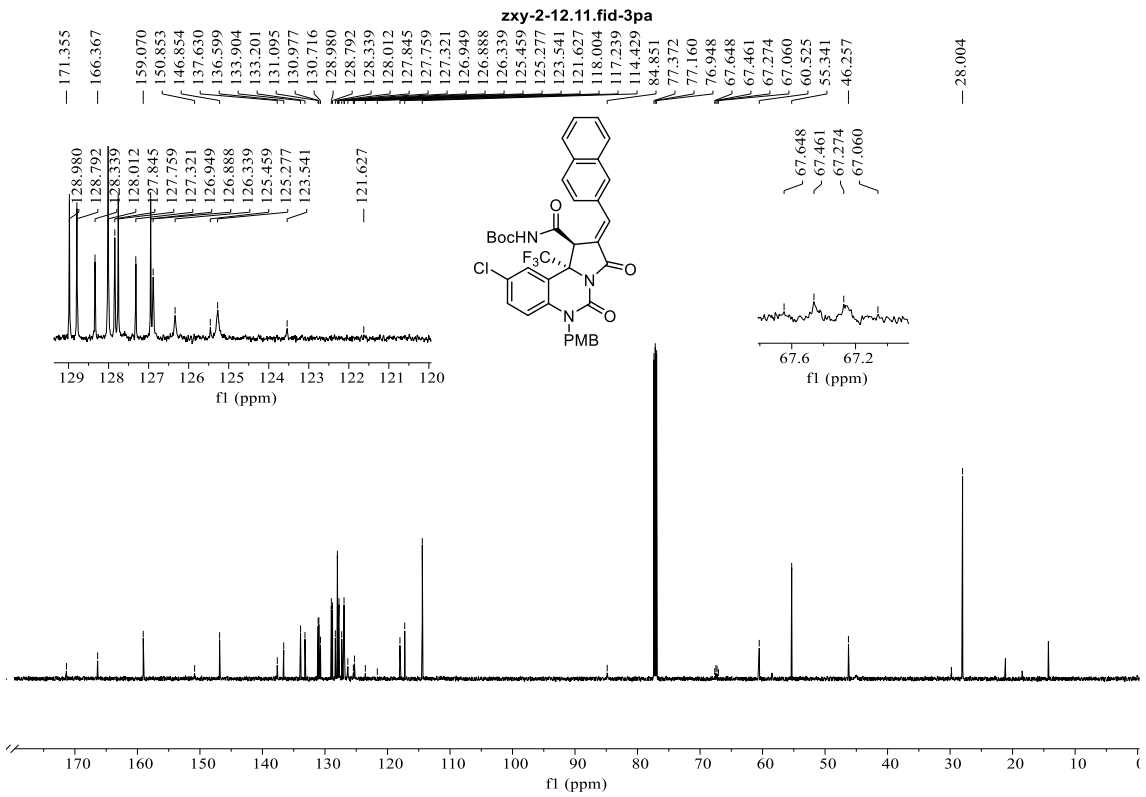

### HPLC of 3pa

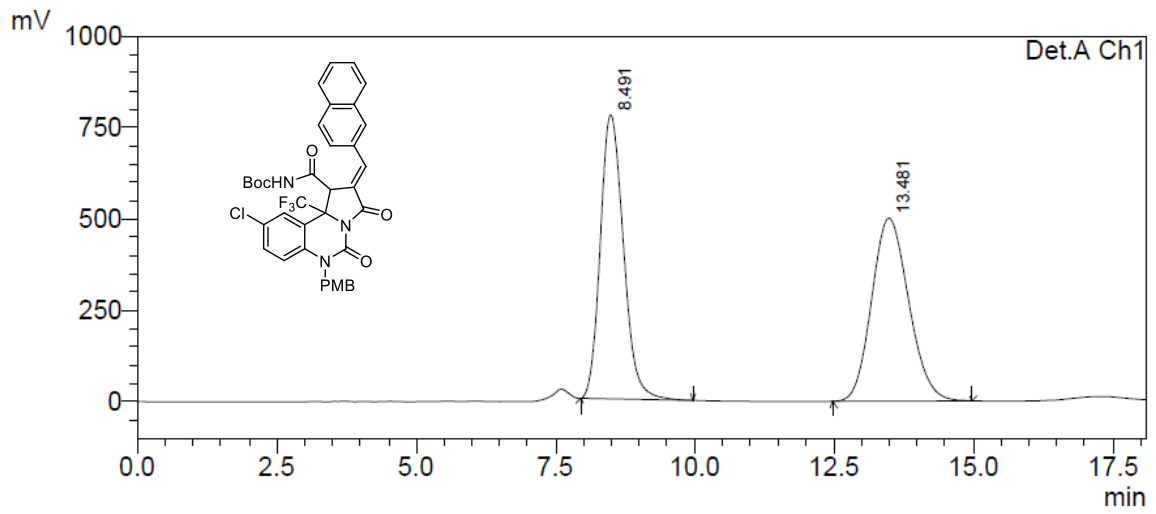

1 Det.A Ch1/254nm

PeakTable

Detector A Ch1 254nm

| Peak# | Ret. Time | Area     | Height | Area %  |
|-------|-----------|----------|--------|---------|
| 1     | 8.491     | 22485736 | 776642 | 49.300  |
| 2     | 13.481    | 23124533 | 500141 | 50.700  |
| Total |           | 45610269 |        | 100.000 |

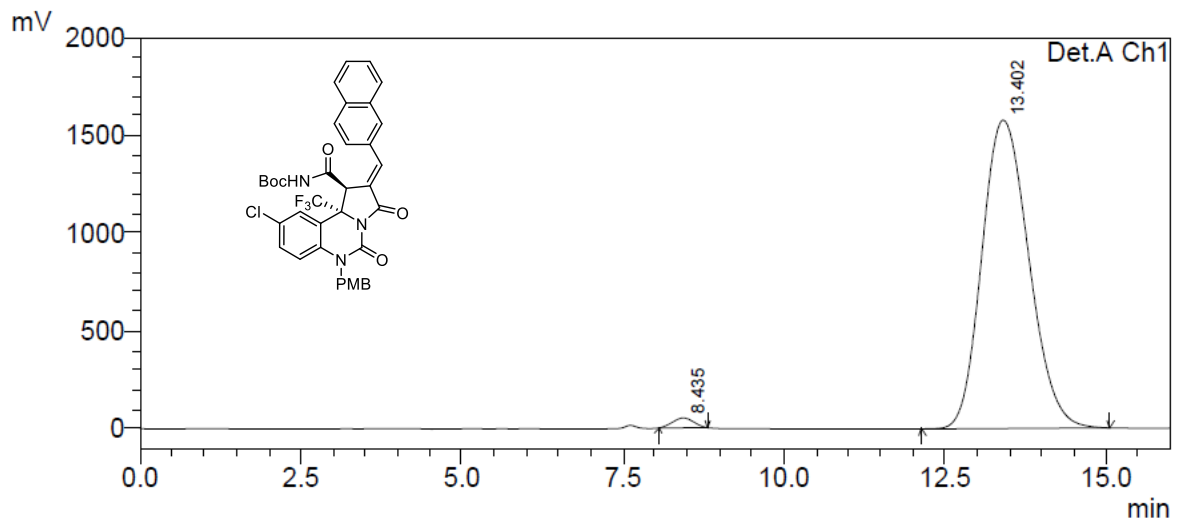

1 Det.A Ch1/254nm

PeakTable

Detector A Ch1 254nm

| Peak# | Ret. Time | Area     | Height  | Area %  |
|-------|-----------|----------|---------|---------|
| 1     | 8.435     | 1149537  | 49850   | 1.416   |
| 2     | 13.402    | 80034383 | 1575236 | 98.584  |
| Total |           | 81183920 |         | 100.000 |

<sup>1</sup>H and <sup>13</sup>C NMR of 3qa

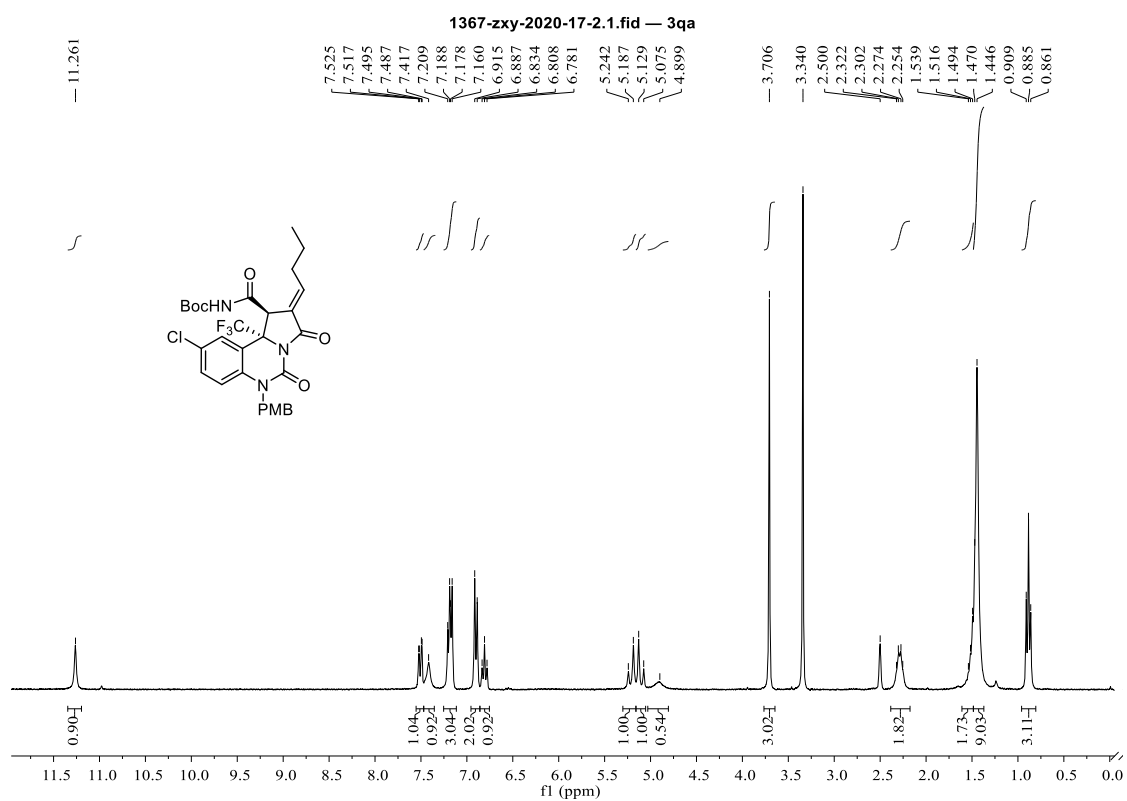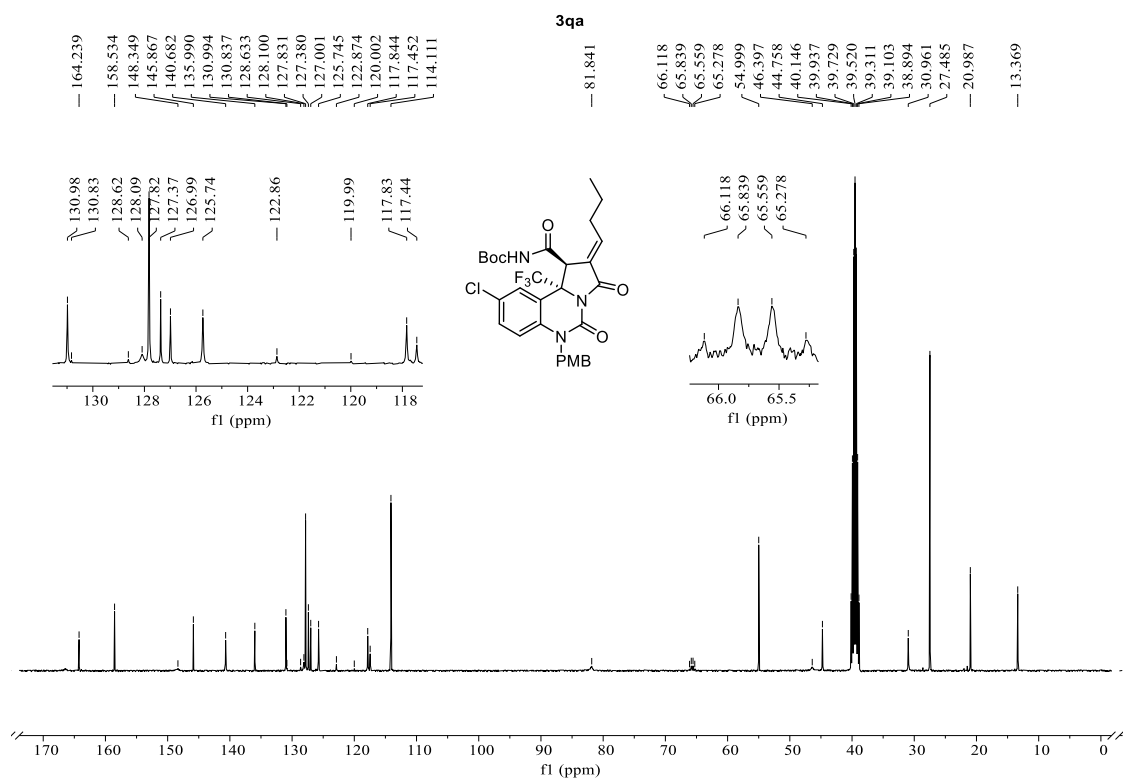

### HPLC of 3qa

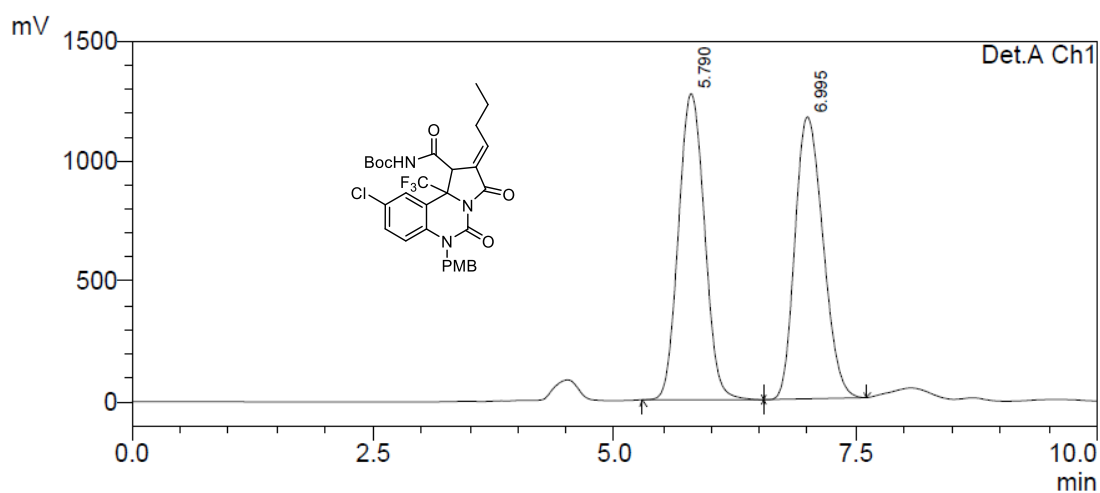

PeakTable

Detector A Ch1 254nm

| Peak# | Ret. Time | Area     | Height  | Area %  |
|-------|-----------|----------|---------|---------|
| 1     | 5.790     | 23929126 | 1272271 | 50.175  |
| 2     | 6.995     | 23762245 | 1171535 | 49.825  |
| Total |           | 47691371 |         | 100.000 |

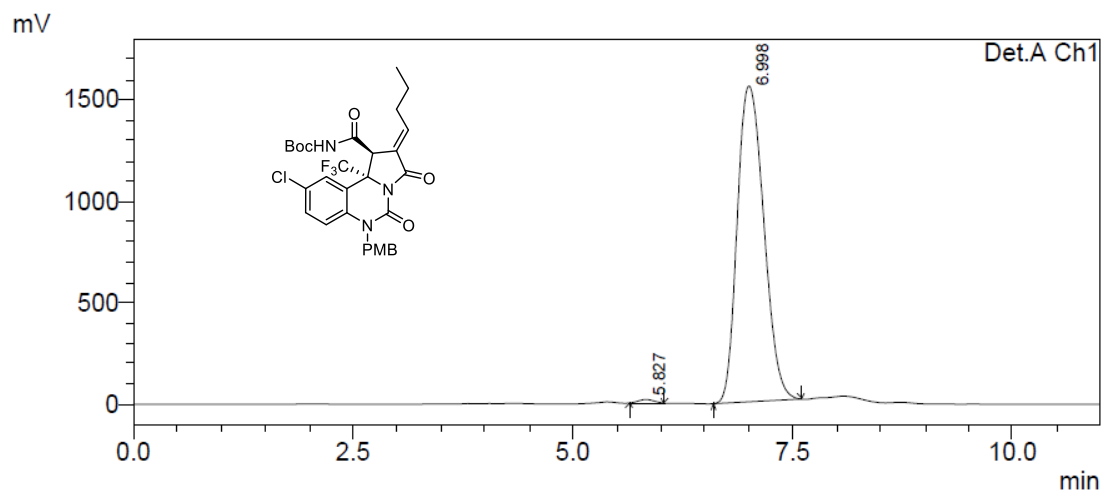

PeakTable

Detector A Ch1 254nm

| Peak# | Ret. Time | Area     | Height  | Area %  |
|-------|-----------|----------|---------|---------|
| 1     | 5.827     | 218947   | 17516   | 0.665   |
| 2     | 6.998     | 32729147 | 1555212 | 99.335  |
| Total |           | 32948094 |         | 100.000 |

<sup>1</sup>H and <sup>13</sup>C NMR of **3ra**

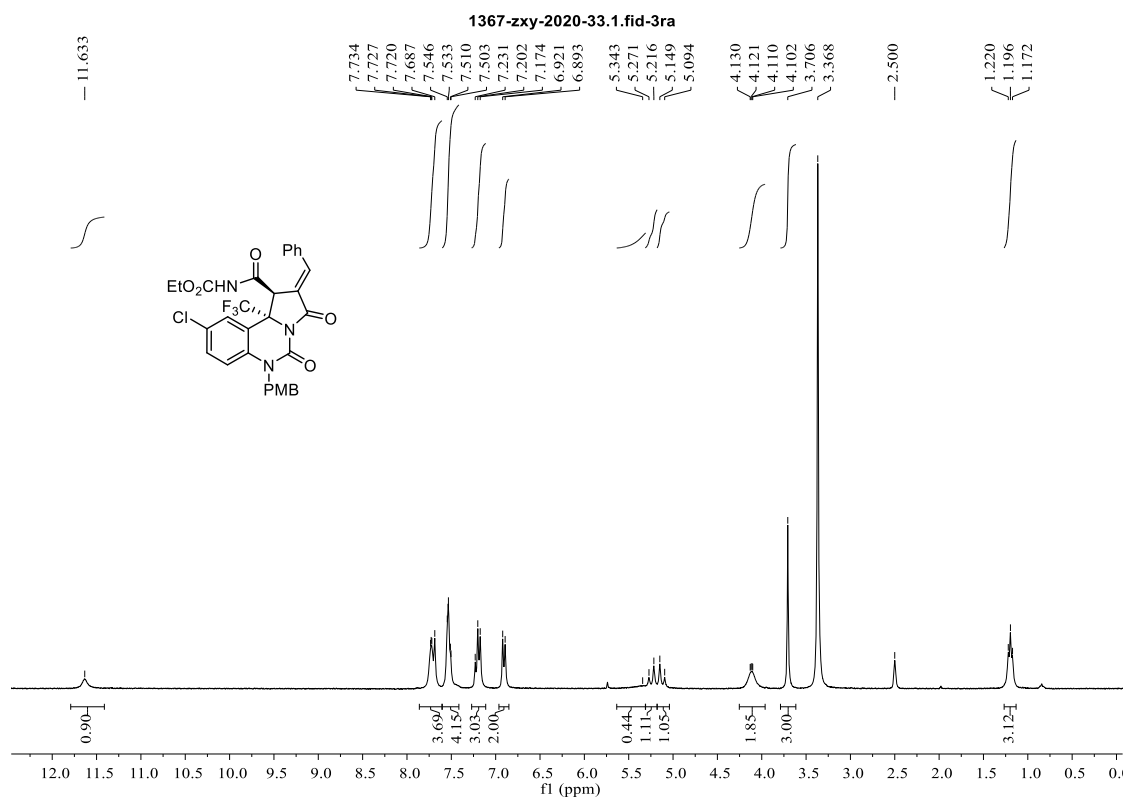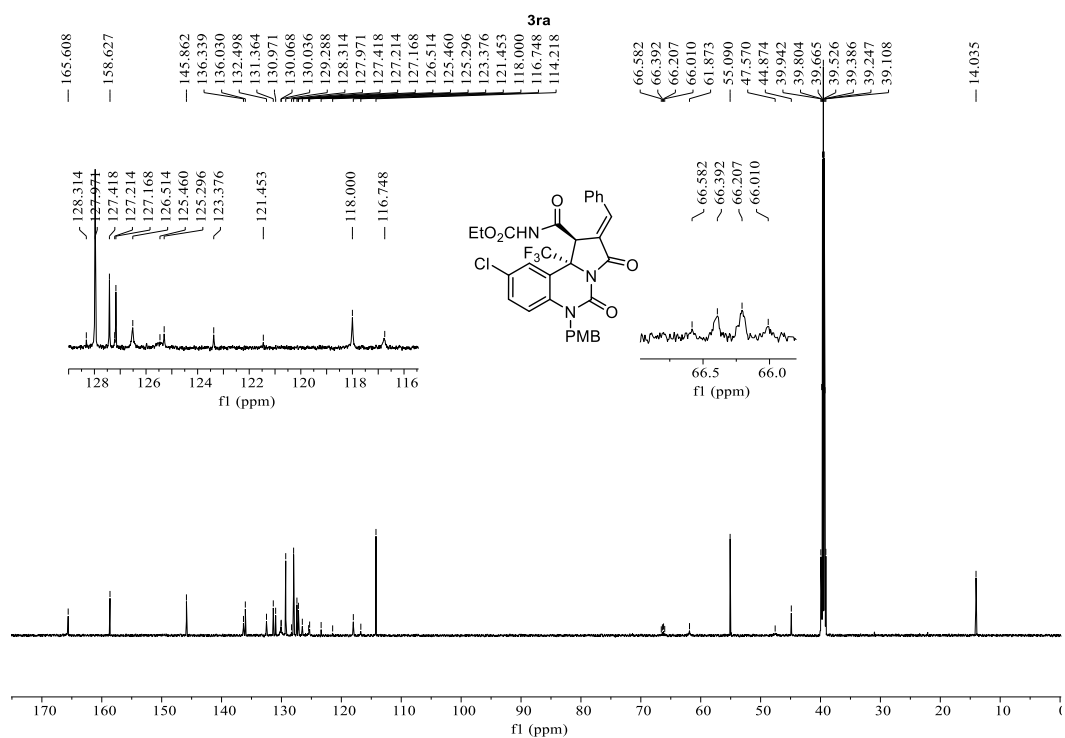

### HPLC of 3ra

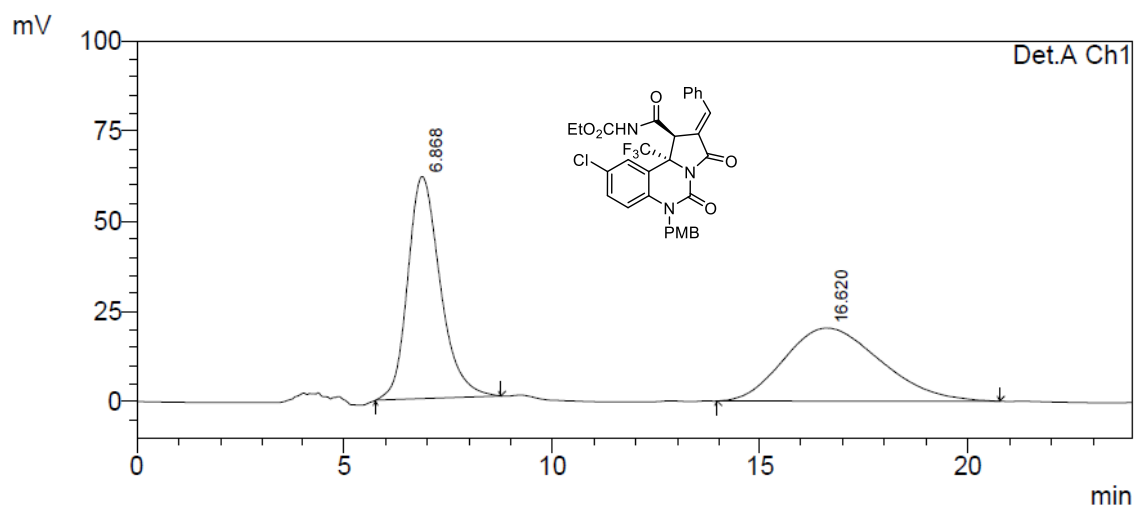

PeakTable

Detector A Ch1 254nm

| Peak# | Ret. Time | Area    | Height | Area %  |
|-------|-----------|---------|--------|---------|
| 1     | 6.868     | 3353537 | 61507  | 50.553  |
| 2     | 16.620    | 3280189 | 20283  | 49.447  |
| Total |           | 6633727 |        | 100.000 |

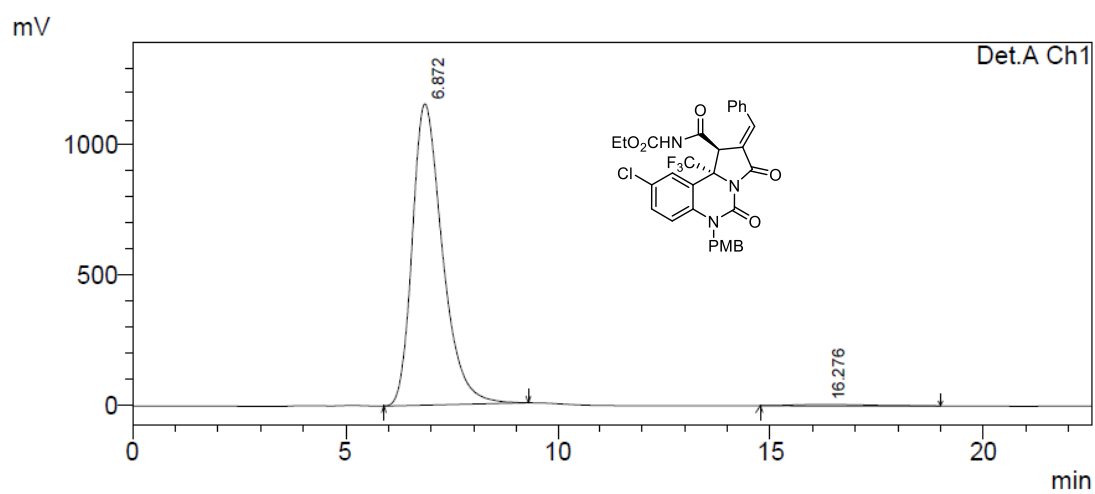

PeakTable

Detector A Ch1 254nm

| Peak# | Ret. Time | Area     | Height  | Area %  |
|-------|-----------|----------|---------|---------|
| 1     | 6.872     | 57169139 | 1156695 | 98.720  |
| 2     | 16.276    | 741002   | 5532    | 1.280   |
| Total |           | 57910141 |         | 100.000 |



# <sup>1</sup>H and <sup>13</sup>C NMR of 3sa

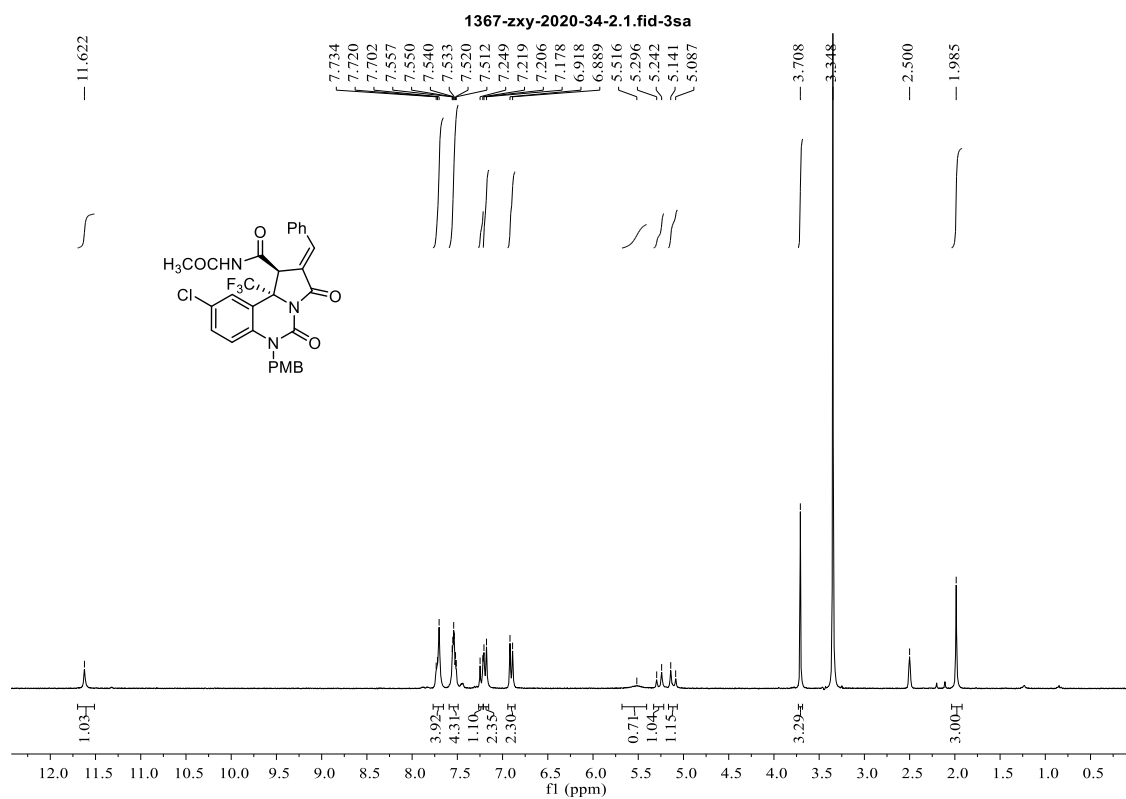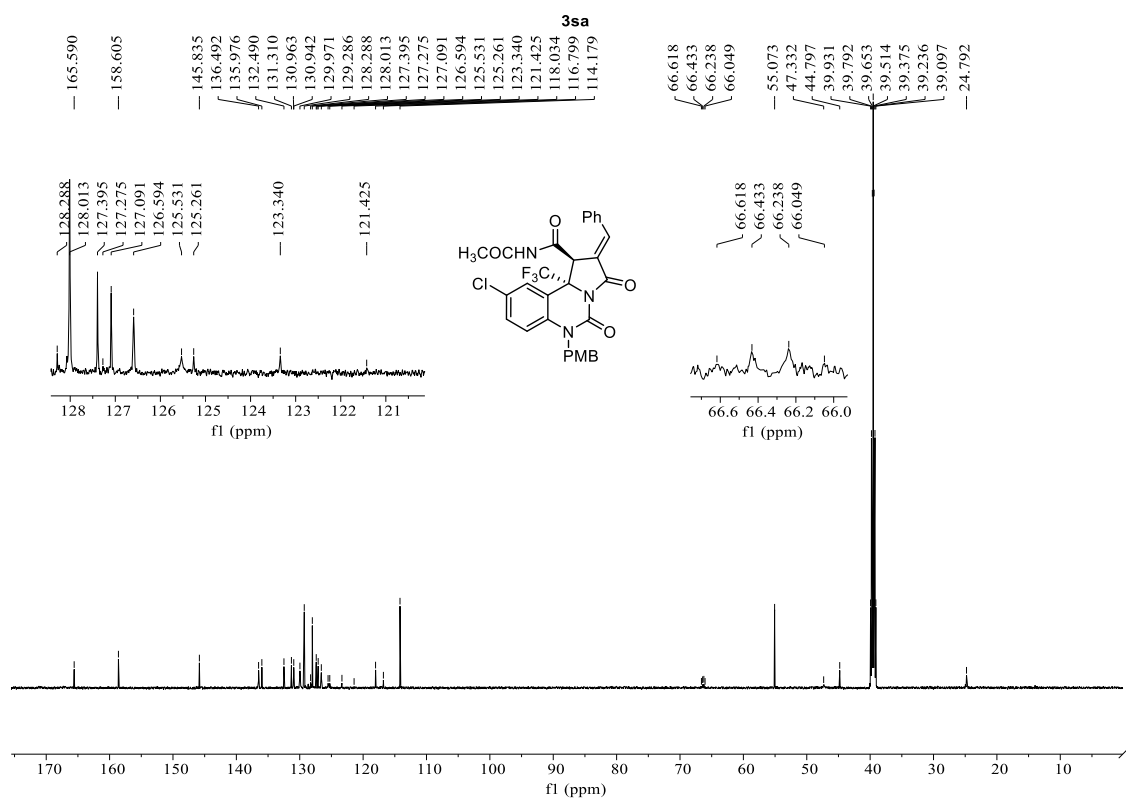

### HPLC of 3sa

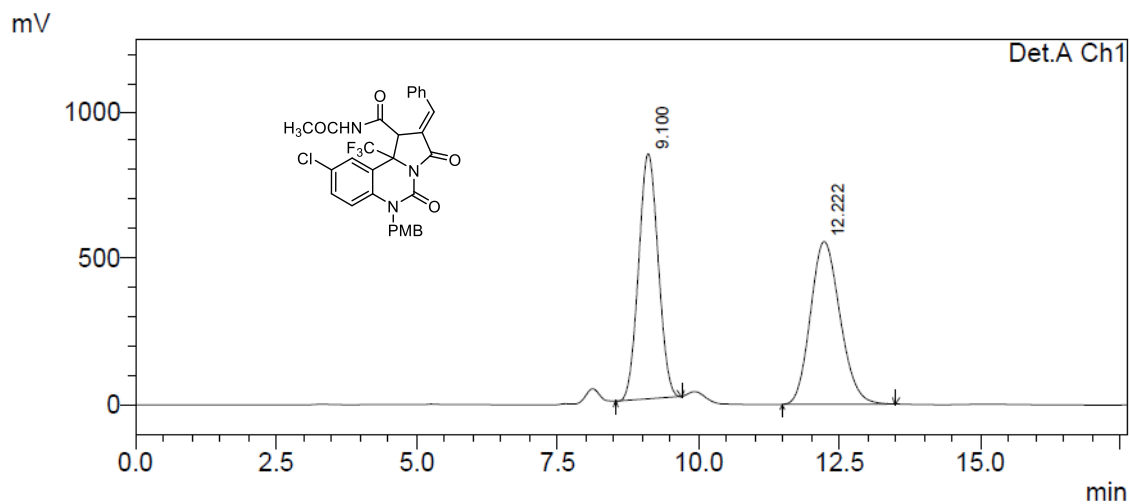

PeakTable

Detector A Ch1 254nm

| Peak# | Ret. Time | Area     | Height | Area %  |
|-------|-----------|----------|--------|---------|
| 1     | 9.100     | 20178066 | 836762 | 49.815  |
| 2     | 12.222    | 20328063 | 555841 | 50.185  |
| Total |           | 40506129 |        | 100.000 |

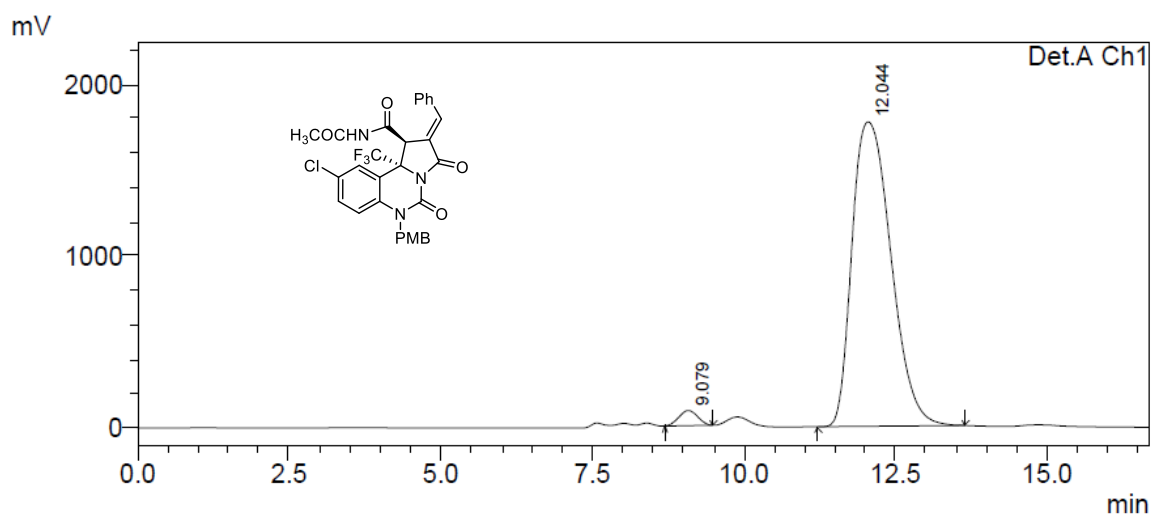

PeakTable

Detector A Ch1 254nm

| Peak# | Ret. Time | Area     | Height  | Area %  |
|-------|-----------|----------|---------|---------|
| 1     | 9.079     | 1902895  | 88057   | 2.338   |
| 2     | 12.044    | 79472862 | 1773061 | 97.662  |
| Total |           | 81375757 |         | 100.000 |

# $^1\text{H}$ and $^{13}\text{C}$ NMR of **3ab**

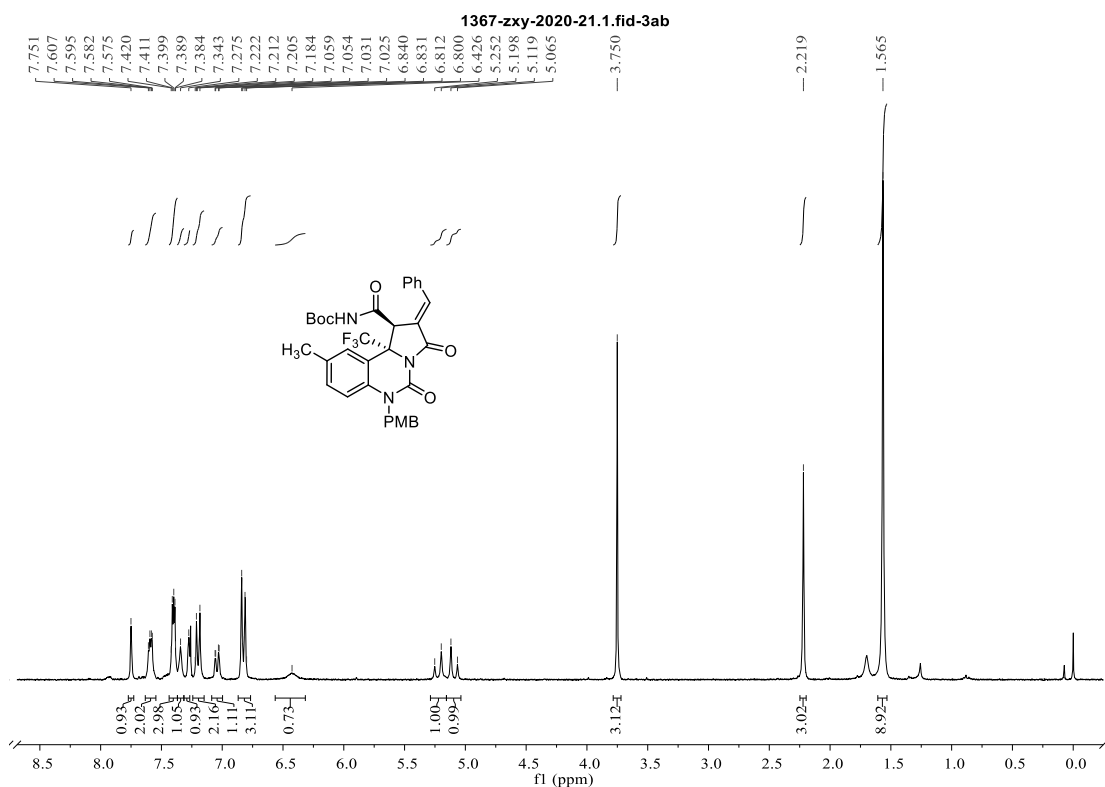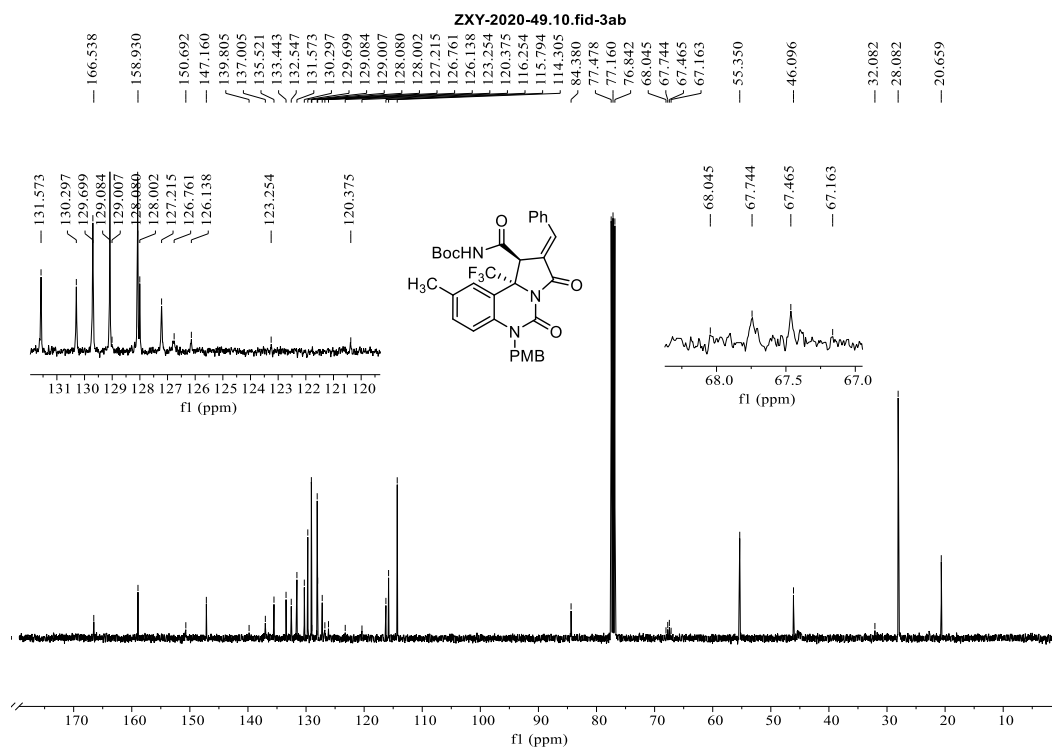

### HPLC of 3ab

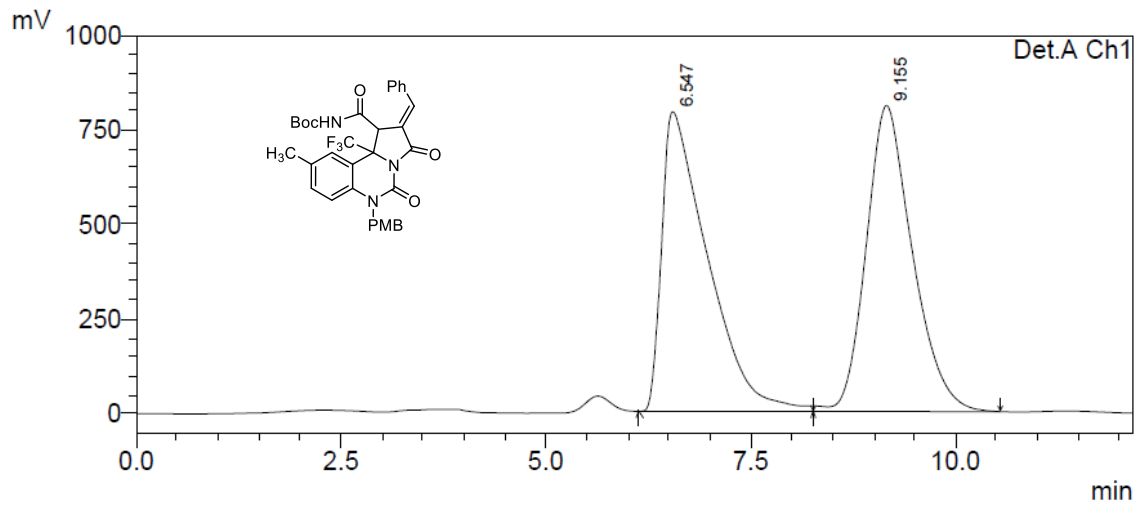

1 Det.A Ch1/254nm

PeakTable

Detector A Ch1 254nm

| Peak# | Ret. Time | Area     | Height | Area %  |
|-------|-----------|----------|--------|---------|
| 1     | 6.547     | 30854080 | 791527 | 49.244  |
| 2     | 9.155     | 31800876 | 808615 | 50.756  |
| Total |           | 62654957 |        | 100.000 |

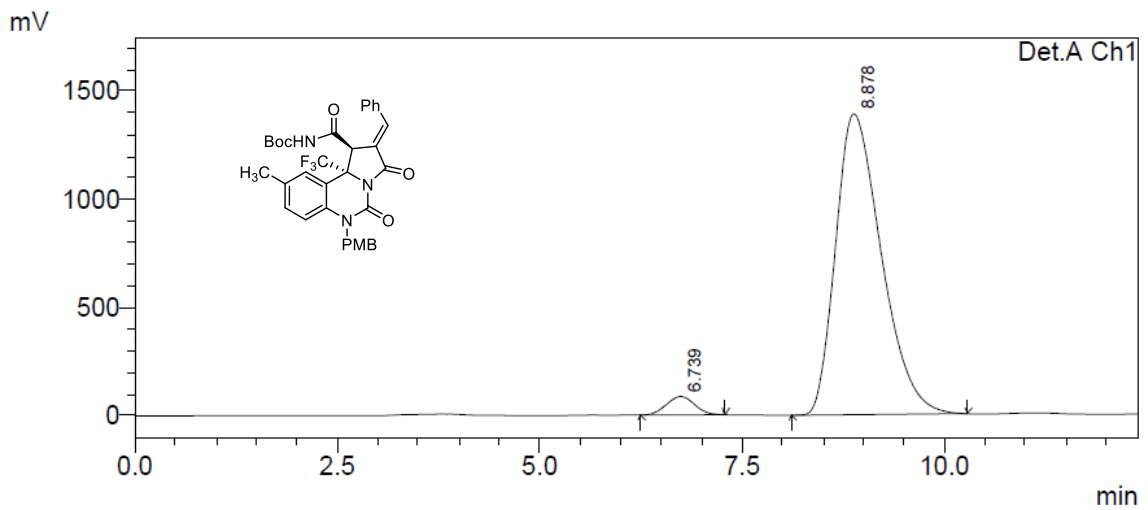

1 Det.A Ch1/254nm

PeakTable

Detector A Ch1 254nm

| Peak# | Ret. Time | Area     | Height  | Area %  |
|-------|-----------|----------|---------|---------|
| 1     | 6.739     | 2067268  | 84862   | 3.643   |
| 2     | 8.878     | 54676537 | 1390544 | 96.357  |
| Total |           | 56743805 |         | 100.000 |

# $^1\text{H}$ and $^{13}\text{C}$ NMR of **3ac**

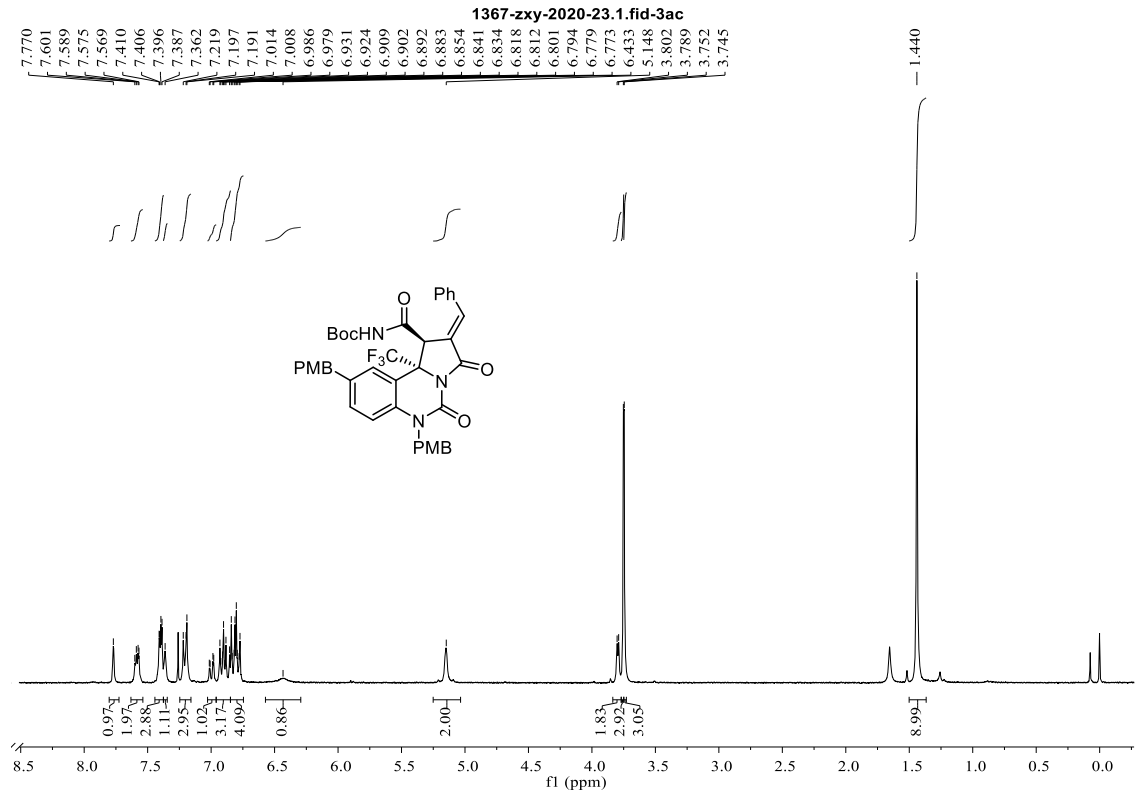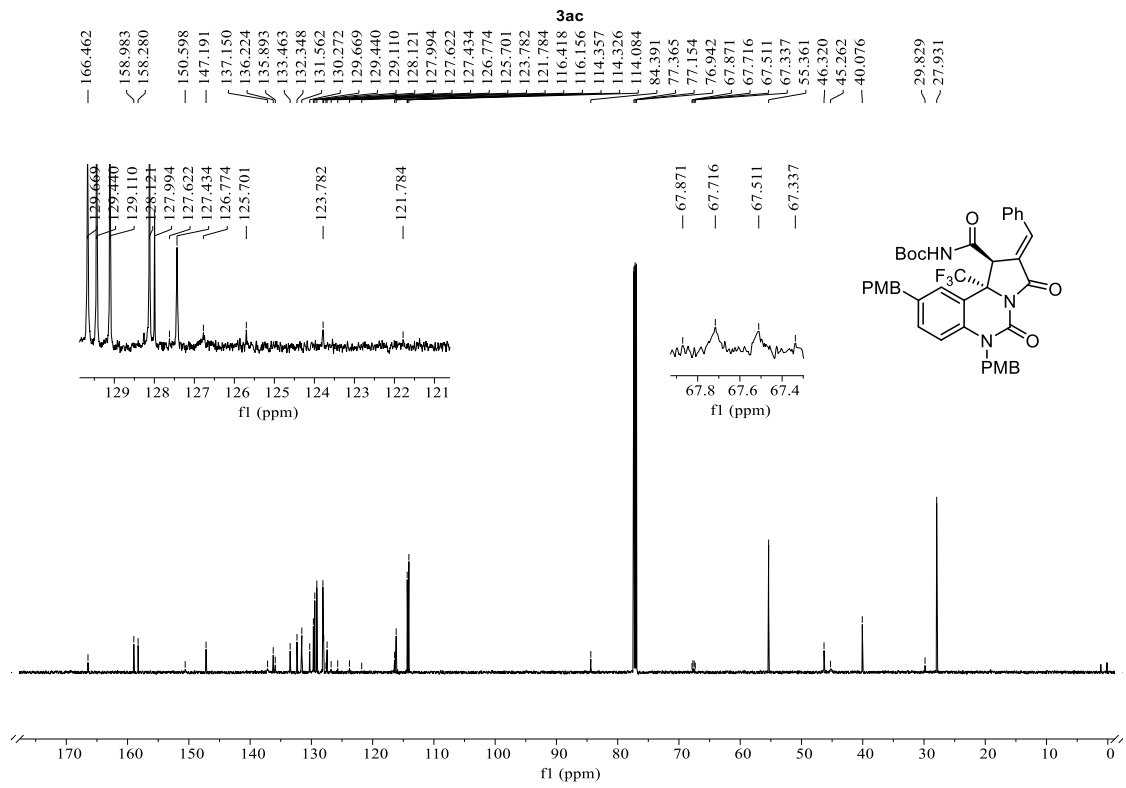

### HPLC of 3ac

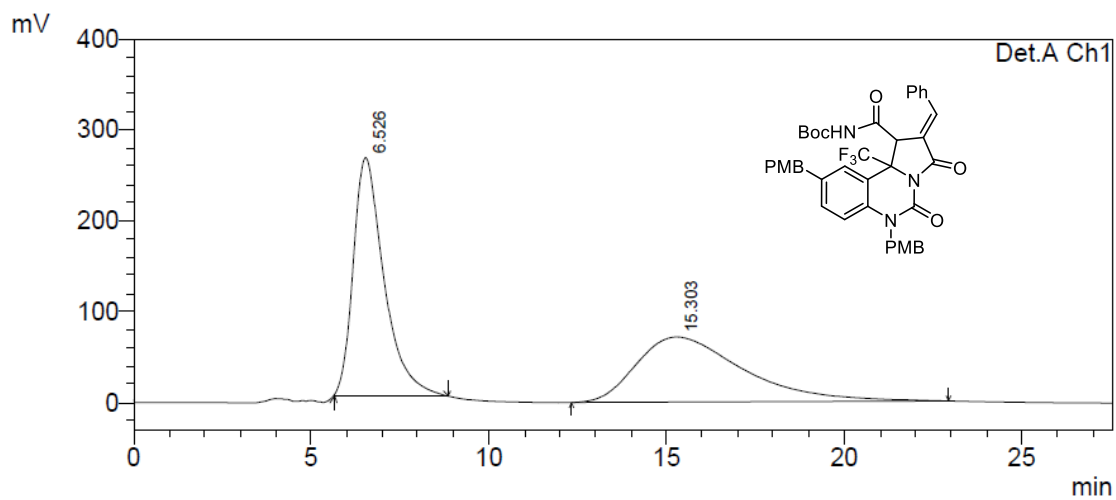

1 Det.A Ch1/254nm

PeakTable

Detector A Ch1 254nm

| Peak# | Ret. Time | Area     | Height | Area %  |
|-------|-----------|----------|--------|---------|
| 1     | 6.526     | 15785128 | 262281 | 51.323  |
| 2     | 15.303    | 14971398 | 71524  | 48.677  |
| Total |           | 30756526 |        | 100.000 |

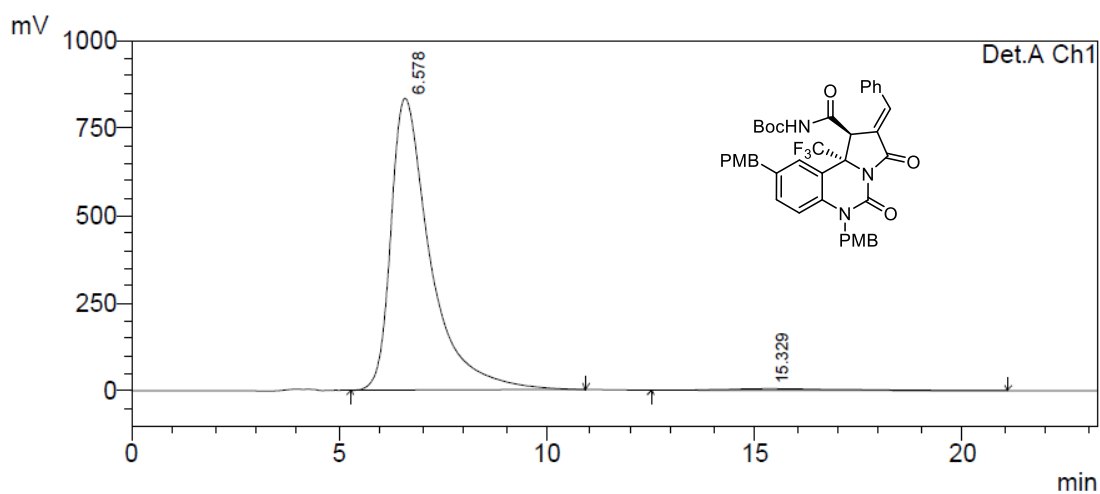

1 Det.A Ch1/254nm

PeakTable

Detector A Ch1 254nm

| Peak# | Ret. Time | Area     | Height | Area %  |
|-------|-----------|----------|--------|---------|
| 1     | 6.578     | 54961874 | 832476 | 98.256  |
| 2     | 15.329    | 975392   | 5009   | 1.744   |
| Total |           | 55937266 |        | 100.000 |

<sup>1</sup>H and <sup>13</sup>C NMR of **3ad**

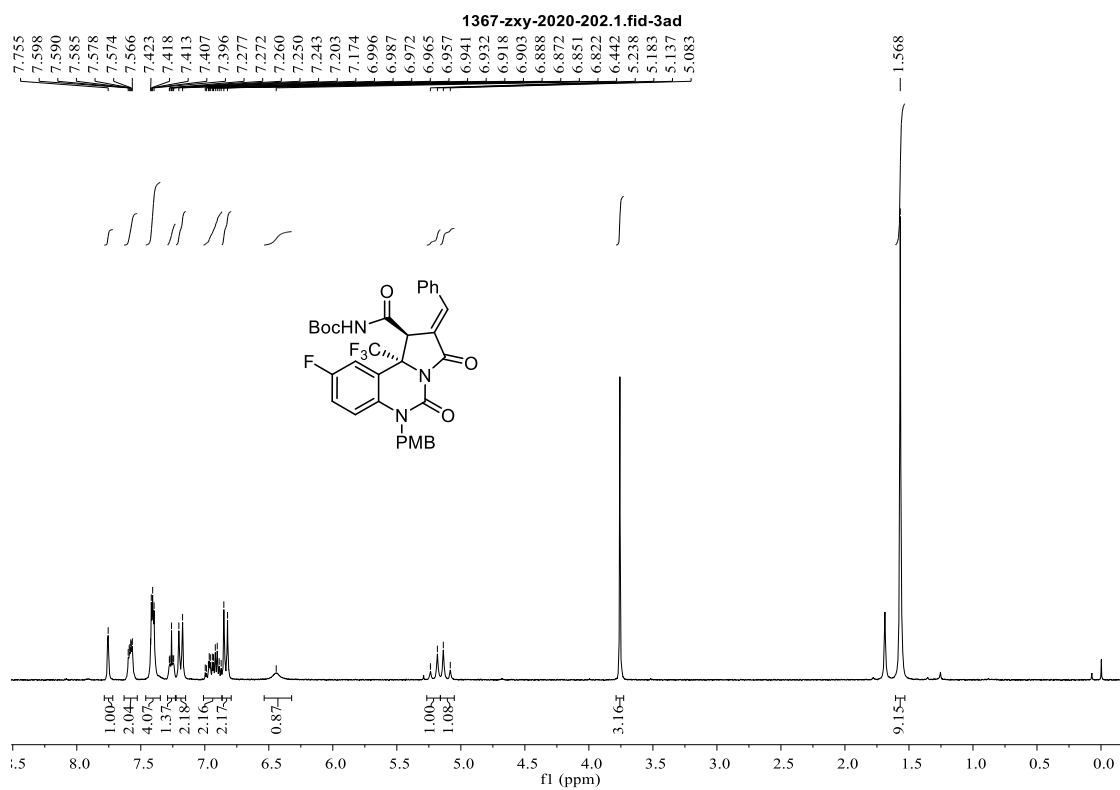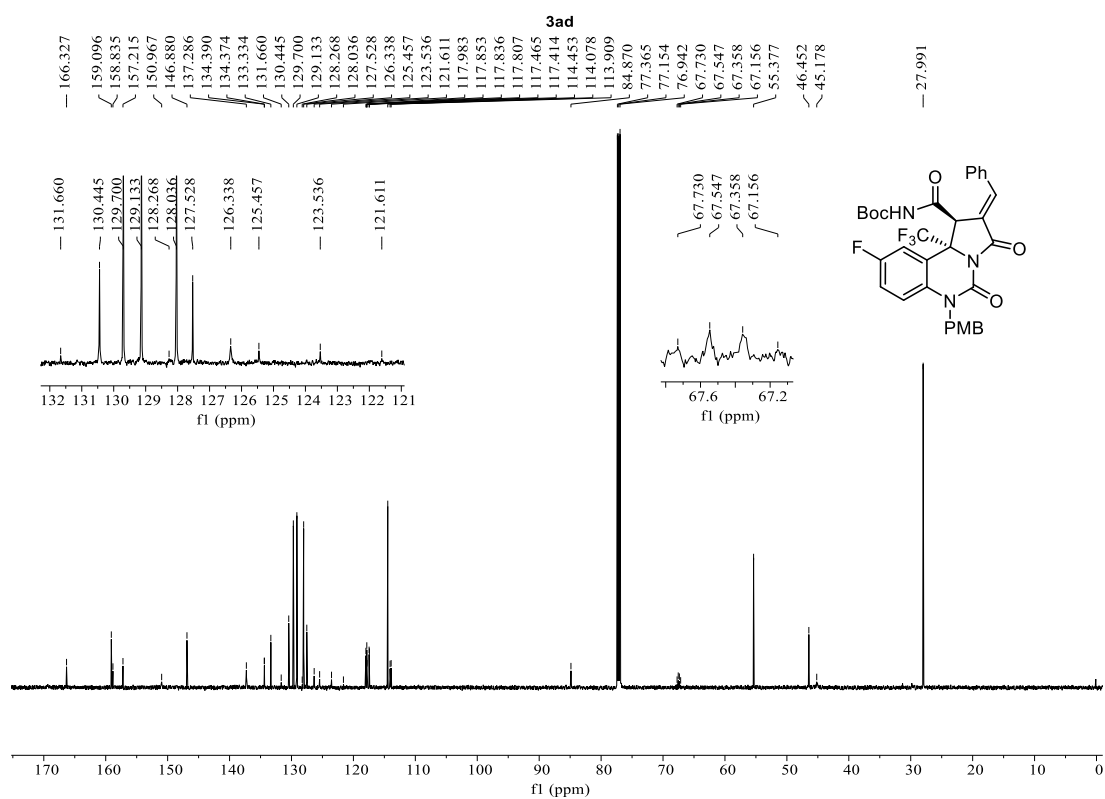

### HPLC of 3ad

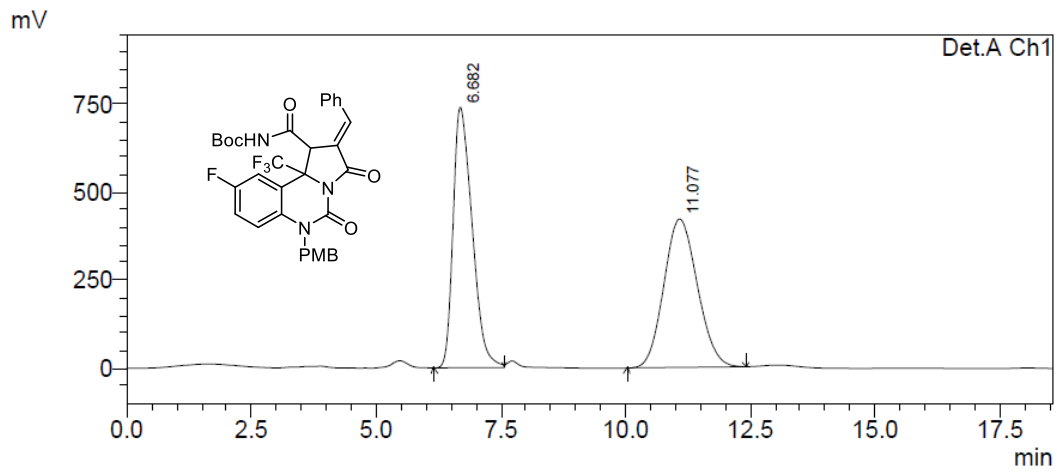

PeakTable

| Peak# | Ret. Time | Area     | Height | Area %  |
|-------|-----------|----------|--------|---------|
| 1     | 6.682     | 19678153 | 741092 | 49.954  |
| 2     | 11.077    | 19714656 | 422226 | 50.046  |
| Total |           | 39392809 |        | 100.000 |

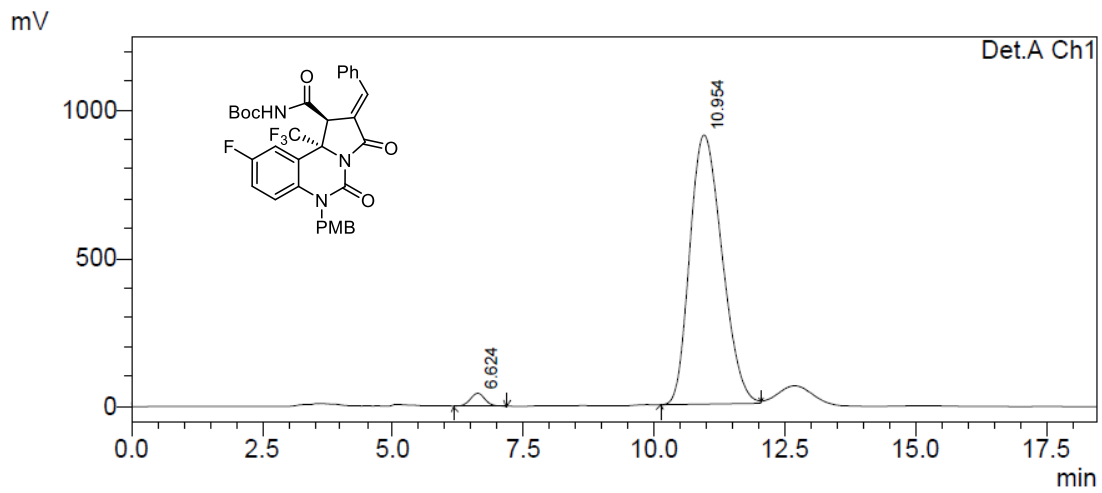

PeakTable

| Peak# | Ret. Time | Area     | Height | Area %  |
|-------|-----------|----------|--------|---------|
| 1     | 6.624     | 848205   | 43143  | 2.125   |
| 2     | 10.954    | 39067849 | 907916 | 97.875  |
| Total |           | 39916054 |        | 100.000 |



# $^1\text{H}$ and $^{13}\text{C}$ NMR of **3ae**

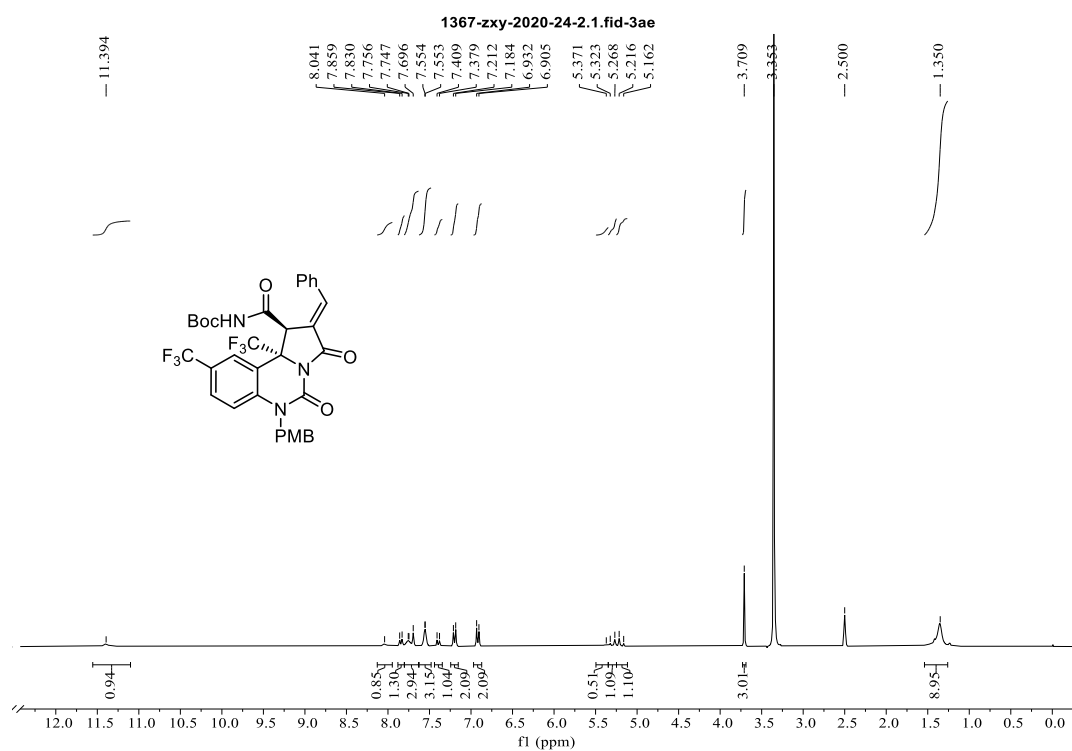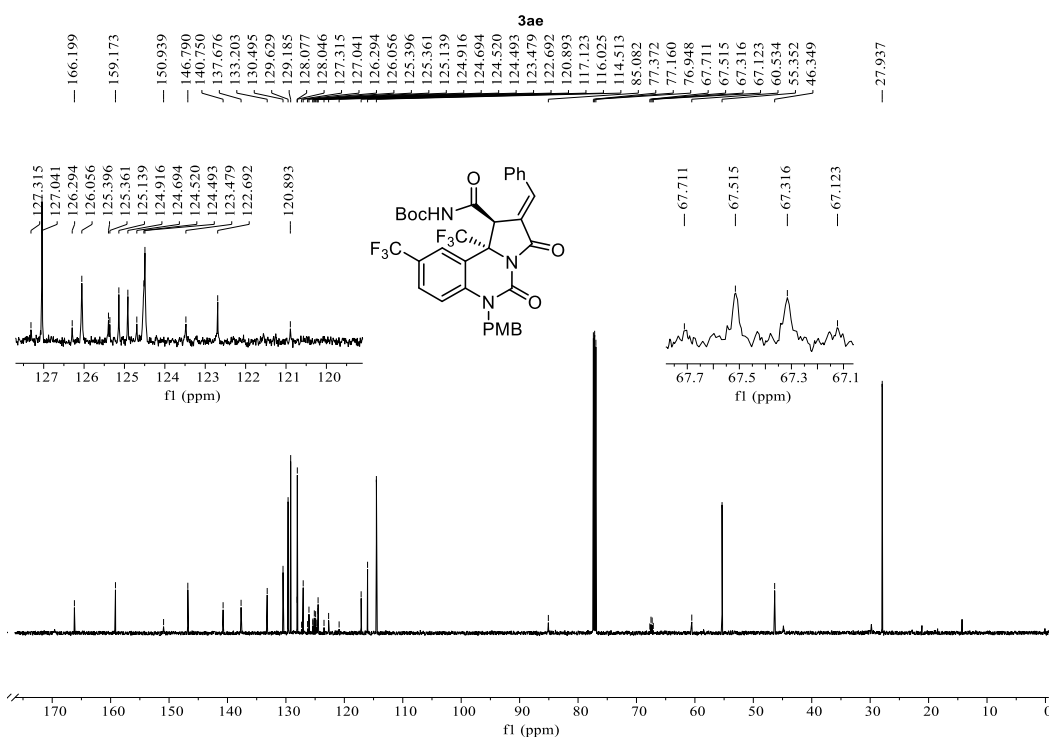

### HPLC of 3ae

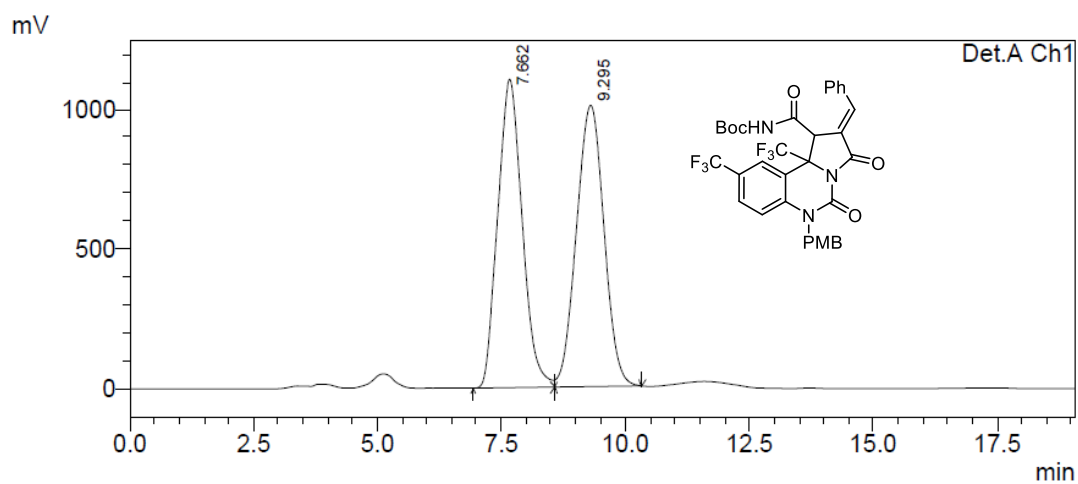

PeakTable

| Detector A Ch1 254nm |           |          |         |         |
|----------------------|-----------|----------|---------|---------|
| Peak#                | Ret. Time | Area     | Height  | Area %  |
| 1                    | 7.662     | 37892405 | 1104319 | 49.260  |
| 2                    | 9.295     | 39031382 | 1007588 | 50.740  |
| Total                |           | 76923787 |         | 100.000 |

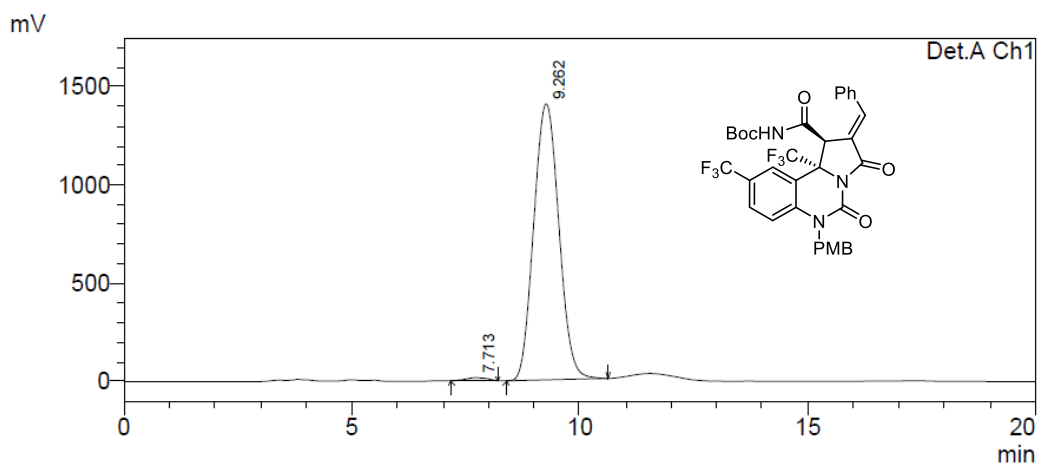

PeakTable

| Detector A Ch1 254nm |           |          |         |         |
|----------------------|-----------|----------|---------|---------|
| Peak#                | Ret. Time | Area     | Height  | Area %  |
| 1                    | 7.713     | 525761   | 15859   | 0.967   |
| 2                    | 9.262     | 53866521 | 1405649 | 99.033  |
| Total                |           | 54392282 |         | 100.000 |

# <sup>1</sup>H and <sup>13</sup>C NMR of 3af

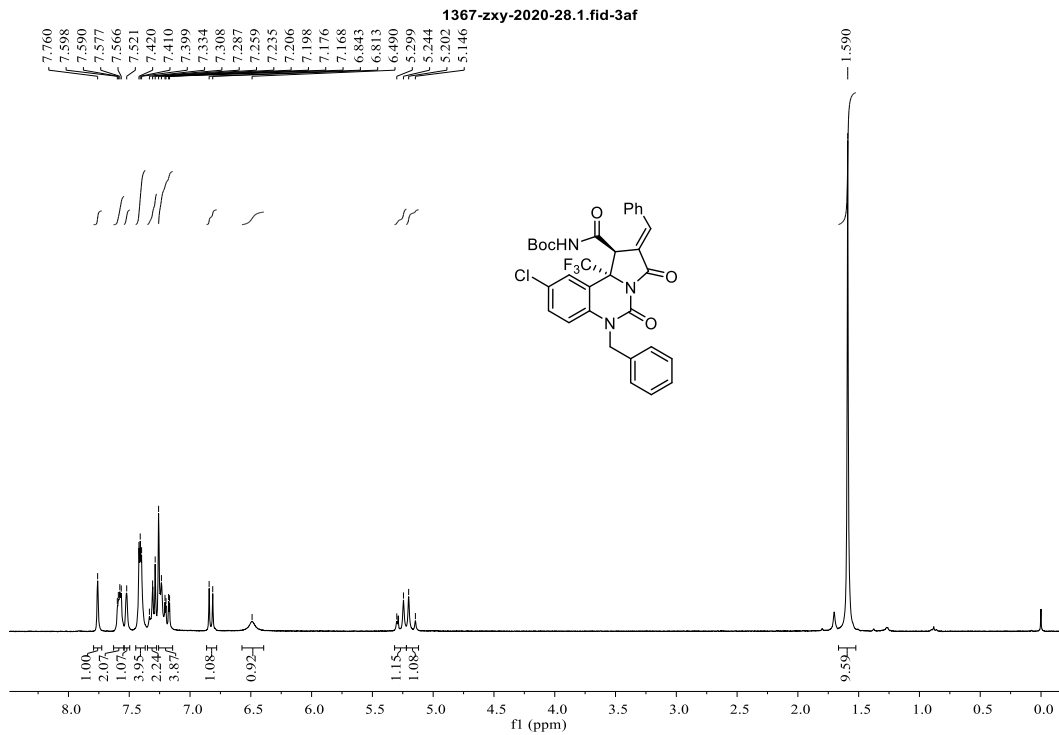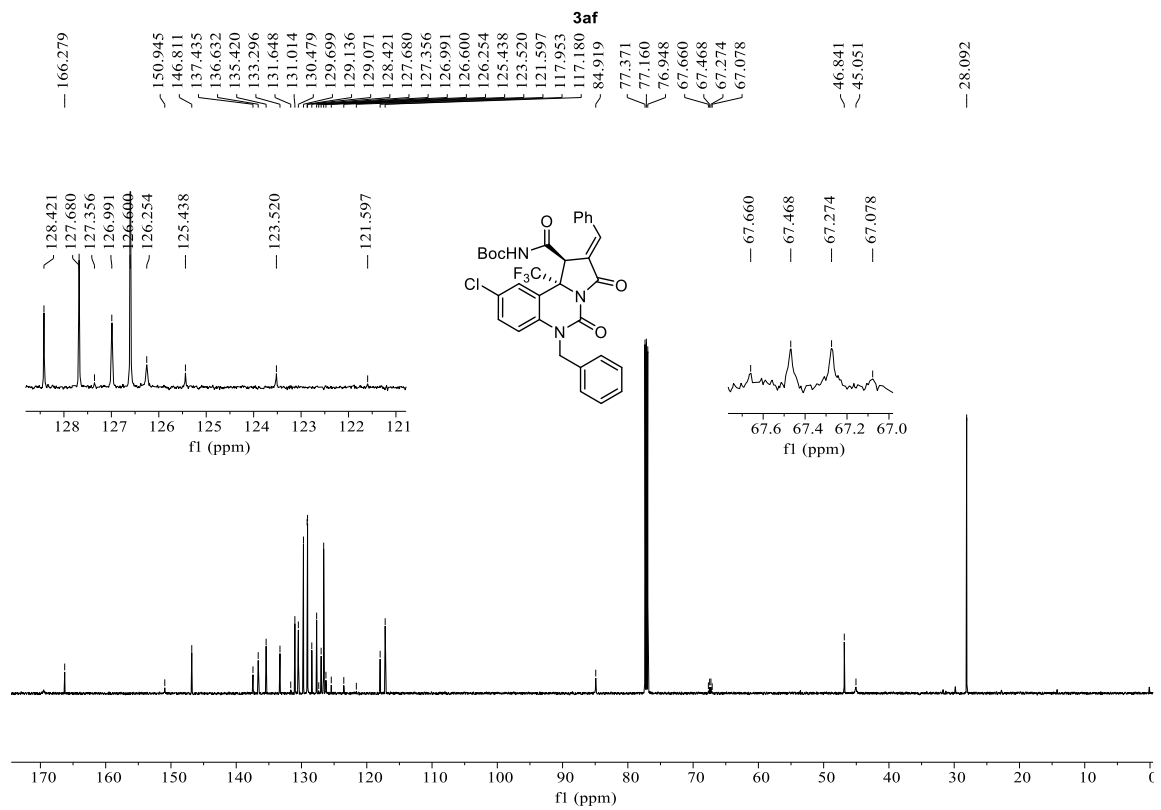

### HPLC of 3af

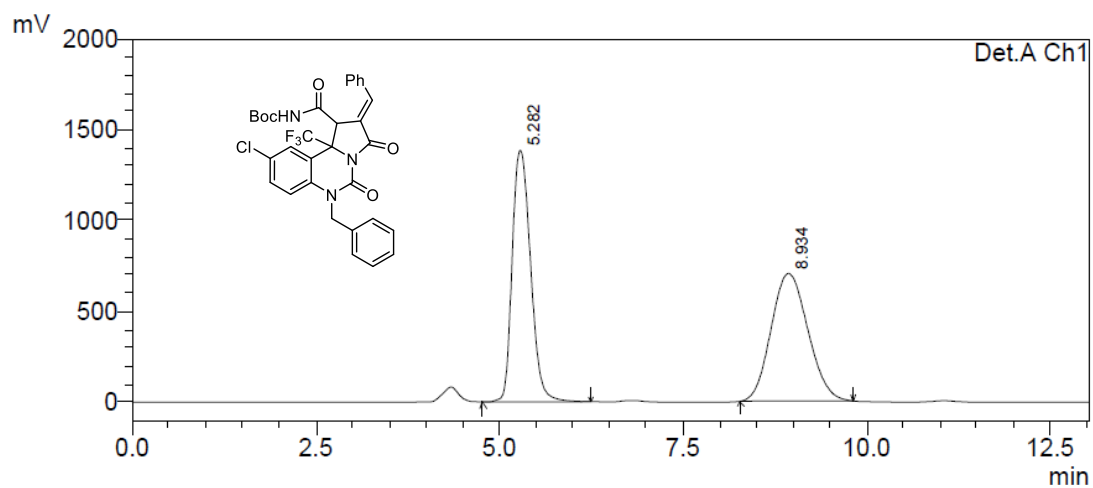

PeakTable

Detector A Ch1 254nm

| Peak# | Ret. Time | Area     | Height  | Area %  |
|-------|-----------|----------|---------|---------|
| 1     | 5.282     | 24049995 | 1383999 | 49.505  |
| 2     | 8.934     | 24531219 | 702742  | 50.495  |
| Total |           | 48581214 |         | 100.000 |

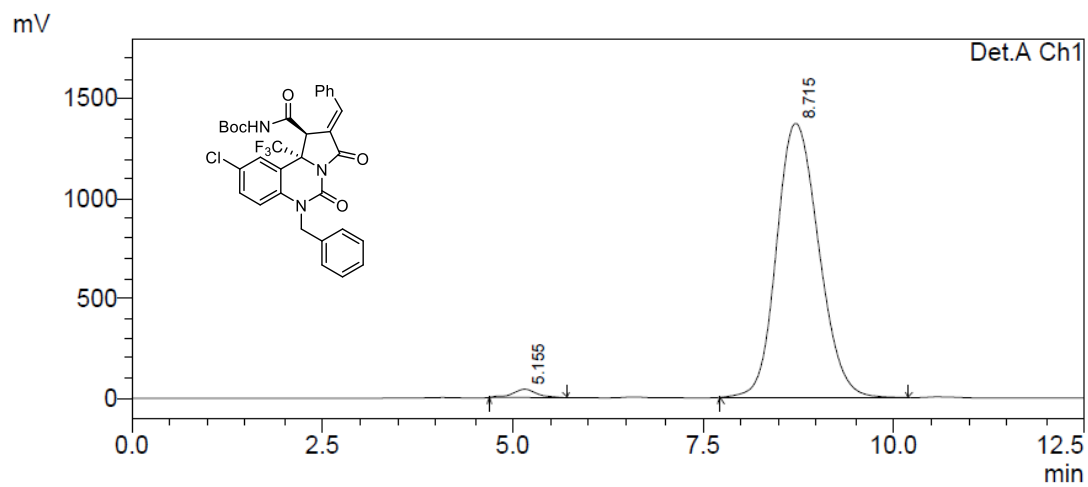

PeakTable

Detector A Ch1 254nm

| Peak# | Ret. Time | Area     | Height  | Area %  |
|-------|-----------|----------|---------|---------|
| 1     | 5.155     | 905870   | 41163   | 1.687   |
| 2     | 8.715     | 52777825 | 1370695 | 98.313  |
| Total |           | 53683695 |         | 100.000 |

$^1\text{H}$  and  $^{13}\text{C}$  NMR of **3ag**

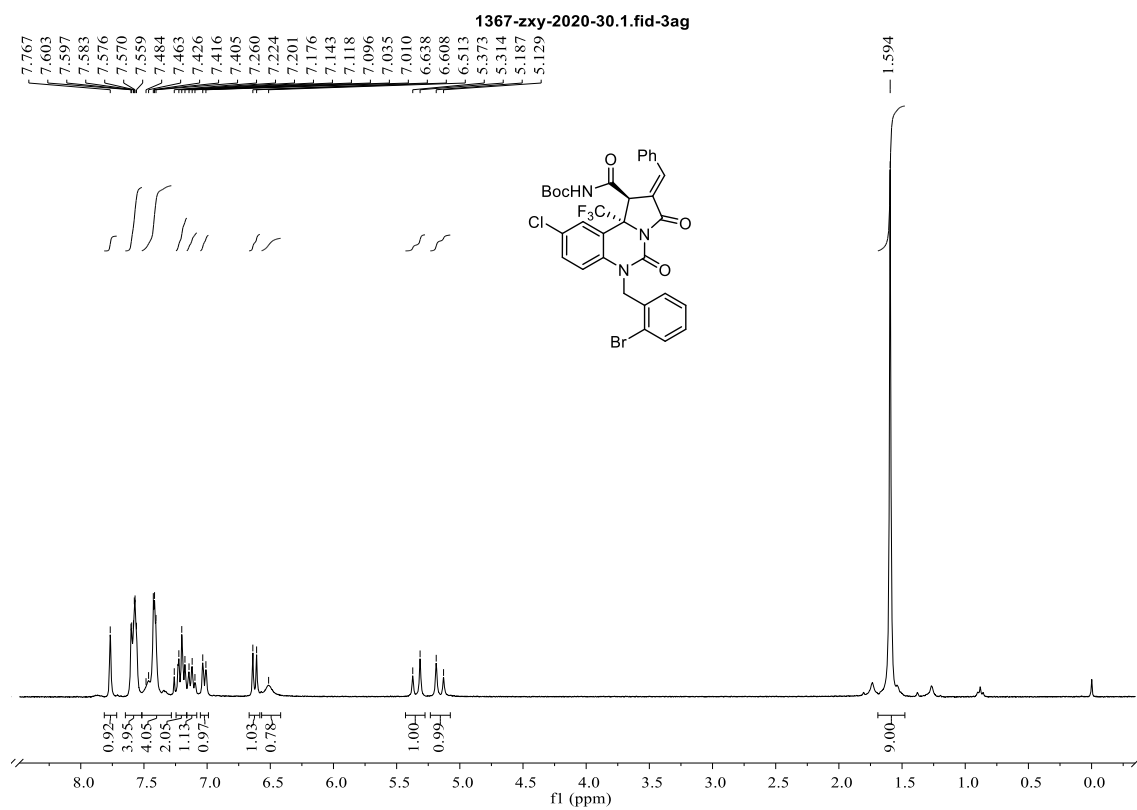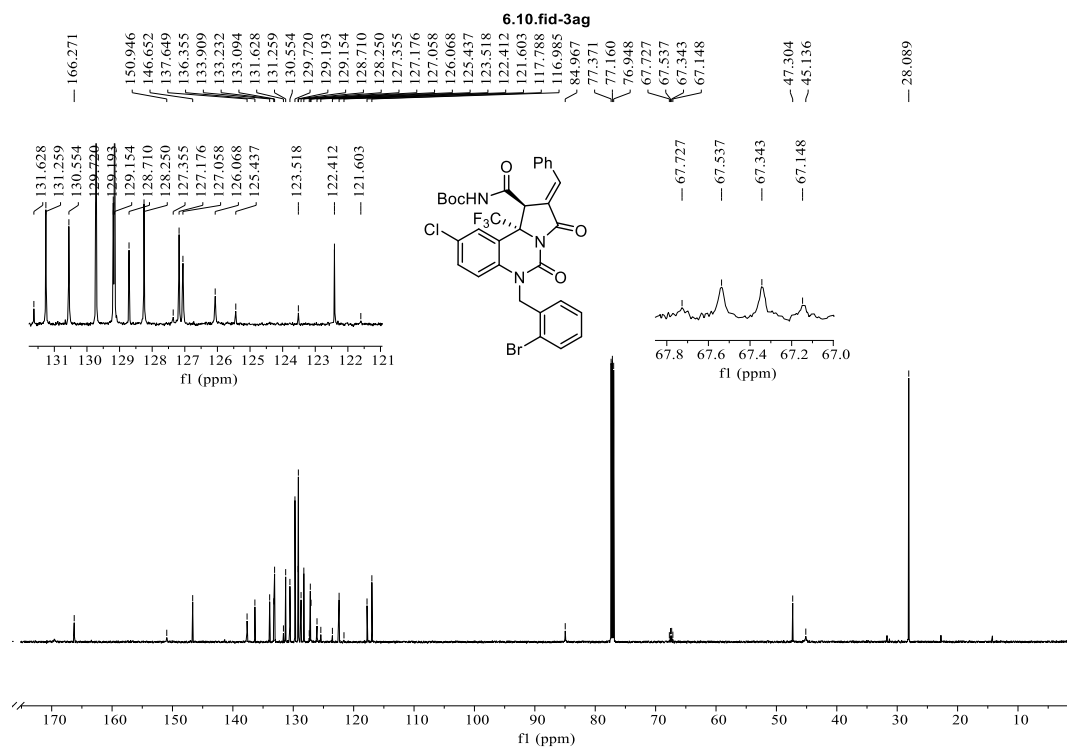

### HPLC of 3ag

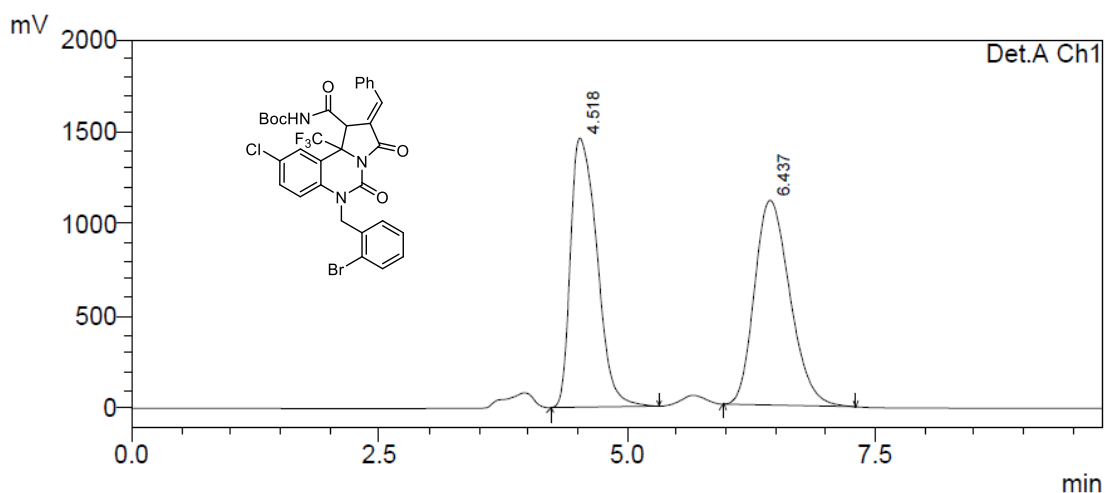

PeakTable

Detector A Ch1 254nm

| Peak# | Ret. Time | Area     | Height  | Area %  |
|-------|-----------|----------|---------|---------|
| 1     | 4.518     | 27130999 | 1459424 | 49.510  |
| 2     | 6.437     | 27667862 | 1110785 | 50.490  |
| Total |           | 54798861 |         | 100.000 |

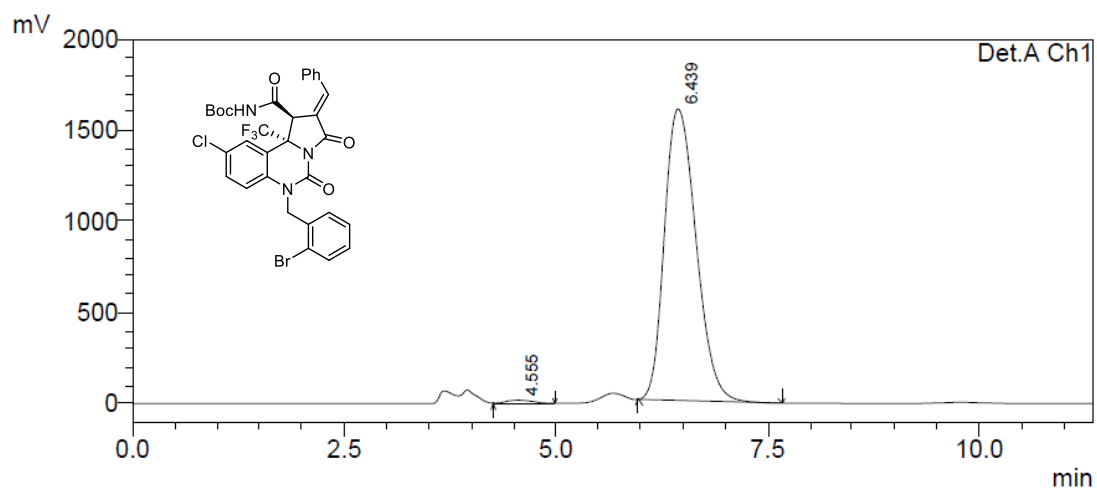

PeakTable

Detector A Ch1 254nm

| Peak# | Ret. Time | Area     | Height  | Area %  |
|-------|-----------|----------|---------|---------|
| 1     | 4.555     | 417899   | 18302   | 0.993   |
| 2     | 6.439     | 41674007 | 1599024 | 99.007  |
| Total |           | 42091906 |         | 100.000 |

<sup>1</sup>H and <sup>13</sup>C NMR of 4

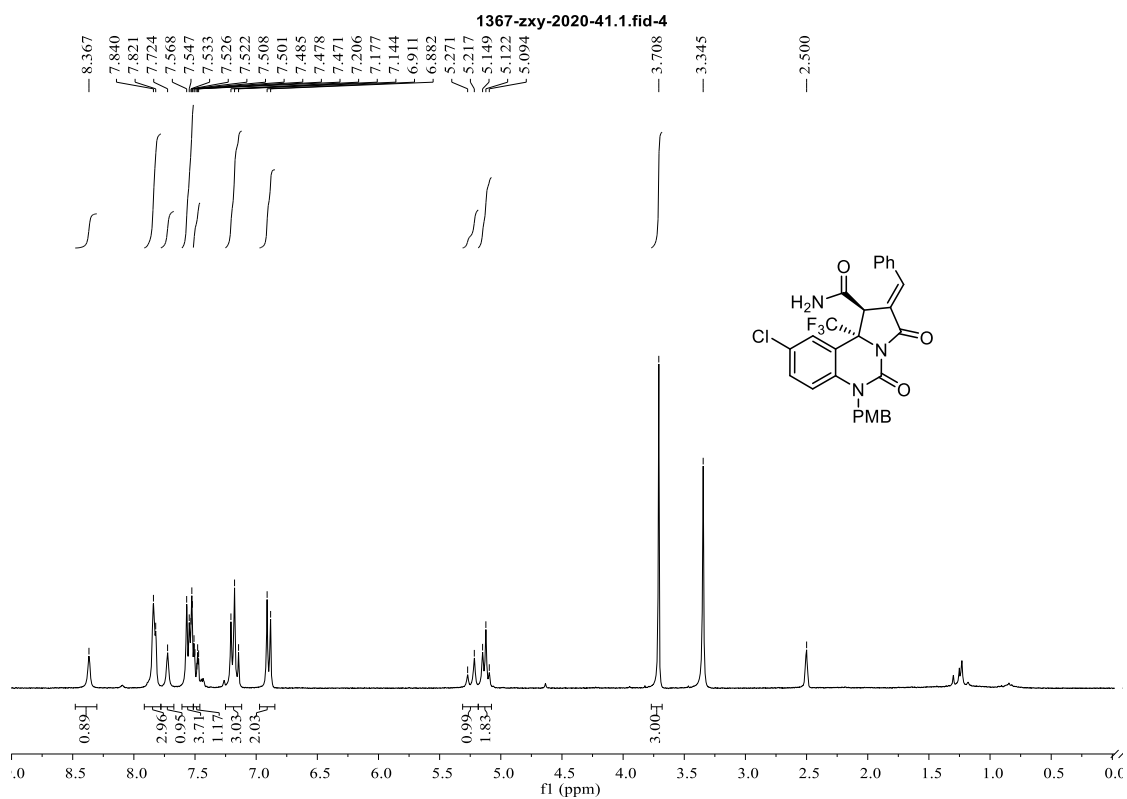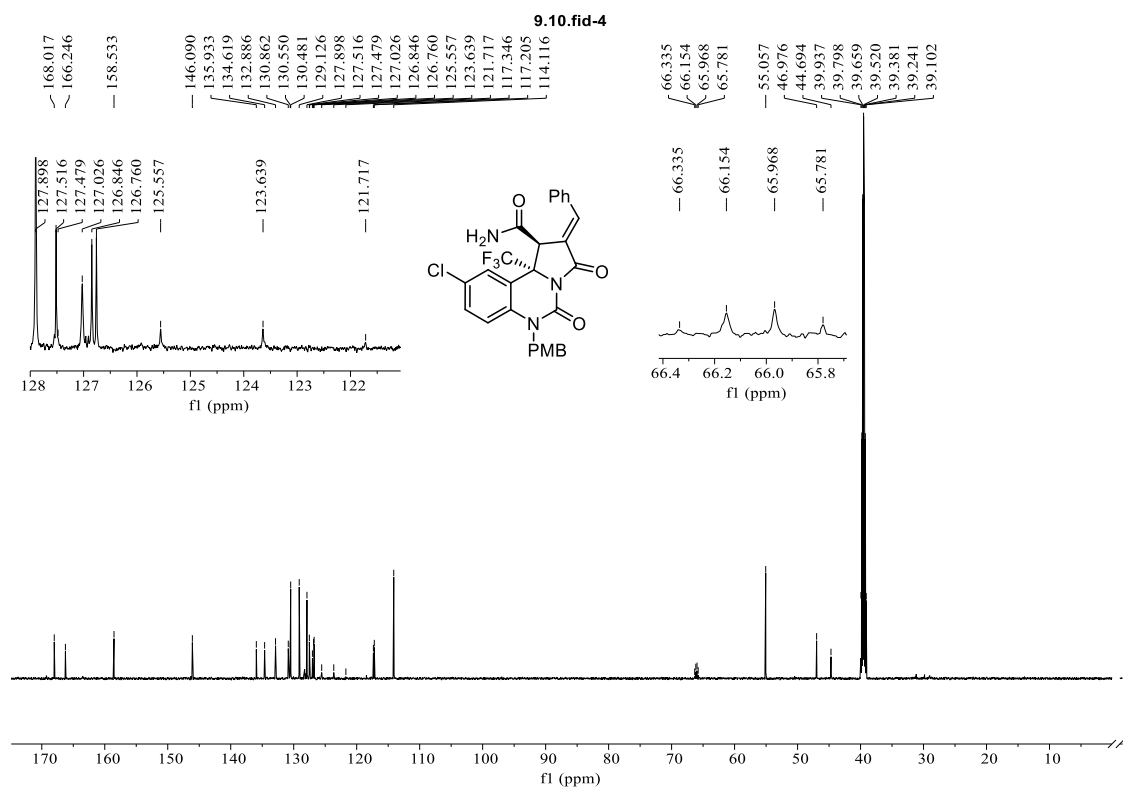

### HPLC of 4

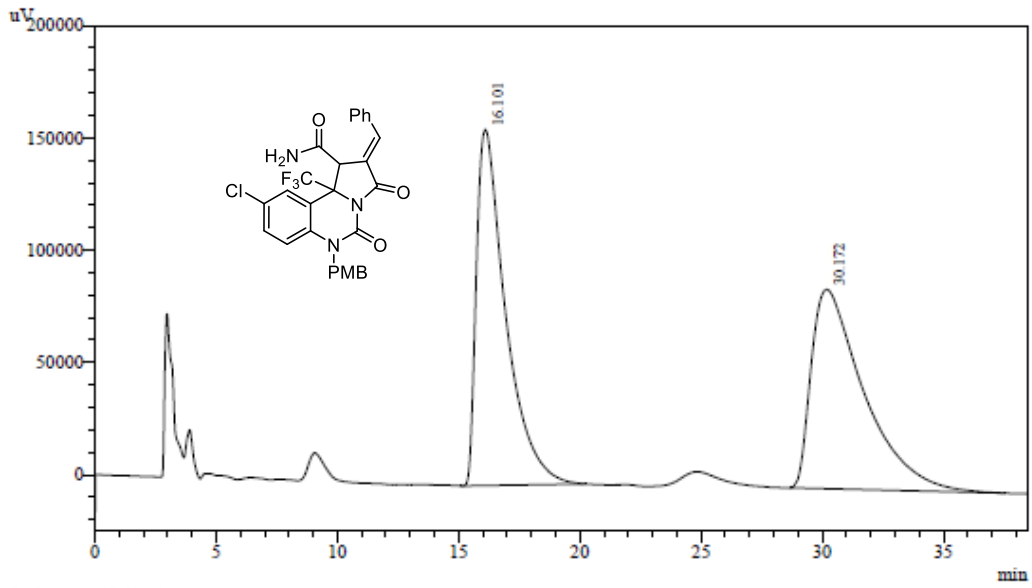

Detector A Ch1 254nm

| Peak# | Ret. Time | Area     | Height | Area %  | Height % |
|-------|-----------|----------|--------|---------|----------|
| 1     | 16.101    | 13275100 | 158512 | 49.743  | 64.116   |
| 2     | 30.172    | 13412142 | 88716  | 50.257  | 35.884   |
| Total |           | 26687242 | 247229 | 100.000 | 100.000  |

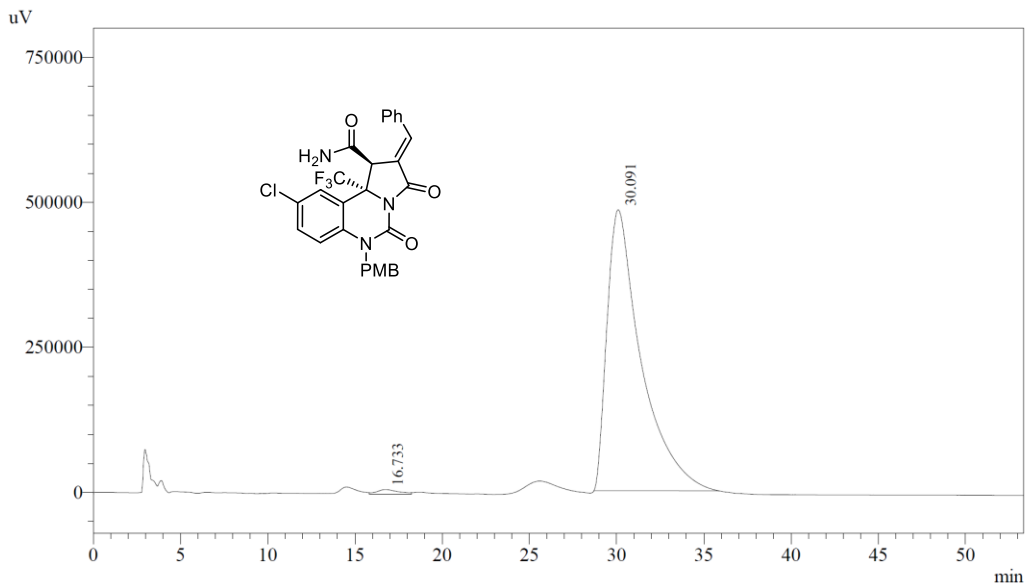

Detector A Ch1 254nm

| Peak# | Ret. Time | Area     | Height | Area %  | Height % |
|-------|-----------|----------|--------|---------|----------|
| 1     | 16.733    | 633433   | 7591   | 0.952   | 1.544    |
| 2     | 30.091    | 65870916 | 483917 | 99.048  | 98.456   |
| Total |           | 66504349 | 491508 | 100.000 | 100.000  |



<sup>1</sup>H and <sup>13</sup>C NMR of 5

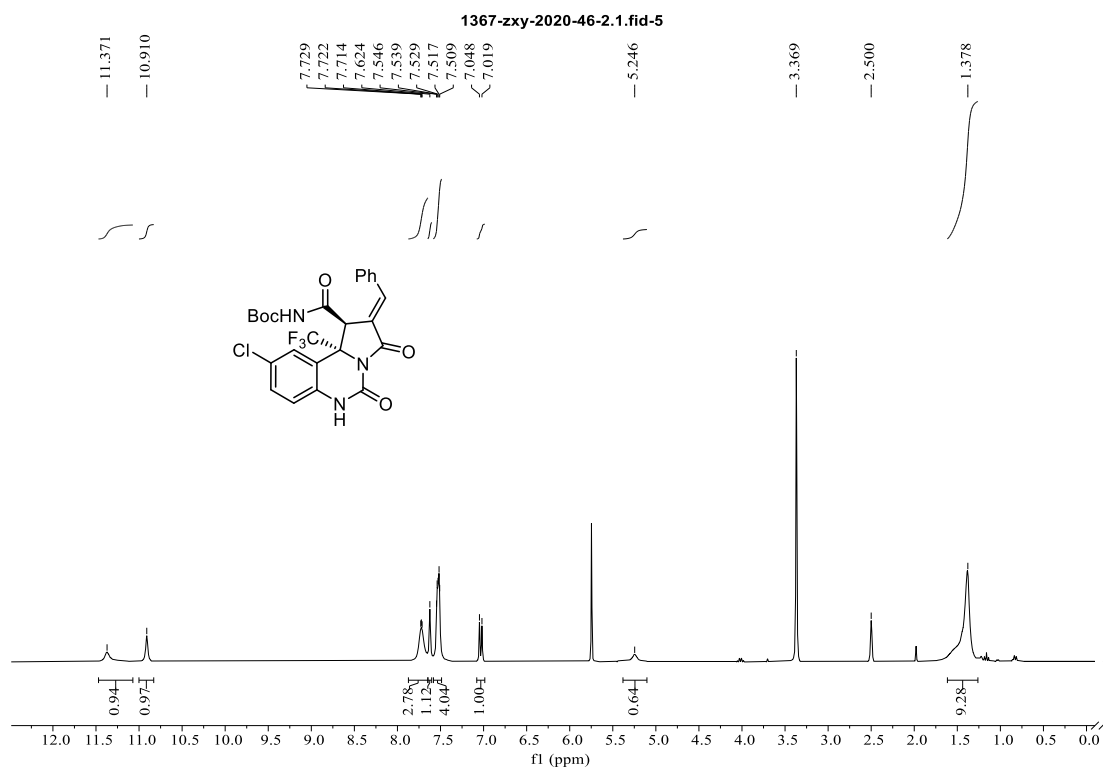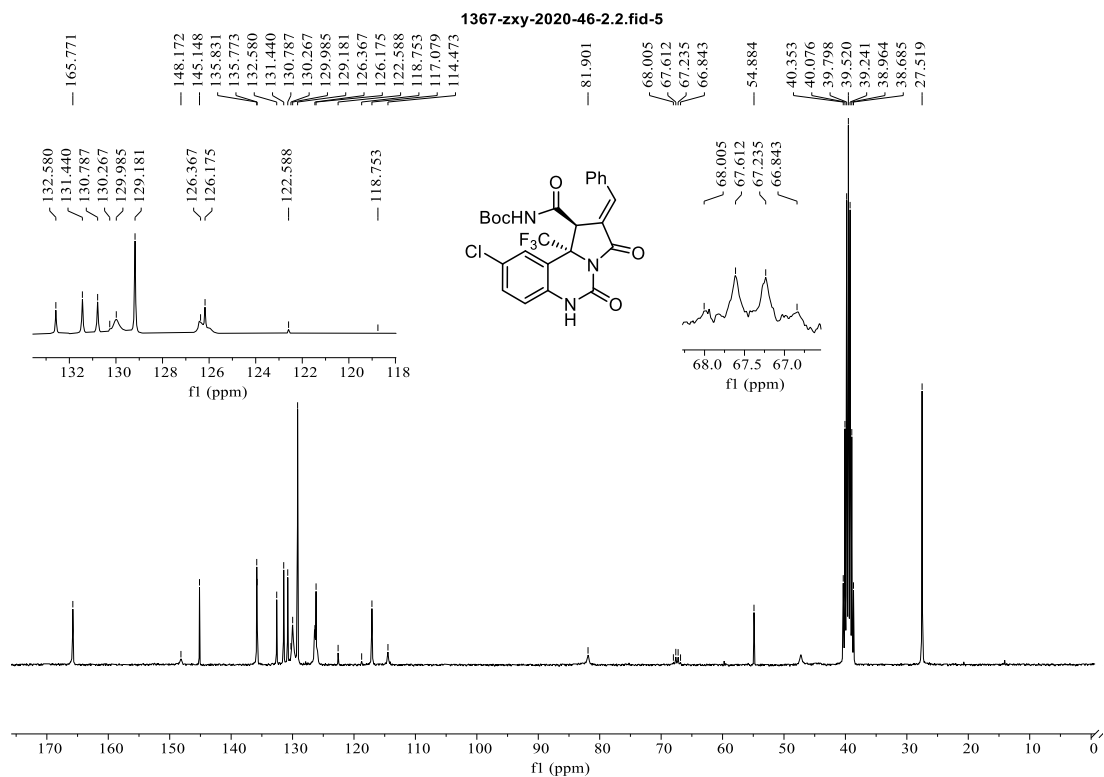

### HPLC of 5

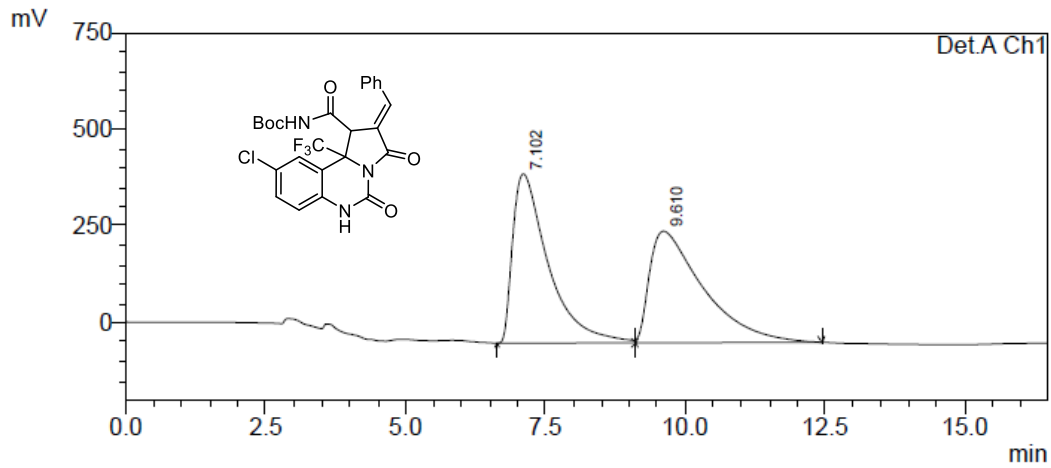

PeakTable

| Detector A Ch1 254nm |           |          |        |         |
|----------------------|-----------|----------|--------|---------|
| Peak#                | Ret. Time | Area     | Height | Area %  |
| 1                    | 7.102     | 19388878 | 437330 | 50.194  |
| 2                    | 9.610     | 19239139 | 288258 | 49.806  |
| Total                |           | 38628017 |        | 100.000 |

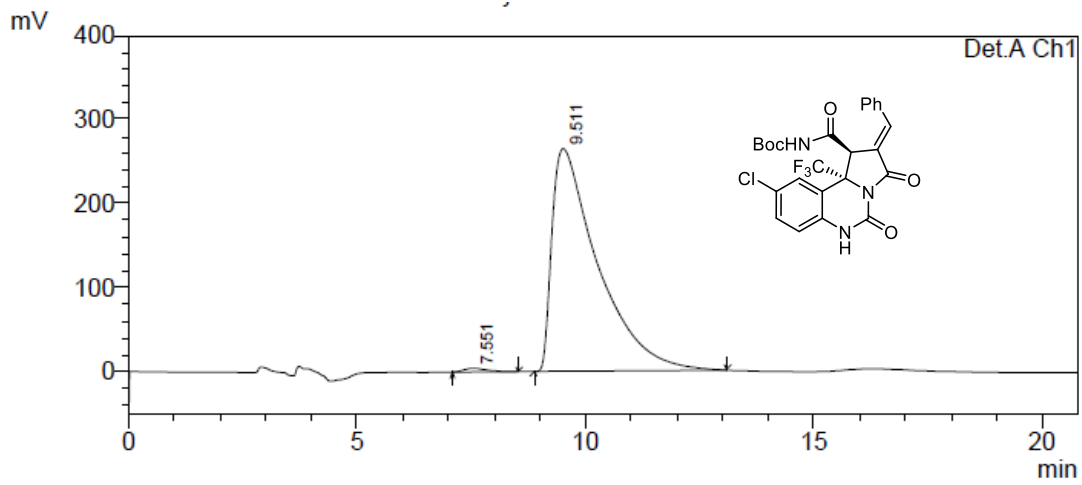

PeakTable

| Detector A Ch1 254nm |           |          |        |         |
|----------------------|-----------|----------|--------|---------|
| Peak#                | Ret. Time | Area     | Height | Area %  |
| 1                    | 7.551     | 151711   | 4393   | 0.813   |
| 2                    | 9.511     | 18509567 | 264710 | 99.187  |
| Total                |           | 18661278 |        | 100.000 |

<sup>1</sup>H and <sup>13</sup>C NMR of 6

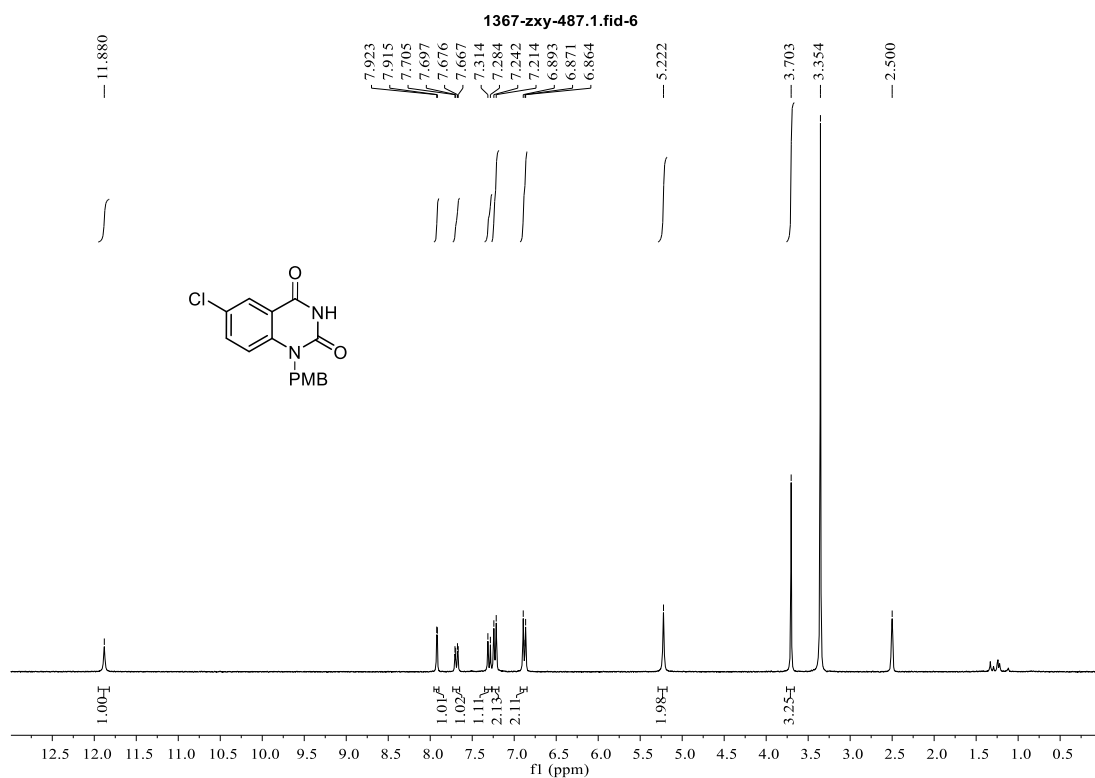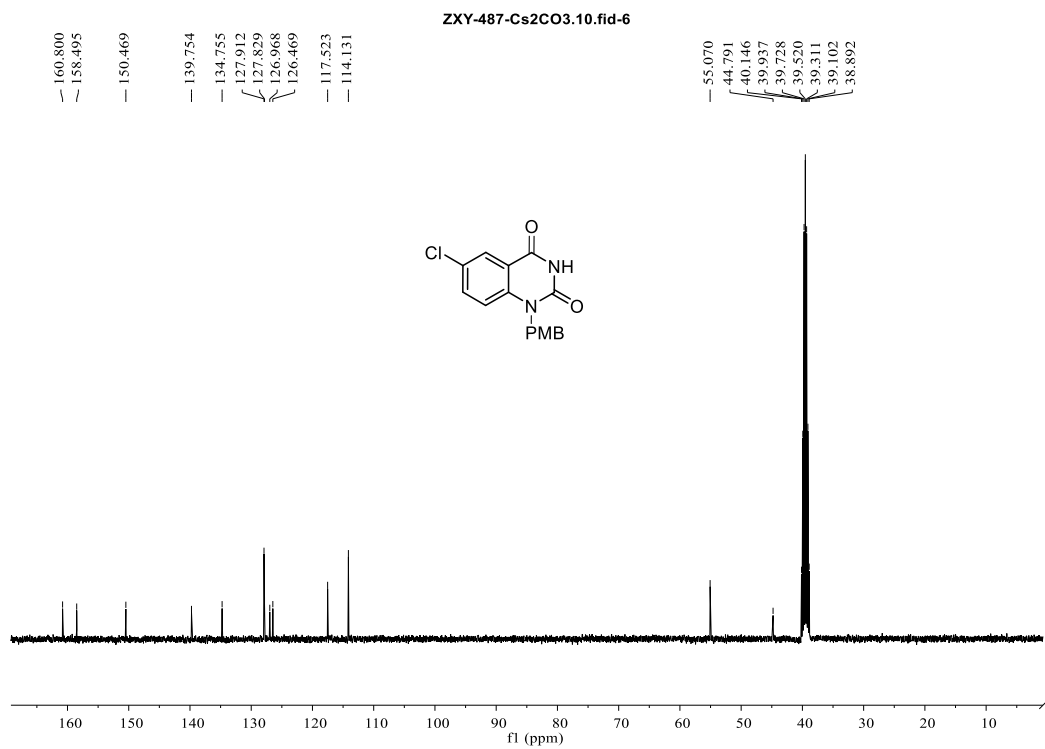

Supplement: d0cc08131k1.pdf [file d0cc08131k1.pdf]
